# Supplementary material for: Dual role of benzophenone enables a fast and scalable C-4 selective alkylation of pyridines in flow
Source: Chem Sci. 2022 Oct 10;13(42):12527–32. doi: 10.1039/d2sc04990b (PMC9629060; doi:10.1039/d2sc04990b)
Supplement: SC-013-D2SC04990B-s001 [file SC-013-D2SC04990B-s001.pdf]

## ***SUPPORTING INFORMATION***

### **Dual Role of Benzophenone Enables a Fast and Scalable C-4 Selective Alkylation of Pyridines in Flow**

Jesús Sanjosé-Orduna<sup>†</sup>, Rodrigo C. Silva<sup>†</sup>, Fabian Raymenants, Bente Reus, Jannik Thaens, Kleber T. de Oliveira and Timothy Noël\*

# Table of Contents

|      |                                                                                           |    |
|------|-------------------------------------------------------------------------------------------|----|
| 1.   | GENERAL INFORMATION.....                                                                  | 3  |
| 2.   | SETUP OF THE REACTION IN FLOW.....                                                        | 4  |
| 3.   | REACTION OPTIMIZATION.....                                                                | 6  |
| 3.1. | Photocatalyst and oxidant screening.....                                                  | 7  |
| 3.2. | Equivalents of Benzophenone.....                                                          | 8  |
| 3.3. | Benzophenones screening .....                                                             | 9  |
| 3.4. | Solvent screening.....                                                                    | 10 |
| 3.5. | Residence time optimization.....                                                          | 11 |
| 3.6. | Concentration optimization .....                                                          | 12 |
| 3.7. | H-Donor and photocatalyst equivalent correlation .....                                    | 13 |
| 3.8. | Optimization of the residence time for the deprotection step in the telescoped setup..... | 14 |
| 4    | SCOPE LIMITATIONS.....                                                                    | 15 |
| 5    | SYNTHETIC PROCEDURES .....                                                                | 15 |
| 5.1  | Synthesis of pyridinium carboxylate salt: .....                                           | 15 |
| 5.2  | Synthesis of substituted pyridinium salts (1a-1d): .....                                  | 15 |
| 5.3  | General procedure A: Photoflow and Fed-batch deprotection.....                            | 16 |
| 5.4  | General Procedure B: Telescope setup: .....                                               | 16 |
| 6    | EXPERIMENTAL DATA.....                                                                    | 18 |
| 7    | EXPERIMENTAL MECHANISTIC STUDIES .....                                                    | 27 |
| 7.2  | ON-OFF experiment.....                                                                    | 28 |
| 7.3  | Kinetic Orders.....                                                                       | 28 |
| 7.4  | Kinetic Isotope Effect .....                                                              | 31 |
| 7.5  | H/D scrambling .....                                                                      | 32 |
| 7.6  | Oxygen Effect in Flow .....                                                               | 33 |
| 7.7  | Oxygen Effect in Batch.....                                                               | 35 |
| 8    | COMPUTATIONAL MECHANISTIC STUDIES .....                                                   | 36 |
| 8.1  | Overall Free Energy Profiles.....                                                         | 37 |
| 8.2  | Cartesian Coordinates and Absolute Energies .....                                         | 38 |
| 9    | NMR DATA.....                                                                             | 58 |
| 10   | REFERENCES.....                                                                           | 82 |

## 1. GENERAL INFORMATION

Reagents and solvents were bought from Sigma Aldrich, TCI and fluorochem and were used as received. Technical solvents were bought from VWR International and were used as received. All capillary tubing and microfluidic fittings were purchased from IDEX Health & Science. Syringe pumps were purchased from Chemix Inc. model Fusion 200 Touch. The crude products were purified by flash column chromatography on silica gel (P60, SILICYCLE). TLC analysis was performed using silica on aluminum foils TLC plates (F254, Supleco Sigma Aldrich) with visualization under ultraviolet light (254 nm). Organic solutions were concentrated under reduced pressure on a Büchi rotary evaporator (in vacuo at 40 °C, ~20 mbar). The regioisomeric and diastereomeric ratios were determined by <sup>1</sup>H NMR analysis of the crude reaction mixture through the integration of diagnostic signals. <sup>1</sup>H (400 MHz), <sup>13</sup>C (100 MHz) spectra were recorded on ambient temperature using a Bruker-Avance 400. <sup>1</sup>H NMR spectra were reported in parts per million (ppm) downfield relative to CDCl<sub>3</sub> (7.26 ppm) and <sup>13</sup>C NMR spectra were reported in ppm relative to CDCl<sub>3</sub> (77.00 ppm). NMR spectra used the following abbreviations to describe the multiplicity: s (singlet), d (doublet), t (triplet), q (quartet), p (pentet), h (hextet), hept (heptet), m (multiplet), dd (double doublet), td (triple doublet). Coupling constants (J) were reported in hertz (Hz). NMR data were processed using the MestReNova 14 software package. Known products were characterized by comparing to the corresponding <sup>1</sup>H NMR and <sup>13</sup>C NMR from the literature. High-resolution mass spectra (HRMS) were recorded by using an AccuTOF GC v 4g, JMS-T100GCV Mass spectrometer (JEOL, Japan). The names of all products were generated using the PerkinElmer ChemBioDraw Ultra v. 18.0.0 software package.

## 2. SETUP OF THE REACTION IN FLOW

For the optimization experiments and the evaluation of the scope, a Vapourtec device with a UV-150 photochemical reactor was used, equipped with 60 W, 365 nm LED. The active reactor volume was 3.33 mL using a coil of PFA (ID: 0.8 mm).

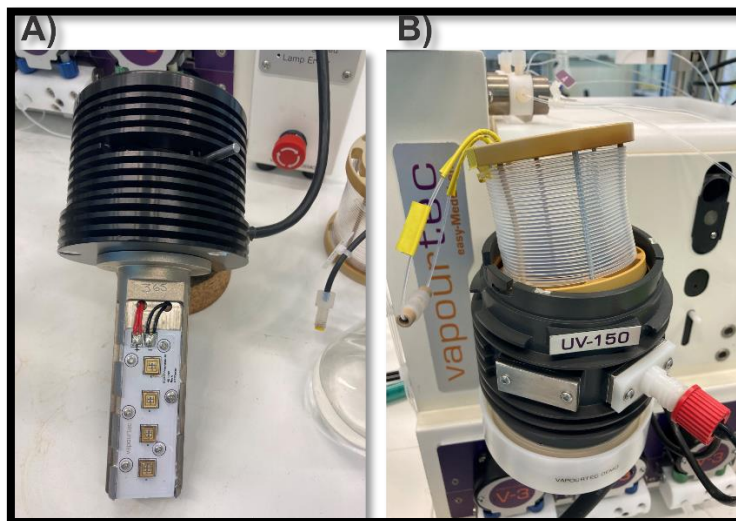

Figure S1: Photoreactor assembling. **A)** Light source using 365 nm at 60 W, and **B)** installation of PFA coil holder in the Vapourtec System.

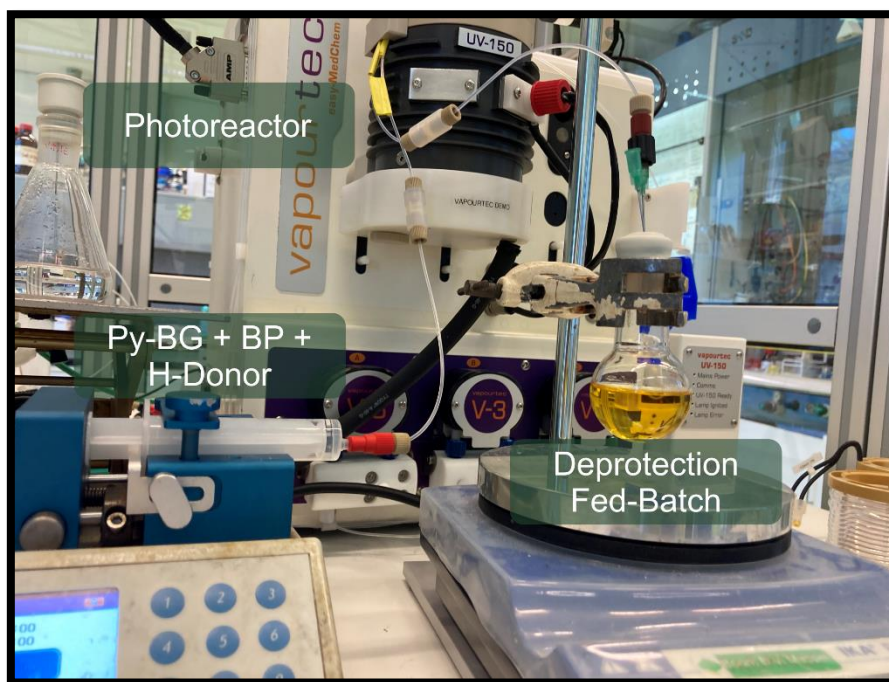

Figure S2: Overview of the reaction setup using the fed-batch approach.

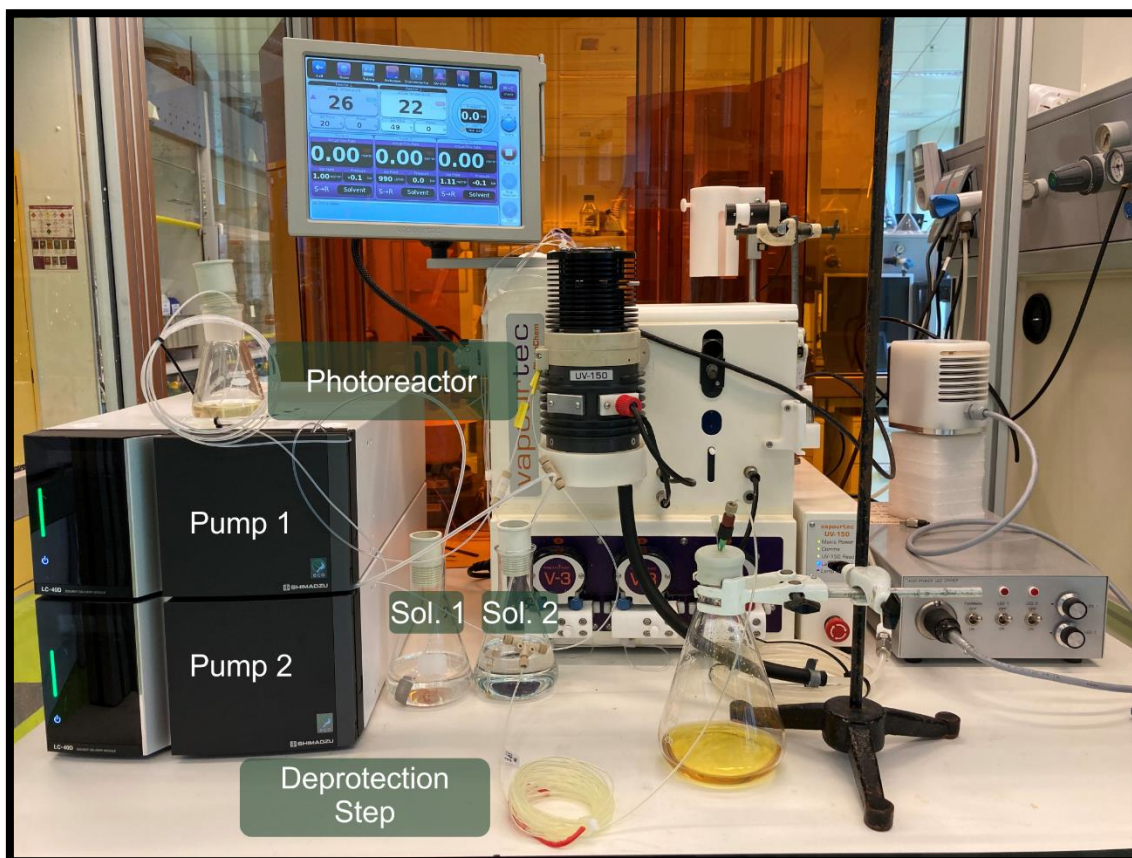

Figure S3: Overview of the reaction setup using the telescope approach. Sol. 1: pyridine blocking group, H-Donor, and benzophenone in acetonitrile. Sol. 2: DBU in dichloromethane.

### 3. REACTION OPTIMIZATION

For the development of the herein described C-4 selective Minisci reaction, a screening of several reaction conditions that promotes the alkyl-aryl bond formation efficiently were tested. An initial solution, containing a pyridine bearing a fumarate-based blocking group (**1a**), cyclohexane (**2a**) as model alkane, a photocatalyst and an oxidant, was introduced into a syringe and pumped through the photoreactor displayed in Figure S1. The resulting reaction crude was collected in a vial after a given residence time, and the solvent was evaporated. The yield of the targeted product (**3a**) was calculated by  $^1\text{H}$  NMR spectroscopy, using 1,3,5-trimethoxybenzene as an internal standard. The  $^1\text{H}$  NMR signals used for yield determination were the aromatic protons from the pyridine ring for both starting material and product (Figure S4).

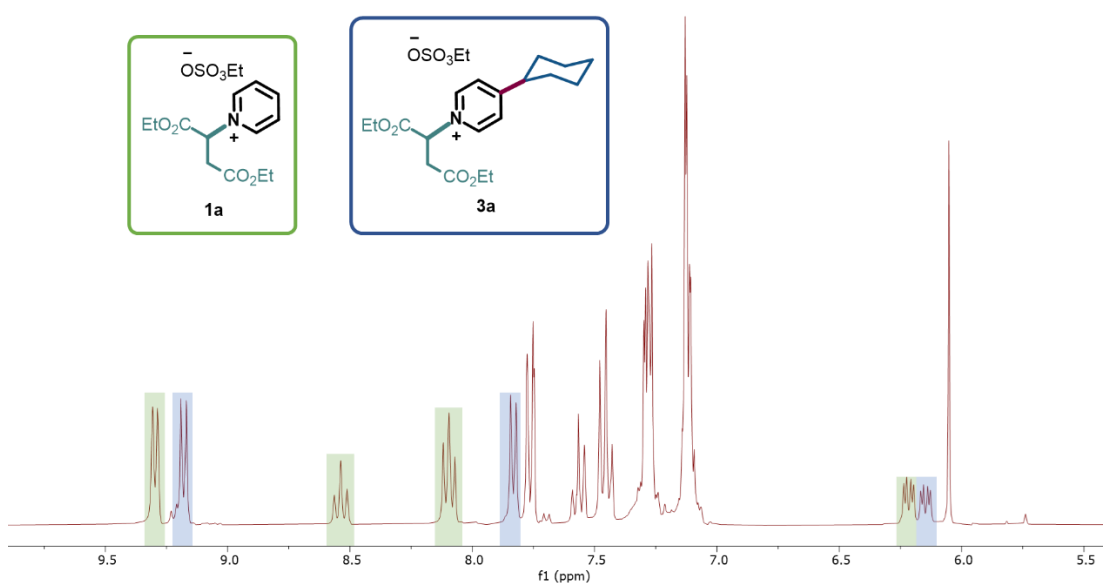

Figure S4:  $^1\text{H}$  NMR spectrum of a reaction crude highlighting both starting material (in green) and product (in blue) characteristic peaks.

### 3.1. Photocatalyst and oxidant screening

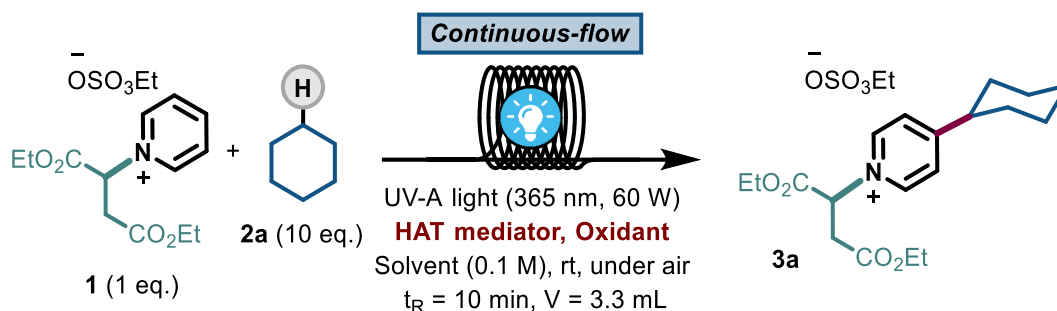

| Entry | Oxidant (2 eq.)                                               | HAT mediator     | Solvent                                                    | Yield <sup>a</sup> (%) |
|-------|---------------------------------------------------------------|------------------|------------------------------------------------------------|------------------------|
| 1     | (NH <sub>4</sub> ) <sub>2</sub> S <sub>2</sub> O <sub>8</sub> | TBADT (0.04 eq.) | CH <sub>3</sub> CN:H <sub>2</sub> O (1:1)                  | 24                     |
| 2     | (NH <sub>4</sub> ) <sub>2</sub> S <sub>2</sub> O <sub>8</sub> | BP1 (0.2 eq.)    | CH <sub>3</sub> CN:H <sub>2</sub> O (1:1)                  | 28                     |
| 3     | Ph(I)OAc <sub>2</sub>                                         | BP1 (0.2 eq.)    | CH <sub>3</sub> CN                                         | 38                     |
| 4     | DMP                                                           | BP1 (0.2 eq.)    | CH <sub>3</sub> CN:CH <sub>2</sub> Cl <sub>2</sub> (2.6:1) | 27                     |
| 5     | Selectfluor                                                   | BP1 (0.2 eq.)    | CH <sub>3</sub> CN:H <sub>2</sub> O (1:1)                  | 42                     |
| 6     |                                                               | BP1 (0.2 eq.)    | CH <sub>3</sub> CN                                         | 13                     |
| 7     |                                                               |                  | CH <sub>3</sub> CN                                         | 0 <sup>b</sup>         |

<sup>a</sup> Yield determined by quantitative <sup>1</sup>H NMR using 1,3,5-trimethoxybenzene as an internal standard. DMP = Dess-Martin Periodinane, TBADT = tetrabutylammonium decatungstate. BP1 = benzophenone

First, we tested different combinations of stoichiometric oxidants and photocatalysts. The most used oxidant in Minisci-type transformations, i.e. (NH<sub>4</sub>)<sub>2</sub>S<sub>2</sub>O<sub>8</sub> gave rise to solubility problems, as precipitation was observed during the reaction evolution, even when using water as a cosolvent. Therefore we switched to other organic oxidants, such as Ph(I)OAc<sub>2</sub>, DMP or Selectfluor. On the side of the photocatalysts, an aromatic ketone such as benzophenone (**BP1**) demonstrated to be, at least, equally efficient as TBADT, so we adopted **BP1** as the photocatalyst. More interestingly, a blank experiment without external oxidant also furnished the targeted product **3a**, albeit in low yield.

Due to this unexpected dual role of the benzophenone, both as hydrogen atom transfer mediator and terminal oxidant (entry 6), we next investigated the effect of increasing the equivalents of **BP1**.

## 3.2. Equivalents of Benzophenone

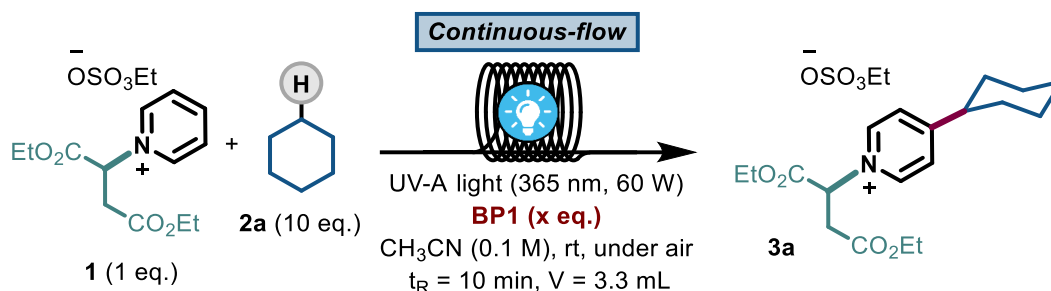

| Entry | BP1 (eq.) | Yield <sup>a</sup> (%) |
|-------|-----------|------------------------|
| 1     | 0.2       | 13                     |
| 2     | 1         | 63                     |
| 3     | 1.5       | 70                     |
| 4     | 2.0       | 65                     |

<sup>a</sup> Yield determined by quantitative <sup>1</sup>H NMR using 1,3,5-trimethoxybenzene as an internal standard.

After finding that sub-stoichiometric amounts of benzophenone can promote the Minisci reaction, we decided to investigate the effect of using stoichiometric amounts. Using 1 equivalent gave rise the desired coupling product **3a** in 63% qNMR yield. We could increase slightly the yield by using 1.5 equivalents of **BP1**, to 70%. However, when we used 2 equivalents, we started to observe the formation of by-products in the reaction mixture. Analysis of the different crudes by LC-MS demonstrated that overalkylation of **3a** took place when increasing the amount of **BP1** (Figure S5).

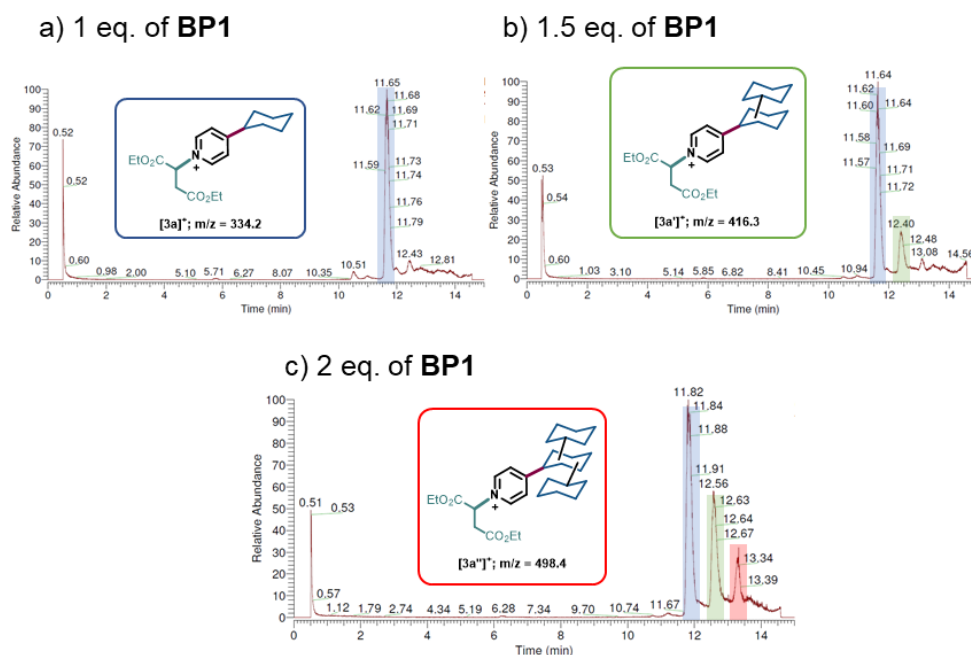

Figure S5: LC-MS measurements of the different reaction crudes.

### 3.3. Benzophenones screening

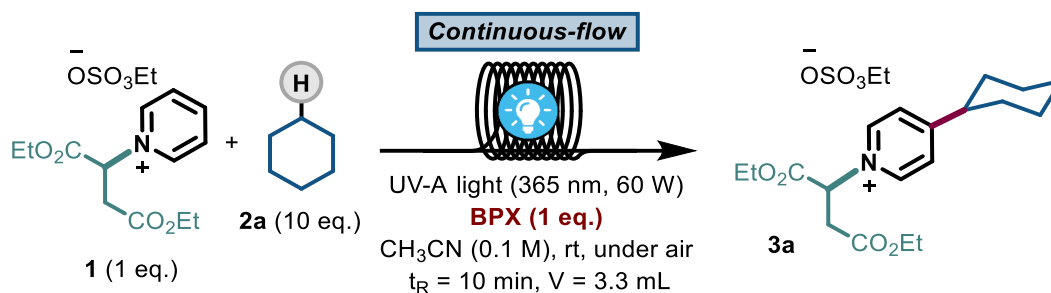

| Entry | Benzophenone (BPX) | Yield <sup>a</sup> (%) |
|-------|--------------------|------------------------|
| 1     | BP1                | 63                     |
| 2     | BP2                | 36                     |
| 3     | BP3                | 52                     |
| 4     | BP4                | 55                     |

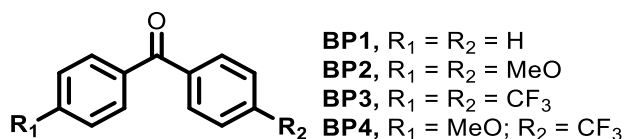

<sup>a</sup> Yield determined by quantitative <sup>1</sup>H NMR using 1,3,5-trimethoxybenzene as an internal standard.

Different substituted benzophenones were also tested. When using an electron-rich benzophenone, **BP2**, the compound **3a** was obtained in 36% yield. An electron-poor benzophenone such as **BP3**, gave rise compound **3a** in 52% yield. Finally, **BP4** bearing an electron-withdrawing group and an electron-donating group at the same time, yielded the product **3a** in 55% yield. Overall, none of the substituted benzophenones outperformed the standard and cheap **BP1**.

### 3.4. Solvent screening

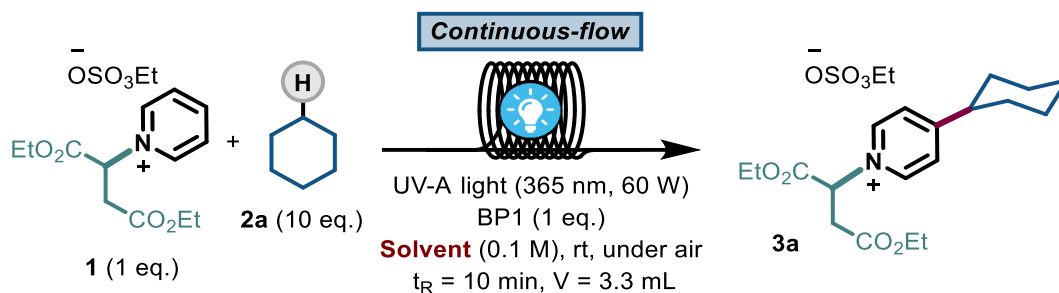

| Entry | Solvent                                   | Yield <sup>a</sup> (%) |
|-------|-------------------------------------------|------------------------|
| 1     | CH <sub>3</sub> CN                        | 63                     |
| 2     | CH <sub>3</sub> OH                        | 32                     |
| 3     | CH <sub>2</sub> Cl <sub>2</sub>           | 54                     |
| 4     | CHCl <sub>3</sub>                         | 20                     |
| 5     | DCE                                       | 60                     |
| 6     | Acetone                                   | 57                     |
| 7     | CH <sub>3</sub> CN:H <sub>2</sub> O (2:1) | 44                     |

<sup>a</sup> Yield determined by quantitative <sup>1</sup>H NMR using 1,3,5-trimethoxybenzene as an internal standard. DCE = dichloroethane.

The solvent screening of the reaction revealed that acetonitrile, dichloromethane, dichloroethane and acetone were promoting the formation of **3a** more efficiently, giving rise 63%, 54%, 60% and 57% yield, respectively. A significantly lower yield was achieved when using chloroform as the solvent of the reaction. More interestingly, the reaction demonstrated to be water-tolerant, observing a 44% formation of **3a** when using a biphasic mixture of acetonitrile/water (2:1).

### 3.5. Residence time optimization

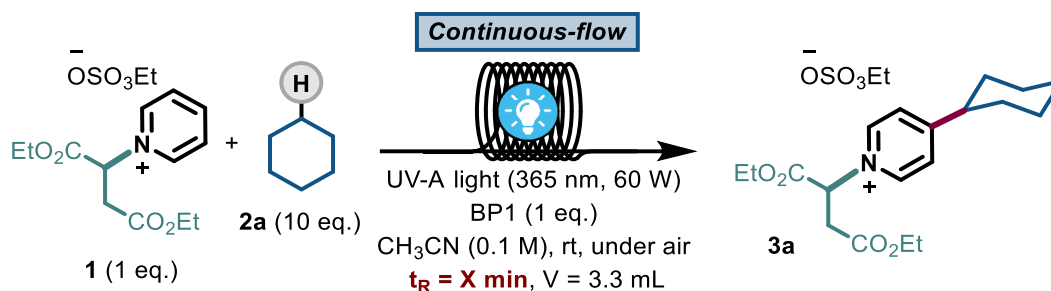

| Entry | Residence time (min) | Yield <sup>a</sup> (%) |
|-------|----------------------|------------------------|
| 1     | 30                   | 61                     |
| 2     | 10                   | 63                     |
| 3     | 5                    | 62                     |
| 4     | 3                    | 58                     |
| 5     | 1                    | 42                     |

<sup>a</sup> Yield determined by quantitative <sup>1</sup>H NMR using 1,3,5-trimethoxybenzene as an internal standard.

Next, the residence time of the reaction inside the photochemical reactor was investigated. At 10 minutes of residence time, full conversion was observed with good yield. Longer residence time did not promote the degradation of the product and with shorter residence time than 5 minutes, lower conversion was observed.

### 3.6. Concentration optimization

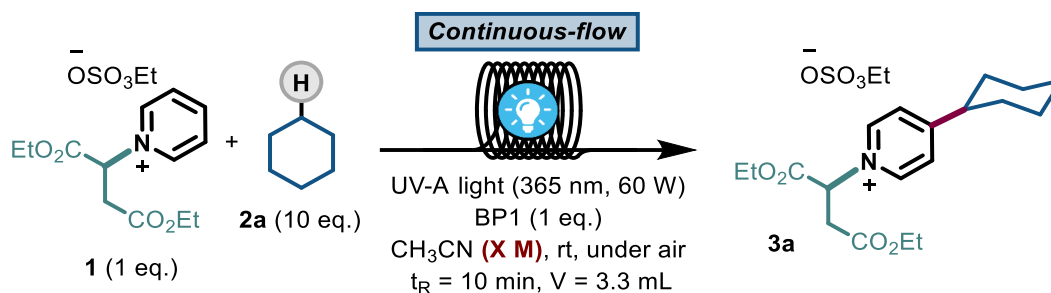

| Entry | [1] (mol.L <sup>-1</sup> ) | Yield <sup>a</sup> (%) |
|-------|----------------------------|------------------------|
| 1     | 0.1                        | 63                     |
| 2     | 0.05                       | 62                     |
| 3     | 0.03                       | 61                     |
| 4     | 0.01                       | 61                     |

<sup>a</sup> Yield determined by quantitative <sup>1</sup>H NMR using 1,3,5-trimethoxybenzene as an internal standard.

We then investigated the effect of changing the concentration of **1** used in the reaction. Using higher concentration than 0.1 mol.L<sup>-1</sup> gave rise immiscible mixtures, incompatible with our microfluidic setup. When more diluted solutions were tested, similar reaction yield was obtained.

### 3.7. H-Donor and photocatalyst equivalent correlation

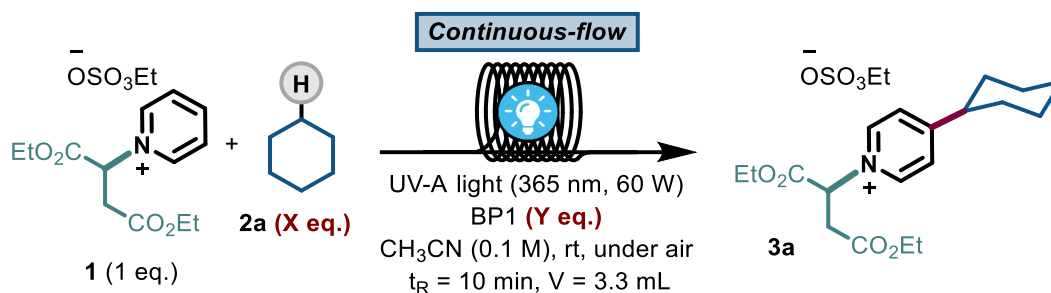

| Entry | Cyclohexane (x eq.) | BP1 (x eq.) | Yield <sup>a</sup> (%) |
|-------|---------------------|-------------|------------------------|
| 1     | 15                  | 1           | 64                     |
| 2     | 10                  | 1           | 63                     |
| 3     | 5                   | 1           | 65                     |
| 4     | 2.5                 | 1           | 55                     |
| 5     | 1.5                 | 1           | 41                     |
| 6     | 2.5                 | 1.5         | 66                     |
| 7     | 1.5                 | 1.5         | 50                     |

<sup>a</sup> Yield determined by quantitative <sup>1</sup>H NMR using 1,3,5-trimethoxybenzene as an internal standard.

Furthermore, the required amount of alkane was investigated, and also the ratio of alkane/**BP1**. Using concentrations higher than 15 equivalents of **2a** afforded an immiscible solution. In addition, a slight decrease in yield was observed when 2.5 equivalents of **BP1** were used. However, when an excess of **BP1** (1.5 equivalents) and a low concentration of **2a** (2.5 equivalents) were used, the compound **3a** was obtained in 66% yield.

### 3.8. Optimization of the residence time for the deprotection step in the telescoped setup

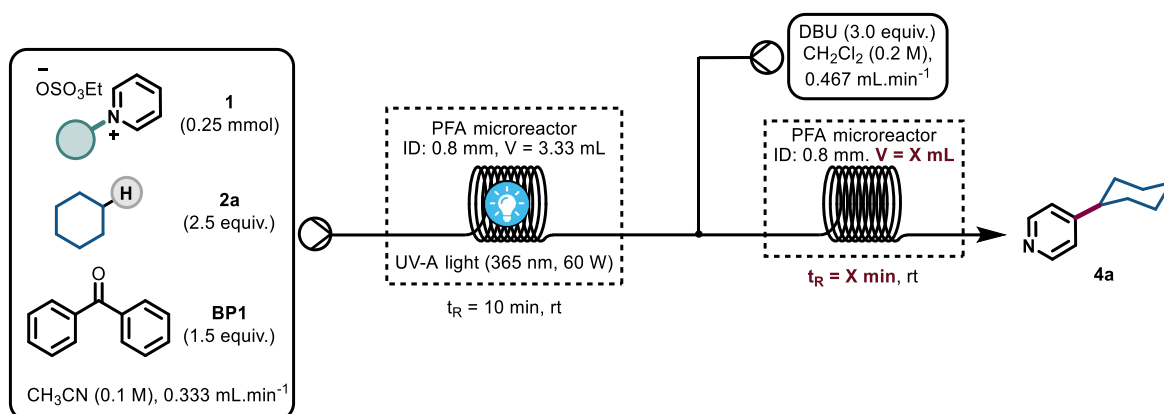

| Entry | Coil Volume (mL) | Residence time (min) | Yield <sup>a</sup> (%) |
|-------|------------------|----------------------|------------------------|
| 1     | 0.8              | 1                    | 54                     |
| 2     | 4                | 5                    | 62                     |
| 3     | 8                | 10                   | 64                     |

<sup>a</sup> Yield determined by quantitative <sup>1</sup>H NMR using 1,3,5-trimethoxybenzene as an internal standard.

A mixture of pyridinium salt **1** (94.4 mg, 0.25 mmol), **BP1** (68.3 mg, 0.375 mmol, 1.5 eq.), **2a** (67  $\mu$ L, 0.625 mmol, 2.5 eq.) in CH<sub>3</sub>CN (0.1 M) was pumped through a PFA coil (ID: 0.8 mm, V = 3.33 mL, PFA = perfluoroalkoxy polymer) at a rate of 0.333 mL/min inside the photoreactor (Vapourtec, 365 nm, 60 W) at room temperature. The outflow of the latter was then mixed in a PEEK T-mixer with a solution of DBU (112  $\mu$ L, 3 eq.) in CH<sub>2</sub>Cl<sub>2</sub> (4.2 mL) pumped at 0.467 mL/min. For residence time screening of the deprotection step (second step) was used PFA coil (ID: 0.8 mm) volume between 0.8 and 8 mL. The resulting mixture was quenched in a vial with trifluoroacetic acid (5 eq.) in CH<sub>3</sub>CN (3 mL).

## 4 SCOPE LIMITATIONS

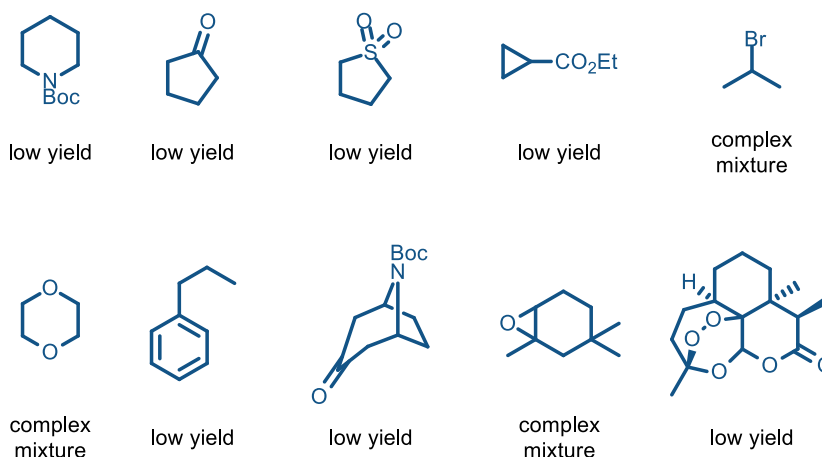

Herein we describe a list of some alkanes that were tested but unsuccessful under the developed reaction conditions. Either very low yields or complex mixtures were obtained, so further optimization of the methodology will be required in order to introduce a pyridine ring in these moieties.

## 5 SYNTHETIC PROCEDURES

### 5.1 Synthesis of pyridinium carboxylate salt:

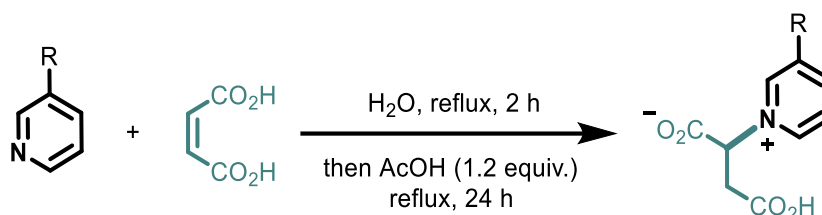

The synthesis of pyridinium carboxylate salt was performed following the procedure described in the literature.<sup>1</sup> To a solution of maleic acid (11.61 g, 100 mmol) in  $\text{H}_2\text{O}$  (50 mL) was added the corresponding pyridine (8.05 mL, 100 mmol, 1 eq.). The solution was stirred at 90 °C for 2 h. After this time a crystalline solid precipitate in solution and acetic acid (6.9 mL, 120 mmol, 1.2 eq.) was added. The suspension was kept under stirring at 90 °C for 24 h. The crude reaction was cooled down to room temperature, filtered and the precipitate was washed with water,  $\text{CH}_3\text{OH}$  and EtOAc. The resulting white solid was dried overnight under reduced pressure and used for the next step without further purification.

### 5.2 Synthesis of substituted pyridinium salts (1a-1d):

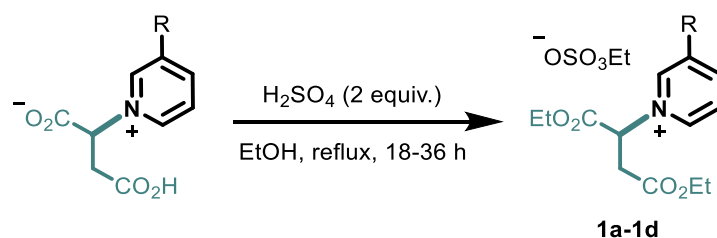

The synthesis of substituted pyridinium salts (1a-1d) were performed following the procedure described in the literature.<sup>1</sup> To a solution of pyridinium carboxylate

salt (1 eq.) in EtOH (0.2 M) was added concentrated sulfuric acid (2 eq.). The solution was stirred at 90 °C for 18-36 h. The solvent was evaporated under reduced pressure and the crude reaction was diluted with a mixture of dichloromethane and H<sub>2</sub>O (0.5 M, 9:1). The mixture was extracted 10 times with dichloromethane and the combined organic phase was dried by MgSO<sub>4</sub>, filtered and the solvent evaporated under reduced pressure. The resulting product was dried overnight under reduced pressure and used for the next step without further purification. All NMR data of the compounds were in according to described in the literature.

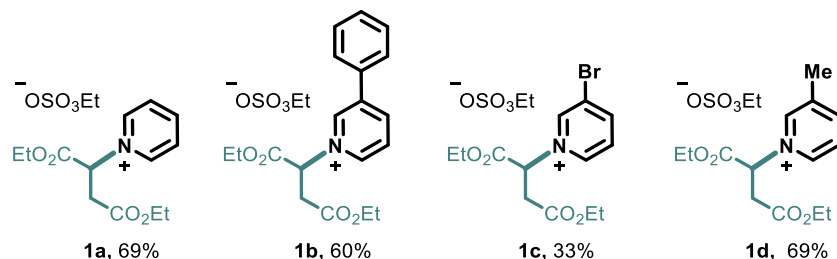

### 5.3 General procedure A: Photoflow and Fed-batch deprotection

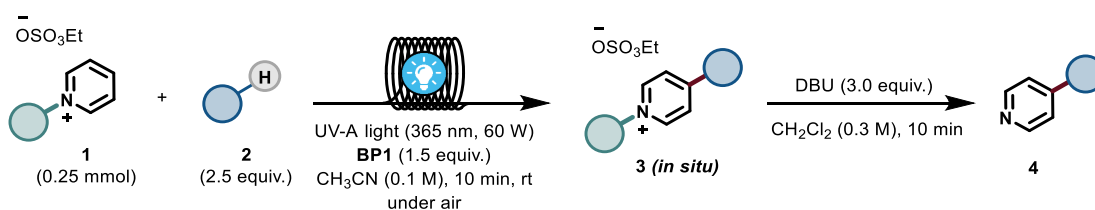

A mixture of pyridinium salt (**1**) (188.7 mg, 0.5 mmol), **BP1** (136.7 mg, 0.75 mmol, 1.5 eq.), H-donor (**2**) (2.5 eq.) in CH<sub>3</sub>CN (0.1 M) was pumped through the coil (ID: 0.8 mm, V = 3.33 mL) to a rate of 0.333 mL/min by the photoreactor (Vapourtec, 365 nm, 60 W) to room temperature. The mixture was collected in a vial containing DBU (224 μL, 3 eq.) in CH<sub>2</sub>Cl<sub>2</sub> (2.5 mL). Then, the solvent was evaporated and the product was isolated by a chromatography column.

### 5.4 General Procedure B: Telescope setup:

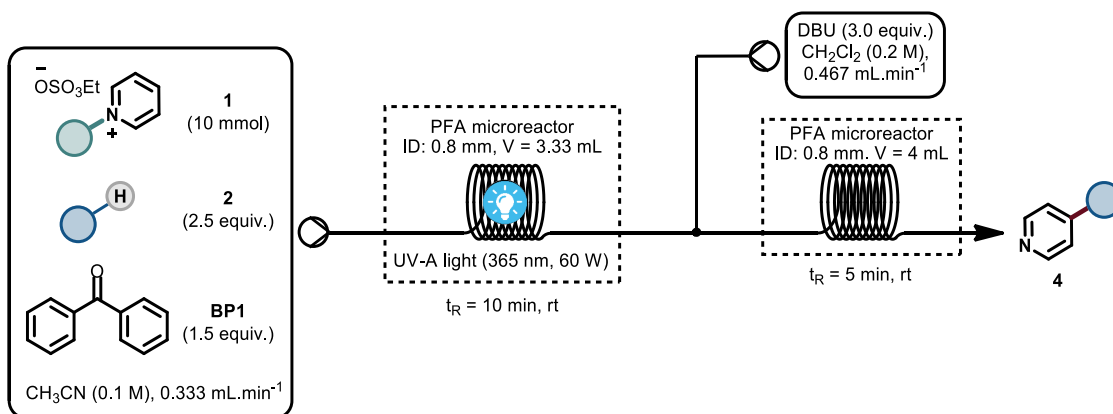

A mixture of pyridinium salt (**1**) (3.77 g, 10 mmol), **BP1** (2.73 g, 15 mmol, 1.5 eq.), H-donor (**2**) (2.5 eq.) in CH<sub>3</sub>CN (0.1 M) was pumped through the PFA coil (ID: 0.8

mm,  $V = 3.33$  mL) to a rate of 0.333 mL/min by the photoreactor (Vapourtec, 365 nm, 60 W) to room temperature. The outflow of the latter was then mixed in a PEEK T-mixer with a solution of DBU (4.5 mL, 3 eq.) in  $\text{CH}_2\text{Cl}_2$  (168 mL) pumped at 0.467 mL/min by a PFA coil (ID: 0.8 mm,  $V = 4.00$  mL) at room temperature. The solvent was evaporated under reduced pressure and the crude mixture was diluted in cyclohexane (100 mL) and aq. 1 M HCl (75 mL). The mixture was extracted in a separatory funnel and the aqueous phase was washed with cyclohexane (3 times x 50 mL). Then, the pH of the aqueous solution was adjusted above 10 with aq. 1 M NaOH and the mixture extracted with EtOAc (3 times x 50 mL). The combine organic was dried with anhydrous  $\text{MgSO}_4$ , filtered and the solvent evaporated under reduced pressure.

## 6 EXPERIMENTAL DATA

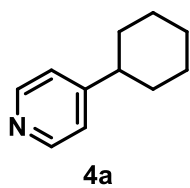

4-cyclohexylpyridine (**4a**): Compound **4a** (reported compound)<sup>1</sup> was obtained following the general procedure A using cyclohexane (135  $\mu$ L, 1.25 mmol, 2.5 eq.) as substrate. The compound **4a** was isolated by silica gel chromatography (DCM:MeOH = 99.5:0.5) and obtained as a yellow oil (50.1 mg, 61% yield).

5 mmol scale: The compound **4a** was obtained following the general procedure A using cyclohexane (1.35 mL, 2.5 equiv.) as substrate. The compound **4a** was isolated by silica gel chromatography (516.1 mg; 64% yield).

Gram scale: The compound **4a** was obtained following the general procedure B using cyclohexane (2.7 mL, 2.5 equiv.) as substrate. The compound **4a** was isolated by acid-base extraction (1.20 g, 74% yield, 91% purity).

<sup>1</sup>H NMR (400 MHz, CDCl<sub>3</sub>):  $\delta$  8.48 (bs, 2H); 7.11 (d,  $J$  = 5.2 Hz, 2H); 2.54 – 2.43 (m, 1H); 1.91 – 1.81 (m, 4H); 1.76 (d,  $J$  = 12.6 Hz, 1H); 1.39 (pent,  $J$  = 12.6 Hz, 4H); 1.31 – 1.21 (m, 1H).

<sup>13</sup>C{H} NMR (100 MHz, CDCl<sub>3</sub>):  $\delta$  156.6; 149.6; 122.4; 43.8; 33.5; 26.5; 25.9.

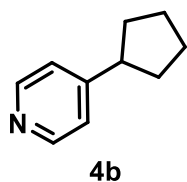

4-cyclopentylpyridine (**4b**): Compound **4b** (reported compound)<sup>2</sup> was obtained following the general procedure A using cyclopentane (117  $\mu$ L, 1.25 mmol, 2.5 equiv.) as substrate. The compound **4b** was isolated by silica gel chromatography (toluene:ethyl acetate = 95:5) and obtained as a yellow oil (43.0 mg, 58% yield).

<sup>1</sup>H NMR (400 MHz, CDCl<sub>3</sub>):  $\delta$  8.42 (bs, 2H); 7.09 (d,  $J$  = 5.6 Hz, 2H); 2.91 (quin,  $J$  = 8.40 Hz, 1H); 2.08 – 1.97 (m, 2H); 1.81 – 1.70 (m, 2H); 1.70 – 1.59 (m, 2H); 1.58 – 1.46 (m, 2H).

<sup>13</sup>C{H} NMR (100 MHz, CDCl<sub>3</sub>):  $\delta$  155.8; 149.4; 122.7; 45.2; 33.9; 25.5.

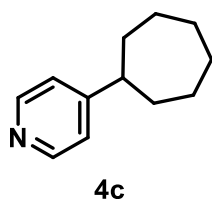

4-cycloheptylpyridine (**4c**): Compound **4c** (reported compound)<sup>3</sup> was obtained following the general procedure A using cycloheptane (152  $\mu$ L, 1.25 mmol, 2.5 equiv.) as substrate. The compound **4c** was isolated by silica gel chromatography (toluene:ethyl acetate = 95:5) and obtained as a yellow oil (58.7 mg, 67% yield).

$^1\text{H}$  NMR (400 MHz,  $\text{CDCl}_3$ ):  $\delta$  8.40 (d,  $J$  = 5.3 Hz, 2H); 7.03 (d,  $J$  = 6.0 Hz, 2H); 2.63 – 2.53 (m, 1H); 1.86 – 1.78 (m, 2H); 1.78 – 1.69 (m, 2H); 1.68 – 1.43 (m, 8H).

$^{13}\text{C}\{^1\text{H}\}$  NMR (100 MHz,  $\text{CDCl}_3$ ):  $\delta$  158.5; 149.7; 122.3; 46.2; 35.9, 27.8, 27.1.

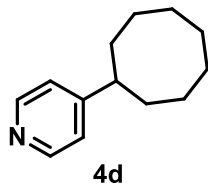

**4d**

4-cyclooctylpyridine (**4d**): Compound **4d** (reported compound)<sup>4</sup> was obtained following the general procedure A using cyclooctane (169  $\mu\text{L}$ , 1.25 mmol, 2.5 equiv.) as substrate. The compound **4d** was isolated by silica gel chromatography (toluene:ethyl acetate = 95:5) and obtained as a yellow oil (66.9 mg, 71% yield).

$^1\text{H}$  NMR (400 MHz,  $\text{CDCl}_3$ ):  $\delta$  8.39 (d,  $J$  = 5.8 Hz, 2H); 7.03 (d,  $J$  = 5.9 Hz, 2H); 2.73 – 2.61 (m, 1H); 1.82 – 1.43 (m, 14H).

$^{13}\text{C}\{^1\text{H}\}$  NMR (100 MHz,  $\text{CDCl}_3$ ):  $\delta$  158.8; 149.7; 122.5; 44.0; 33.7; 26.8; 26.2; 25.8.

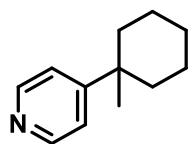

**4e-a**

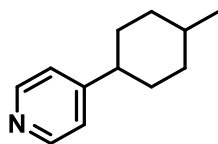

**4e-b**

4-(1-methylcyclohexyl)pyridine (**4e-a**) and 4-(4-methylcyclohexyl)pyridine (**4e-b**): The compounds **4e-a** and **4e-b** (reported compounds)<sup>1</sup> were obtained following the general procedure A using methylcyclohexane (160  $\mu\text{L}$ , 1.25 mmol, 2.5 equiv.) as substrate. The compounds **4e-a** and **4e-b** were isolated as a yellow oil (55.2 mg, 63% yield) by silica gel chromatography (DCM:MeOH = 99.5:0.5) and obtained as an inseparable mixture of regioisomers (1:1 r.r.).

$^1\text{H}$  NMR (400 MHz,  $\text{CDCl}_3$ ):  $\delta$  8.63–8.39 (m, 3.4H); 7.29–7.25 (m, 2.4H); 7.18–7.05 (m, 1.8H); 2.87–2.75 (m, 0.1H); 2.52 (dt,  $J$  = 12.0, 3.2 Hz, 0.5H); 2.48–2.37 (m, 0.2H); 2.12–1.70 (m, 7.4H); 1.66–1.51 (m, 5.3H); 1.51–1.25 (m, 7H); 1.17 (s, 3H); 1.14–0.98 (m, 1.6H); 0.95 (d,  $J$  = 6.5 Hz, 1.9H); 0.66 (d,  $J$  = 6.5 Hz, 0.7H).

$^{13}\text{C}\{^1\text{H}\}$  NMR (101 MHz,  $\text{CDCl}_3$ ):  $\delta$  159.0; 155.6; 149.8; 149.7; 124.0; 121.0; 52.0; 43.7; 42.1; 38.0; 37.3; 37.2; 37.0; 35.4; 35.2; 34.9; 34.6; 33.4; 33.0; 32.9; 32.2; 31.5; 30.0; 26.5; 26.4; 26.3; 26.1; 22.7; 22.6; 22.4; 20.6.

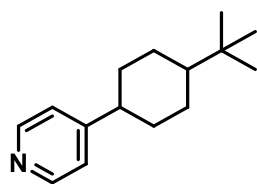

**4f-a**

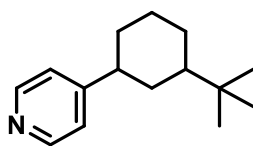

**4f-b**

4-(4-(*tert*-butyl)cyclohexyl)pyridine (**4f-a**) and 4-(3-(*tert*-butyl)cyclohexyl)pyridine (**4f-b**): The compounds **4f-a** and **4f-b** (unreported compounds) were obtained following the general procedure A using *tert*-butylcyclohexane (845  $\mu\text{L}$ , 5 mmol,

10 equiv.) as substrate. The compounds **4f-a** and **4f-b** were isolated as a yellow oil (54.1 mg, 50% yield) by silica gel chromatography (DCM:MeOH = 99.5:0.5) and obtained as an inseparable mixture of diastereomers (2.3:1 r.r., respectively).

$^1\text{H}$  NMR (400 MHz,  $\text{CDCl}_3$ ):  $\delta$  8.48 (bs, 2H); 7.15–7.07 (m, 2H); 2.47 (dt,  $J$  = 11.6, 3.3 Hz, 0.8H); 2.42 (dt,  $J$  = 12.1, 3.1 Hz, 0.2H); 1.97–1.79 (m, 4H); 1.46–1.24 (m, 3H); 1.22–0.93 (m, 3.7H); 0.87 (s, 2.5H); 0.86 (s, 6H); 0.79 (s, 0.8H); 0.77 (s, 0.5H).

$^{13}\text{C}\{\text{H}\}$  NMR (100 MHz,  $\text{CDCl}_3$ ):  $\delta$  156.6; 156.4; 154.1; 149.6; 149.6; 149.6; 149.5; 142.0; 129.3; 128.5; 128.3; 126.8; 126.5; 122.4; 48.1; 48.0; 47.5; 44.3; 43.8; 42.1; 36.6; 35.9; 34.7; 33.8; 33.2; 32.5; 32.4; 30.4; 29.8; 28.9; 27.5; 27.5; 27.4; 27.3; 27.2; 26.7; 26.6.

HRMS (ESI):  $m/z$  calcd for  $\text{C}_{15}\text{H}_{23}\text{N}_1$ : 218.1909; found: 218.1913.

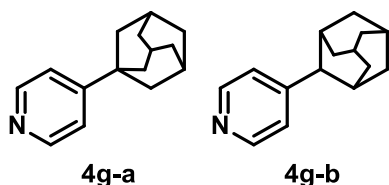

4-(adamantan-1-yl)pyridine (**4g-a**) and 4-(adamantan-2-yl)pyridine (**4g-b**): The compounds **4g-a** and **4g-b** (reported compound)<sup>1</sup> were obtained following the general procedure A using adamantane (170.3 mg, 1.25 mmol, 2.5 equiv.) as substrate. The compounds were isolated as a yellow oil (67.0 mg, 63% yield) by silica gel chromatography (DCM:MeOH = 99.5:0.5), and obtained as an inseparable mixture of regioisomers (95:5 r.r., respectively).

$^1\text{H}$  NMR (400 MHz,  $\text{CDCl}_3$ ):  $\delta$  8.51 (d,  $J$  = 6.3 Hz, 2H); 7.23 (d,  $J$  = 6.3 Hz, 2H); 2.96 (s, 0.07); 2.46 (s, 0.14); 2.11 (bs, 3H); 2.07–1.92 (m, 0.45H); 1.89 (bs, 6H); 1.78 (q,  $J$  = 12.6 Hz, 6H); 1.62–1.54 (m, 0.21H).

$^{13}\text{C}\{\text{H}\}$  NMR (100 MHz,  $\text{CDCl}_3$ ):  $\delta$  159.8, 149.7, 122.3, 120.3, 53.4, 46.4, 42.3, 38.8, 37.6, 36.5, 36.2, 31.9, 30.5, 28.7, 28.6, 27.8, 27.6.

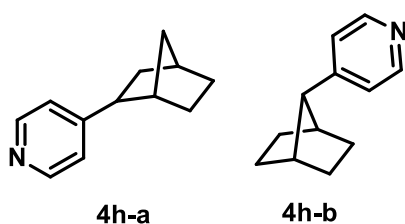

4-(bicyclo[2.2.1]heptan-2-yl)pyridine (**4h-a**) 4-(bicyclo[2.2.1]heptan-7-yl)pyridine (**4h-b**): The compounds **4h-a** and **4h-b** (reported compound)<sup>5</sup> were obtained following the general procedure A using norbornane (120.2 mg, 1.25 mmol, 2.5 equiv.) as substrate. The compounds were isolated as a yellow oil (44.3 mg, 51% yield) by silica gel chromatography (toluene:ethyl acetate = 98:2), and obtained as an inseparable mixture of regioisomers (95:5 r.r., respectively).

$^1\text{H}$  NMR (400 MHz,  $\text{CDCl}_3$ ):  $\delta$  8.46 (d,  $J$  = 5.0 Hz, 2H); 7.10 (d,  $J$  = 5.0 Hz, 2H); 3.20–3.12 (m, 0.06H); 2.74–2.64 (m, 1H); 2.41–2.32 (m, 2H); 2.00–1.90 (m, 0.14H); 1.81–1.73 (m, 1H); 1.64–1.55 (m, 3H); 1.49–1.41 (m, 1H); 1.37–1.19 (m, 3H).

$^{13}\text{C}\{\text{H}\}$  NMR (100 MHz,  $\text{CDCl}_3$ ):  $\delta$  156.2, 149.6, 149.3, 123.6, 122.5, 46.6, 45.4, 42.5, 42.2, 42.0, 40.4, 38.5, 37.3, 36.7, 36.6, 36.1, 33.6, 30.7, 30.3, 29.9, 28.7, 22.9.

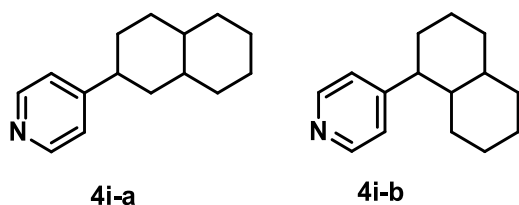

4-(decahydronaphthalen-2-yl)pyridine (**4i-a**) and 4-(decahydronaphthalen-1-yl)pyridine (**4i-b**): The compound **4i-a** and **4i-b** (unreported compound) were obtained following the general procedure A using decahydronaphthalene (193  $\mu$ L, 1.25 mmol, 2.5 equiv.) as substrate and 10 minutes of residence time. The compounds were isolated as a yellow oil (38.1 mg, 36% yield) by silica gel chromatography (pentane:ethyl acetate = 95:5 to 90:10), and obtained as an inseparable mixture of regioisomers (3:2 r.r., respectively).

$^1\text{H}$  NMR (400 MHz,  $\text{CDCl}_3$ ):  $\delta$  8.46 (bs, 4H); 7.10 (d,  $J$  = 5.4 Hz, 2H); 7.05 (d,  $J$  = 5.4 Hz, 2H); 2.55 (tt,  $J$  = 12.1, 3.4 Hz, 1H); 2.16 (td,  $J$  = 10.9, 3.7 Hz, 1H); 1.91–1.54 (m, 15H); 1.50–1.35 (m, 4H); 1.34–0.90 (m, 18H); 0.74 (dq,  $J$  = 12.7, 3.7 Hz, 1H).

$^{13}\text{C}\{^1\text{H}\}$  NMR (101 MHz,  $\text{CDCl}_3$ ):  $\delta$  156.3, 155.4, 149.6, 149.6, 123.2, 122.3, 50.58, 47.2, 43.7, 43.1, 43.0, 42.8, 40.7, 35.1, 34.2, 34.0, 33.8, 33.8, 33.6, 33.3, 31.0, 26.6, 26.5, 26.5, 26.2.

HRMS (EI):  $m/z$  calcd for  $\text{C}_{15}\text{H}_{21}\text{N}$ : 215.1674; found: 215.1667.

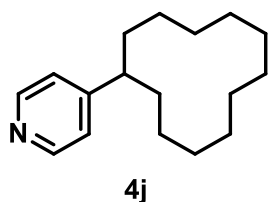

4-cyclododecylpyridine (**4j**): The compound **4j** (reported compound) was obtained following the general procedure A using cyclododecane (210.4 mg, 1.25 mmol, 2.5 equiv.) as substrate. Compound **4j** was isolated by silica gel chromatography (DCM:MeOH = 99.5:0.5), and obtained as a yellow oil (48.1 mg, 39% yield).

$^1\text{H}$  NMR (400 MHz,  $\text{CDCl}_3$ ):  $\delta$  8.46 (bs, 2H); 7.09 (d,  $J$  = 4.7 Hz, 2H); 2.73 (p,  $J$  = 6.3 Hz, 1H); 1.84–1.71 (m, 2H); 1.53–1.14 (m, 20H).

$^{13}\text{C}\{^1\text{H}\}$  NMR (101 MHz,  $\text{CDCl}_3$ ):  $\delta$  156.4; 149.5; 123.2; 39.4; 30.7; 23.8; 23.6; 23.4; 23.2; 22.4.

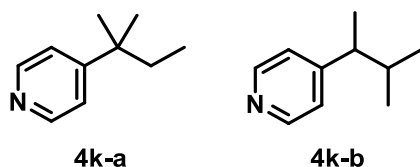

4-(tert-pentyl)pyridine (**4k-a**) and 4-(3-methylbutan-2-yl)pyridine (**4k-b**): The compounds **4k-a** and **4k-b** (reported compounds)<sup>6</sup> were obtained following the general procedure A using isopentane (582  $\mu$ L, 5 mmol, 10 equiv.) as substrate. The compounds **4k-a** and **4k-b** were isolated as a yellow oil (42.0 mg, 56% yield) by silica gel chromatography (DCM:MeOH = 99.5:0.5) and obtained as an inseparable mixture of regioisomers (9:1 r.r., respectively).

$^1\text{H}$  NMR (400 MHz,  $\text{CDCl}_3$ ):  $\delta$  8.49 (m, 2H); 7.20 (d,  $J$  = 5.9 Hz, 2H); 7.06 (d,  $J$  = 5.6 Hz, 0.2H); 2.40 (pent,  $J$  = 7.5 Hz, 0.1H); 1.76 (h,  $J$  = 6.8 Hz, 0.1H); 1.62 (q,  $J$  = 7.4 Hz, 2H); 1.25 (s, 6H); 1.20 (d,  $J$  = 7.0 Hz, 0.4H); 0.91 (d,  $J$  = 6.6 Hz, 0.4H); 0.74 (d,  $J$  = 6.7 Hz, 0.4H); 0.66 (t,  $J$  = 7.4 Hz, 3H).

$^{13}\text{C}\{\text{H}\}$  NMR (101 MHz,  $\text{CDCl}_3$ ):  $\delta$  158.5; 155.9; 149.4; 149.4; 123.2; 121.4; 46.2; 37.9; 36.1; 33.8; 27.6; 20.9; 19.8; 17.9; 8.9.

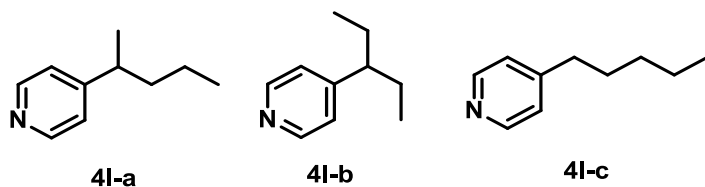

4-(pentan-2-yl)pyridine (**4I-a**), 4-(pentan-3-yl)pyridine (**4I-b**) and 4-pentylpyridine (**4I-c**): The compounds **4I-a**, **4I-b**, and **4I-c** (unreported compounds) were obtained following the general procedure A using pentane (573  $\mu\text{L}$ , 5 mmol, 10 equiv.) as substrate. The compounds were isolated as a yellow oil (33.8 mg, 45% yield) by silica gel chromatography (DCM:MeOH = 99.5:0.5) and obtained as an inseparable mixture of regioisomers (5:4:1 r.r., respectively).

$^1\text{H}$  NMR (400 MHz,  $\text{CDCl}_3$ ):  $\delta$  8.63–8.35 (m, 2.7H); 7.21 (d,  $J$  = 5.0 Hz, 0.2H); 7.09 (d,  $J$  = 5.0 Hz, 2H); 7.05 (d,  $J$  = 5.0 Hz, 0.8H); 2.67 (h,  $J$  = 7.1 Hz, 1H); 2.58 (t,  $J$  = 7.7 Hz, 0.1H); 2.35–2.23 (m, 0.4H); 1.75–1.60 (m, 1H); 1.59–1.48 (m, 2.6H); 1.31–1.11 (m, 6H); 0.86 (t,  $J$  = 7.3 Hz, 3H); 0.75 (t,  $J$  = 7.3 Hz, 2.1H); 0.66 (t,  $J$  = 7.6 Hz, 0.2H).

$^{13}\text{C}\{\text{H}\}$  NMR (101 MHz,  $\text{CDCl}_3$ ):  $\delta$  156.7; 154.9; 149.6; 149.5; 129.3; 128.5; 126.8; 123.4; 122.6; 49.1; 39.8; 39.1; 37.9; 36.2; 35.2; 31.3; 29.9; 28.5; 27.6; 22.4; 21.4; 20.5; 14.0; 13.9; 11.9; 8.9.

HRMS (ESI):  $m/z$  calcd for  $\text{C}_{10}\text{H}_{15}\text{N}$ : 150.1283; found: 150.1283

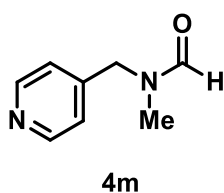

N-methyl-N-(pyridin-4-ylmethyl)formamide (**4m**): The compound **4m** (reported compound)<sup>7</sup> was obtained following the general procedure A using N,N-dimethylformamide (389  $\mu\text{L}$ , 5 mmol, 10 equiv.) as substrate. The compound **4m** was isolated by silica gel chromatography (DCM:MeOH = 99:1) and obtained as a yellow oil (32.3 mg, 43% yield).

$^1\text{H}$  NMR (400 MHz,  $\text{CDCl}_3$ ):  $\delta$  8.57, 8.53 (each bs, total 2H); 8.22, 8.16 (each s, total 1H); 7.12, 7.10 (each d,  $J$  = 5.9 Hz, total 2H); 4.48, 4.38 (each s, total 2H); 2.86, 2.77 (each s, total 3H).

$^{13}\text{C}\{\text{H}\}$  NMR (100 MHz,  $\text{CDCl}_3$ ):  $\delta$  162.8, 162.7; 150.2, 150.0; 145.0, 144.9; 129.2, 128.5; 122.7, 122.0; 52.2, 46.8; 34.2, 29.7.

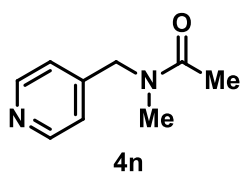

**N-methyl-N-(pyridin-4-ylmethyl)acetamide (4n):** The compound **4n** (unreported compound) was obtained following the general procedure A using N,N-dimethylacetamide (116  $\mu$ L, 1.25 mmol, 2.5 equiv.) as substrate. The compound **4n** was isolated by silica gel chromatography (DCM:MeOH = 99:1) and obtained as a yellow oil (45.5 mg, 55% yield).

$^1\text{H}$  NMR (400 MHz,  $\text{CDCl}_3$ ):  $\delta$  8.59, 8.53 (each d,  $J$  = 5.5 Hz, total 2H); 7.11, 7.08 (each d,  $J$  = 5.5 Hz, total 2H); 4.55, 4.50 (each s, total 2H); 2.94, 2.93 (each s, total 3H); 2.16, 2.07 (each s, total 3H).

$^{13}\text{C}\{\text{H}\}$  NMR (100 MHz,  $\text{CDCl}_3$ ):  $\delta$  170.9; 150.4, 150.0; 146.3, 145.8; 122.6, 121.1; 53.3, 49.9; 36.0, 34.0; 21.6, 21.3.

HRMS (ESI):  $m/z$  calcd for  $\text{C}_9\text{H}_{12}\text{N}_2\text{O}_1$ : 165.1028; found: 165.1025.

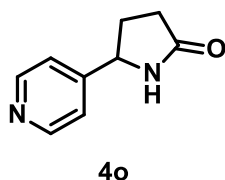

**5-(pyridin-4-yl)pyrrolidin-2-one (4o):** The compound **4o** (unreported compound) was obtained following the general procedure A using pyrrolidin-2-one (96  $\mu$ L, 1.25 mmol, 2.5 equiv.) as substrate. The compound **4o** was isolated by silica gel chromatography (pentane:DCM:MeOH = 4:5.5:0.5), and obtained as a brown solid (43.2 mg, 53% yield).

$^1\text{H}$  NMR (400 MHz,  $\text{CDCl}_3$ ):  $\delta$  8.54 (bs, 2H); 7.70 (bs, 1H); 7.19 (d,  $J$  = 5.3 Hz, 2H); 4.72 (t,  $J$  = 7.1 Hz, 1H); 2.64–2.53 (m, 1H); 2.42–2.35 (m, 2H); 1.93–1.83 (m, 1H).

$^{13}\text{C}\{\text{H}\}$  NMR (100 MHz,  $\text{CDCl}_3$ ):  $\delta$  179.1; 151.6; 150.1; 120.4; 56.9; 30.3; 29.9.

HRMS (ESI):  $m/z$  calcd for  $\text{C}_9\text{H}_{10}\text{N}_2\text{O}_1$ : 163.0871; found: 163.0866.

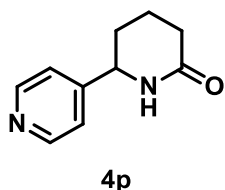

**6-(pyridin-4-yl)piperidin-2-one (4p)** The compound **4p** (unreported compound) was obtained following the general procedure A using piperidin-2-one (123.9 mg, 1.25 mmol, 2.5 equiv.) as substrate. The compound **4p** was isolated by silica gel chromatography (DCM:MeOH = 99:1) and obtained as a yellow oil (48.6 mg, 55% yield).

$^1\text{H}$  NMR (400 MHz,  $\text{CDCl}_3$ ):  $\delta$  8.62 (bs, 2H); 7.24 (d,  $J$  = 5.0 Hz, 2H); 6.10 (bs, 1H); 4.58 (dd,  $J$  = 7.5; 5.5 Hz, 1H); 2.50–2.42 (m, 2H); 2.20–2.11 (m, 1H); 1.88–1.78 (m, 2H); 1.73–1.66 (m, 1H).

$^{13}\text{C}\{\text{H}\}$  NMR (100 MHz,  $\text{CDCl}_3$ ):  $\delta$  172.3; 151.4; 150.3; 121.0; 56.6; 31.4; 31.3; 19.2.

HRMS (ESI):  $m/z$  calcd for  $\text{C}_{10}\text{H}_{12}\text{N}_2\text{O}_1$ : 177.1028; found: 177.1029.

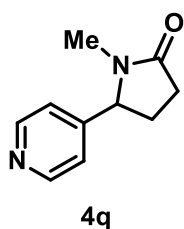

1-methyl-5-(pyridin-4-yl)pyrrolidin-2-one (**4q**): The compound **4q** (unreported compound) was obtained following the general procedure A using 1-methylpyrrolidin-2-one (120  $\mu$ L, 1.25 mmol, 2.5 equiv.) as substrate. Compound **4q** was isolated by silica gel chromatography (pentane:DCM:MeOH = 4:5.5:0.5) and obtained as a yellow oil (48.6 mg, 55% yield).

$^1\text{H}$  NMR (400 MHz,  $\text{CDCl}_3$ ):  $\delta$  8.57 (bs, 2H); 7.08 (d,  $J$  = 5.3 Hz, 2H); 4.47 (t,  $J$  = 6.4 Hz, 1H); 2.66 (s, 3H); 2.52–2.38 (m, 3H); 1.86–1.73 (m, 1H).

$^{13}\text{C}\{\text{H}\}$  NMR (100 MHz,  $\text{CDCl}_3$ ):  $\delta$  175.4; 150.4; 150.1; 121.1; 63.4; 29.5; 28.3; 27.7.

HRMS (ESI):  $m/z$  calcd for  $\text{C}_{10}\text{H}_{12}\text{N}_2\text{O}_1$ : 177.1028; found: 177.1029.

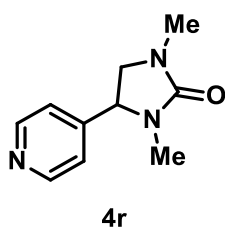

1,3-dimethyl-4-(pyridin-4-yl)imidazolidin-2-one (**4r**): The compound **4r** (unreported compound) was obtained following the general procedure A using 1,3-dimethylimidazolidin-2-one (135  $\mu$ L, 1.25 mmol, 2.5 equiv.) as substrate. The compound **4r** was isolated by silica gel chromatography (DCM:MeOH = 99.5:0.5  $\rightarrow$  98:2), and obtained as a colorless oil (21.8 mg, 23% yield).

$^1\text{H}$  NMR (400 MHz,  $\text{CDCl}_3$ ):  $\delta$  8.61 (bs, 2H); 7.22 (d,  $J$  = 5.7 Hz, 2H); 4.36 (t,  $J$  = 8.7 Hz, 1H); 3.67 (t,  $J$  = 8.7 Hz, 1H); 3.01 (t,  $J$  = 8.7 Hz, 1H); 2.81 (s, 3H); 2.64 (s, 3H).

$^{13}\text{C}\{\text{H}\}$  NMR (100 MHz,  $\text{CDCl}_3$ ):  $\delta$  161.5; 150.4; 148.6; 121.7; 59.5; 53.3; 31.2; 29.9.

HRMS (ESI):  $m/z$  calcd for  $\text{C}_{10}\text{H}_{13}\text{N}_3\text{O}_1$ : 192.1137; found: 192.1135.

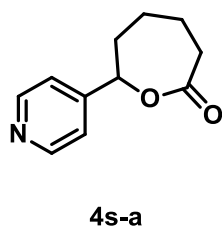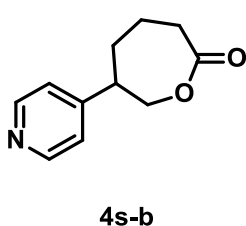

7-(pyridin-4-yl)oxepan-2-one (**4s-a**) and 6-(pyridin-4-yl)oxepan-2-one (**4s-b**): The compounds **4s-a** and **4s-b** (unreported compounds) were obtained following the general procedure A using oxepan-2-one (554  $\mu$ L, 5 mmol, 10 equiv.) as substrate. The compounds **4s-a** and **4s-b** were isolated as a yellow oil (22.1 mg, 23% yield) by silica gel chromatography (DCM:MeOH = 99.5:0.5) and obtained as an inseparable mixture of regioisomers (1:1 r.r.).

$^1\text{H}$  NMR (400 MHz,  $\text{CDCl}_3$ ):  $\delta$  8.63–8.45 (m, 2H); 7.15–7.06 (m, 2H); 4.43 – 4.35 (m, 1H); 4.35–4.25 (m, 1H); 3.10–2.70 (m, 3H); 2.18–1.76 (m, 4H).

$^{13}\text{C}\{\text{H}\}$  NMR (100 MHz,  $\text{CDCl}_3$ ):  $\delta$  175.0; 173.6; 153.8; 153.3; 150.2; 150.1; 122.0; 121.6; 68.9; 67.6; 46.3; 40.4; 39.8; 36.8; 35.8; 33.3; 29.4; 28.7.

HRMS (ESI):  $m/z$  calcd for  $C_{11}H_{13}N_1O_1$ : 192.1025; found: 192.1023.

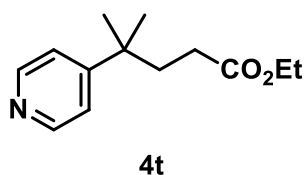

Ethyl 4-methyl-4-(pyridin-4-yl)pentanoate (**4t**): The compound **4t** (unreported compound) was obtained following the general procedure A using ethyl 4-methylpentanoate (829  $\mu$ L, 5 mmol, 10 equiv.) as substrate and 30 minutes of residence time. Compound

**4t** was isolated by silica gel chromatography (DCM:MeOH = 99.5:0.5), and obtained as a yellow oil (42.5 mg, 38% yield).

$^1\text{H}$  NMR (400 MHz,  $\text{CDCl}_3$ ):  $\delta$  8.50 (bs, 2H); 7.20 (d,  $J$  = 4.6 Hz, 2H); 4.01 (q,  $J$  = 7.1 Hz, 2H); 2.04 – 1.90 (m, 4H); 1.27 (s, 6H); 1.17 (t,  $J$  = 7.1 Hz, 3H).

$^{13}\text{C}\{\text{H}\}$  NMR (101 MHz,  $\text{CDCl}_3$ ):  $\delta$  173.3; 157.2; 149.7; 121.2; 60.3; 38.0; 37.2; 29.9; 27.8; 14.0.

HRMS (ESI):  $m/z$  calcd for  $C_{13}H_{19}N_1O_2$ : 222.1494; found: 222.1490.

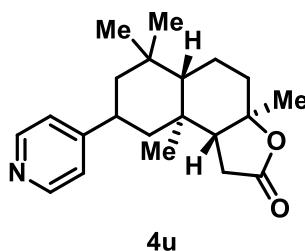

(3aR,5aS,9aS,9bR)-3a,6,6,9a-tetramethyl-8-(pyridin-4-yl)decahydronaphtho[2,1-b]furan-2(3aH)-one (**4u**): The compound **4u** (unreported compound) was obtained following the general procedure A using sclareolide (313.0 mg, 1.25 mmol, 2.5 equiv.) as substrate. The compound **4u** was isolated by silica gel chromatography (DCM:MeOH = 99.5:0.5), and obtained as a white solid

(45.1 mg, 28% yield).

$^1\text{H}$  NMR (400 MHz,  $\text{CDCl}_3$ ):  $\delta$  8.52 (bs, 2H); 7.13 (bs, 2H); 2.95 (tt,  $J$  = 12.7, 3.2 Hz, 1H); 2.47–2.36 (m, 1H); 2.22 (dd,  $J$  = 16.2, 6.4 Hz, 1H); 2.12 (dt,  $J$  = 11.9, 3.1 Hz, 1H); 2.04 (dd,  $J$  = 14.7, 6.4 Hz, 1H); 1.99–1.91 (m, 1H); 1.73 (td,  $J$  = 12.5, 4.0, 1H); 1.67–1.56 (m, 2H); 1.43–1.38 (m, 1H); 1.36 (s, 3H); 1.28–1.14 (m, 3H); 1.05 (s, 3H); 0.99–0.94 (m, 6H).

$^{13}\text{C}\{\text{H}\}$  NMR (100 MHz,  $\text{CDCl}_3$ ):  $\delta$  176.3; 154.9; 149.8; 122.5; 86.0; 58.9; 56.3; 48.9; 46.1; 38.6; 36.8; 35.1; 34.0; 33.0; 28.6; 21.6; 21.3; 20.4; 15.7.

HRMS (ESI):  $m/z$  calcd for  $C_{21}H_{29}N_1O_2$ : 328.2277; found: 328.2270.

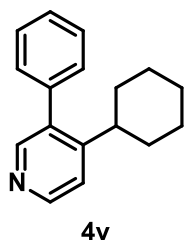

4-cyclohexyl-3-phenylpyridine (**4v**): The compound **4v** (reported compound) was obtained following the general procedure A using compound **1b** (0.5 mmol) and cyclohexane (541  $\mu$ L, 5 mmol, 10 equiv.) as substrate. The compound **4v** was isolated by silica gel chromatography (cyclohexane:ethyl acetate = 99:1 to 93:7) and obtained as a yellow oil (49.8 mg, 42% yield).

$^1\text{H}$  NMR (400 MHz,  $\text{CDCl}_3$ ):  $\delta$  8.49 (s, 1H); 8.38 (s, 1H); 7.50–7.35 (m, 3H); 7.30–7.19 (m, 2H, 1H); 2.65 (tt,  $J$  = 12.6, 12.1, 3.5 Hz, 2H); 1.76–1.62 (m, 5H), 1.46–1.33 (m, 2H), 1.29–1.08 (m, 3H).

$^{13}\text{C}\{\text{H}\}$  NMR (100 MHz,  $\text{CDCl}_3$ ):  $\delta$  153.9; 150.3; 148.6; 138.0; 129.4; 128.5; 128.3; 127.5; 126.5; 121.3; 39.6; 33.8; 26.4; 25.9.

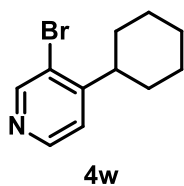

3-bromo-4-cyclohexylpyridine (**4w**): The compound **4w** (reported compound) was obtained following the general procedure A using compound **1c** (0.5 mmol) and cyclohexane (135  $\mu\text{L}$ , 1.25 mmol, 2.5 equiv.) as substrate. The compound **4w** was isolated by silica gel chromatography (pentane:ethyl acetate = 99:1 to 93:7) and obtained as a yellow oil (63.3 mg, 53% yield).

$^1\text{H}$  NMR (400 MHz,  $\text{CDCl}_3$ ):  $\delta$  8.64 (s, 1H); 8.41 (d,  $J$  = 5.1 Hz, 1H); 7.16 (d,  $J$  = 5.1 Hz, 1H); 2.91 (tt,  $J$  = 11.6, 3.1 Hz, 1H); 1.93–1.83 (m, 4H); 1.79 (d,  $J$  = 14.6 Hz, 1H); 1.52–1.19 (m, 6H).

$^{13}\text{C}\{\text{H}\}$  NMR (100 MHz,  $\text{CDCl}_3$ ):  $\delta$  154.8; 151.8; 148.4; 123.0; 122.4; 42.8; 32.3; 26.4; 25.9.

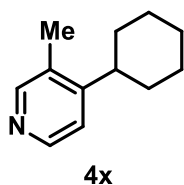

4-cyclohexyl-3-methylpyridine (**4x**): The compound **4x** (reported compound) was obtained following the general procedure A using compound **1d** (0.5 mmol) and cyclohexane (135  $\mu\text{L}$ , 1.25 mmol, 2.5 equiv.) as substrate. The compound **4x** was isolated by silica gel chromatography (pentane:ethyl acetate = 99.5:0.5) and obtained as a yellow oil (42.0 mg, 48% yield).

$^1\text{H}$  NMR (400 MHz,  $\text{CDCl}_3$ ):  $\delta$  8.35 (d, 1H, 1H); 7.10 (d,  $J$  = 5.1 Hz, 1H); 2.67 (tt,  $J$  = 11.0, 3.1 Hz, 1H); 2.29 (s, 3H); 1.93–1.75 (m, 6H); 1.49–1.32 (m, 4H); 1.31–1.22 (m, 1H).

$^{13}\text{C}\{\text{H}\}$  NMR (100 MHz,  $\text{CDCl}_3$ ):  $\delta$  154.4; 150.6; 147.7; 130.7; 39.8; 32.7; 26.8; 26.1; 16.0.

## 7 EXPERIMENTAL MECHANISTIC STUDIES

In order to get information about the mechanistic intricacies of the benzophenone-mediated Minisci reaction, we designed a couple of kinetic experiments. Due to the quick reaction times under standard microfluidic conditions, we modified slightly the reaction conditions and conduct all the following mechanistic studies in batch, using a NMR tube inside a home-made batch reactor. This reactor consisted in a 3D-printed (PLA) vessel, internally coated with a reflectant layer, and equipped with a PR160L Kessil lamp (390 nm, 40 W).<sup>8</sup> On top of it, a 3D-printed (PLA) lid with 8 holes was mounted; in this way, up to 8 reactions could be run simultaneously. Cooling was applied via a strong compressed air flow from below to keep the temperature below 30 °C.

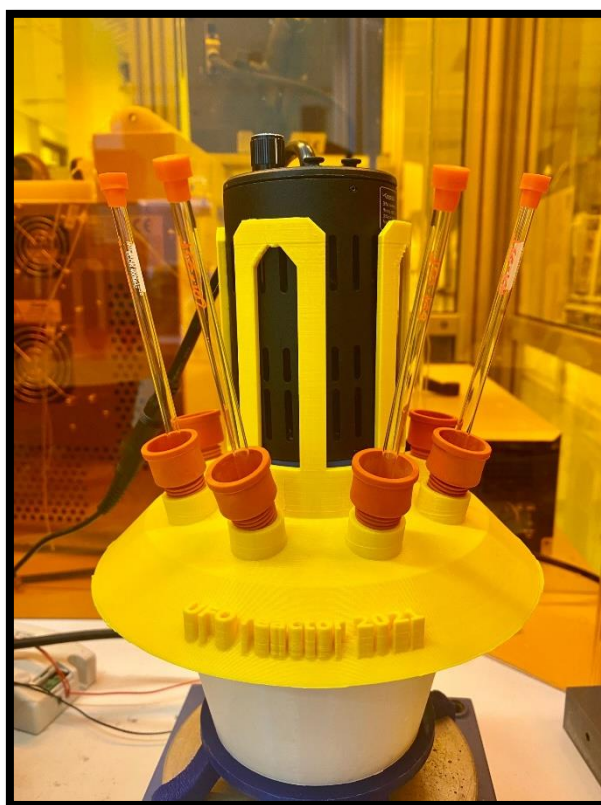

Figure S6. Picture of the 3D-printed batch reactor for the development of the kinetic studies.

All the following reactions in section 7 were monitored by  $^1\text{H}$  NMR spectroscopy and the data points were acquired as following: after an initial spectrum of the sample without light irradiation, the sample was irradiated for a short given amount of time, and the evolution was analyzed by  $^1\text{H}$  NMR spectroscopy. This procedure was repeated as many times as required in order to get the reaction profiles.

In order to test the viability of this procedure, and to check that the reaction only takes place under UV irradiation, an ON/OFF experiment was conducted next.

## 7.2 ON-OFF experiment

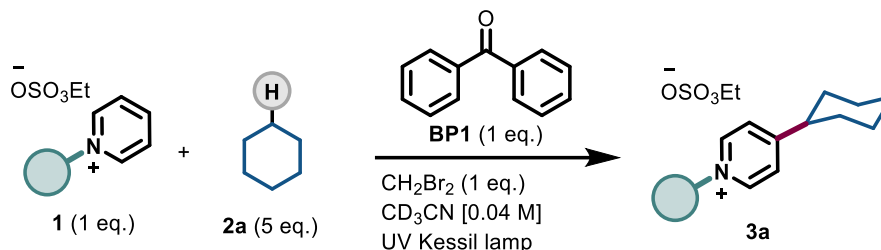

A NMR tube containing **1** (7.5 mg, 0.02 mmol), **2a** (10.8  $\mu\text{L}$ , 5 eq.), **BP1** (3.6 mg, 1 eq.) and internal standard  $\text{CH}_2\text{Br}_2$  (1.4  $\mu\text{L}$ , 0.02 mmol) in 0.5 mL of  $\text{CD}_3\text{CN}$  was prepared. The different spectra were acquired at the described times in Figure S7, turning ON/OFF the Kessil lamp when required. No evolution towards the product was observed in absence of UV light.

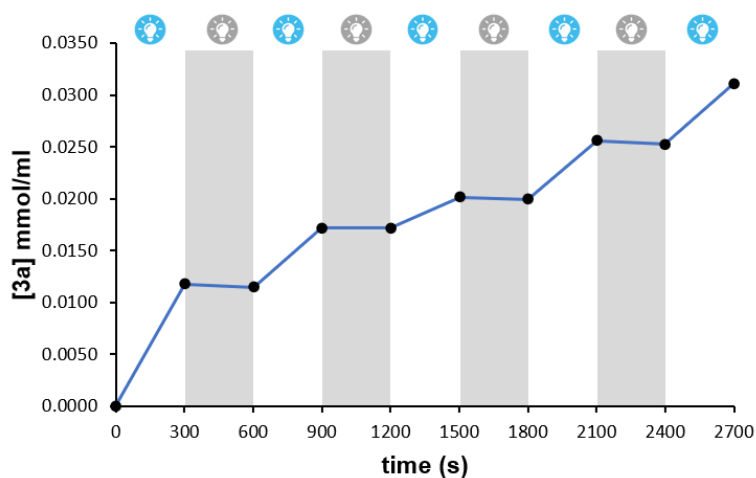

Figure S7. ON/OFF experiment profile.

## 7.3 Kinetic Orders

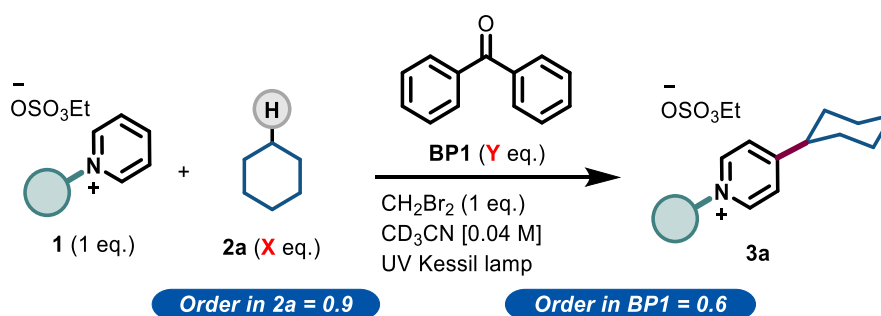

A stock solution containing **1** (75 mg, 0.1 mmol), internal standard  $\text{CH}_2\text{Br}_2$  (15  $\mu\text{L}$ , 0.1 mmol) in 5 mL of  $\text{CD}_3\text{CN}$  was prepared for all the following experiments. A 0.5 mL aliquot of the stock solution was then added to every NMR tube, already loaded with different amounts of **2a** (Table S1) or **BP1** (Table S2). The reaction mixtures were then inserted into the home-made photochemical batch reactor (Figure S6) and irradiated for a given amount of time. The evolution of the reactions were monitored directly by  $^1\text{H}$  NMR, in comparison with the internal standard. In order to obtain the experimental reaction rates ( $r_0$ , Tables S1 and S2), the initial rates method was applied, for which only the first ~30% of conversion towards product was taken into account (Figures S8 and S10).

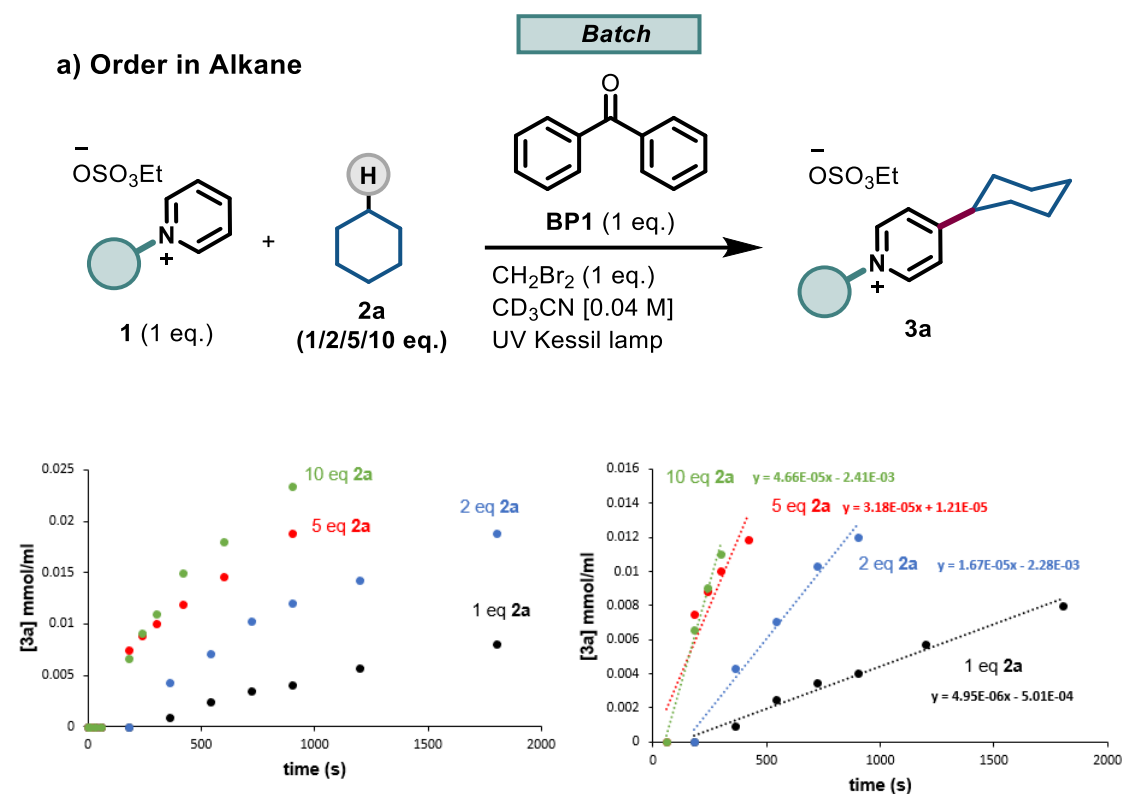

Figure S8. Concentration vs time plots for the formation of **3a**. Starting conditions  $[1]_0 = 0.04 \text{ M}$ ,  $[\text{BP1}]_0 = 0.04 \text{ M}$ .

Table S1. Initial rates for the formation of **3a** in  $\text{CD}_3\text{CN}$  at room temperature.<sup>a</sup>

| <b>2a</b> equivalents         | $[\text{2a}]_{\text{added}} \text{ mol L}^{-1}$ | $r_0/10^{-5} \text{ mol L}^{-1} \text{ s}^{-1}$ |
|-------------------------------|-------------------------------------------------|-------------------------------------------------|
| 1 equiv / 2.2 $\mu\text{L}$   | 0.04                                            | 0.49                                            |
| 2 equiv / 4.3 $\mu\text{L}$   | 0.08                                            | 1.67                                            |
| 5 equiv / 10.8 $\mu\text{L}$  | 0.2                                             | 3.18                                            |
| 10 equiv / 21.6 $\mu\text{L}$ | 0.4                                             | 4.66                                            |

<sup>a</sup> Up to 30% conversion.

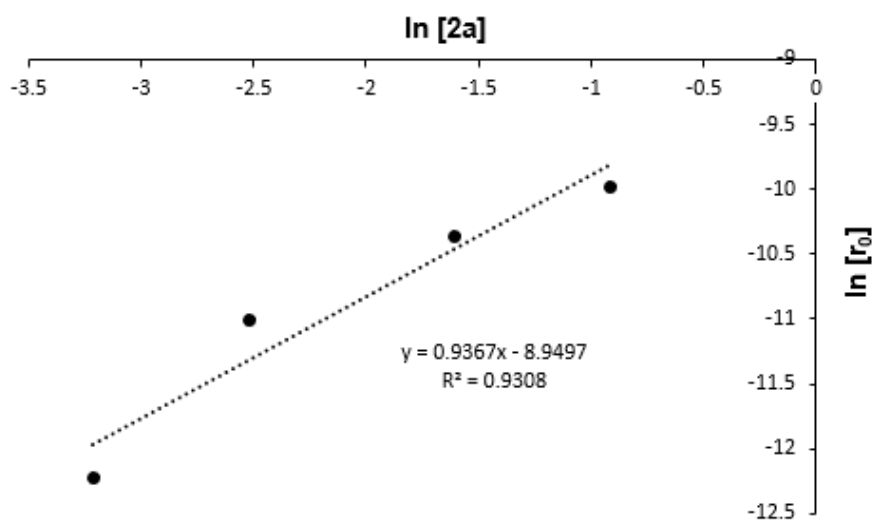

Figure S9. Plot of  $\ln(r_0)$  vs.  $\ln[\text{2a}]$ . The slope of the straight line is 0.9.

b) Order in Benzophenone

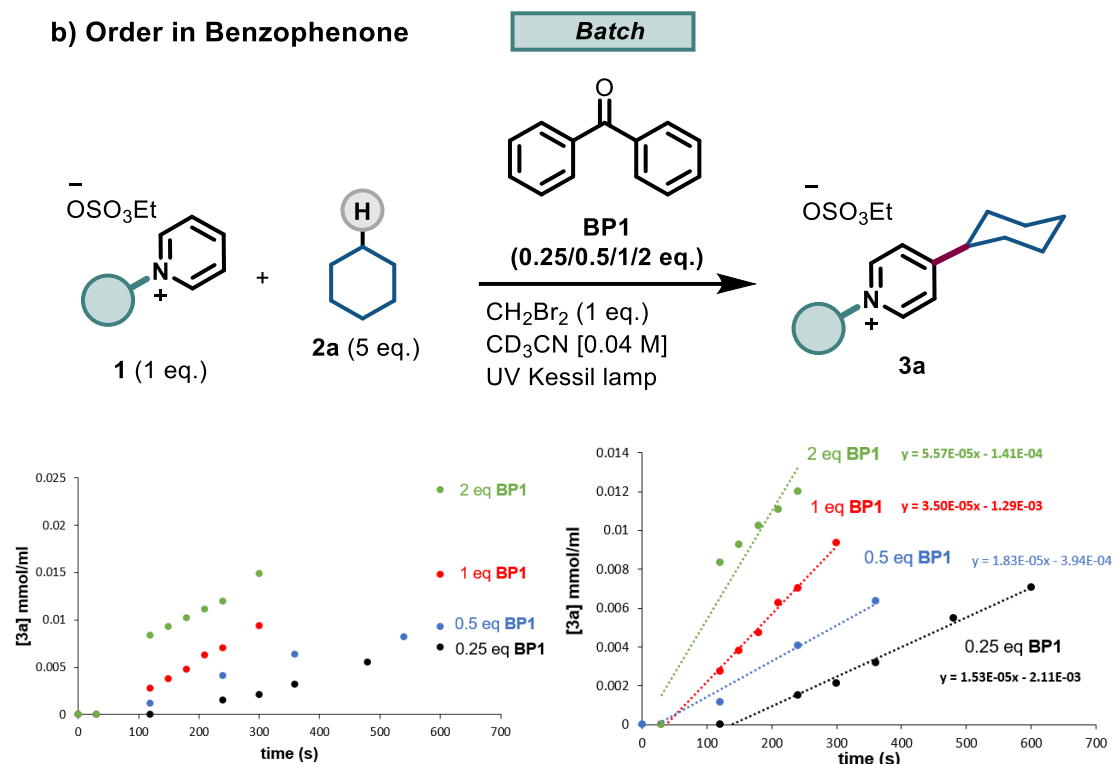

Figure S10. Concentration vs time plots for the formation of **3a**. Starting conditions  $[\mathbf{1}]_0 = 0.04 \text{ M}$ ,  $[\mathbf{2a}]_0 = 0.20 \text{ M}$ .

Table S2. Initial rates for the formation of **3a** in  $\text{CD}_3\text{CN}$  at room temperature.<sup>a</sup>

| <b>BP1</b> equivalents | $[\mathbf{BP1}]_{\text{added}} \text{ mol L}^{-1}$ | $r_0/10^{-5} \text{ mol L}^{-1} \text{ s}^{-1}$ |
|------------------------|----------------------------------------------------|-------------------------------------------------|
| 0.25 equiv / 0.9 mg    | 0.01                                               | 1.53                                            |
| 0.5 equiv / 1.8 mg     | 0.02                                               | 1.83                                            |
| 1 equiv / 3.6 mg       | 0.04                                               | 3.50                                            |
| 2 equiv / 7.2 mg       | 0.08                                               | 5.57                                            |

<sup>a</sup> Up to 30 conversion.

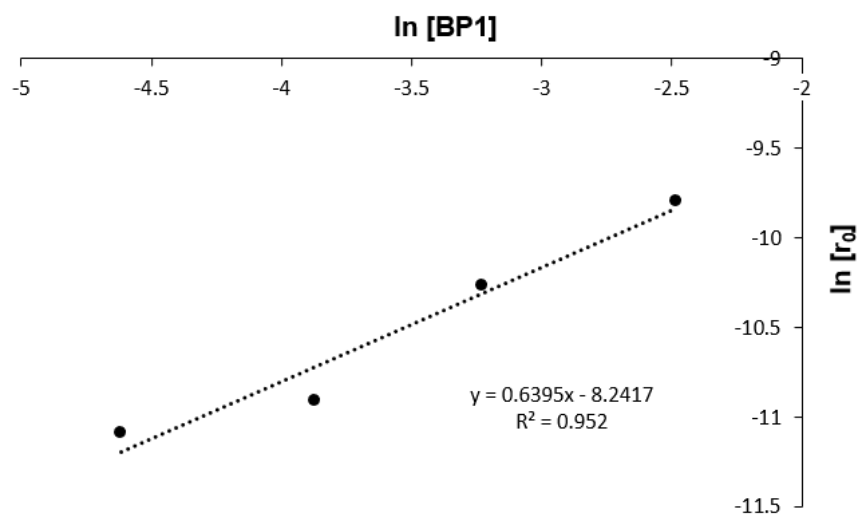

Figure S11. Plot of  $\ln(r_0)$  vs.  $\ln[\mathbf{2a}]$ . The slope of the straight line is 0.6.

## 7.4 Kinetic Isotope Effect

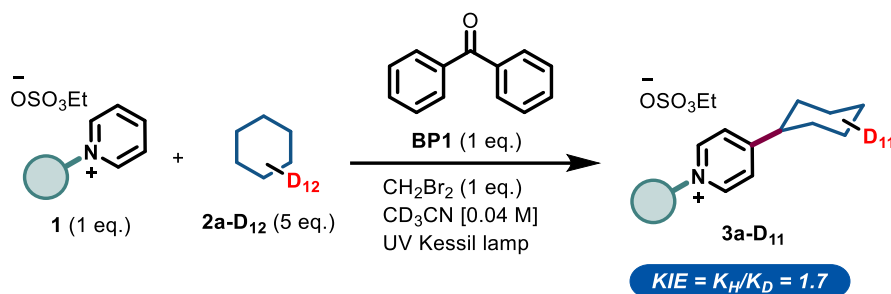

A stock solution containing **BP1** (14.4 mg, 0.03 mmol), internal standard  $\text{CH}_2\text{Br}_2$  (5.3  $\mu\text{L}$ , 0.03 mmol) in 2 mL of  $\text{CD}_3\text{CN}$  was prepared for the next experiments. A 0.5 mL aliquot of the stock solution was then added to every NMR tube, already loaded with the corresponding starting materials (Table S3). The reaction mixtures were then inserted into the home-made photochemical batch reactor (Figure S6) and irradiated for a given amount of time. The evolution of the reactions were monitored directly by  $^1\text{H}$  NMR, in comparison with the internal standard. In order to obtain the experimental reaction rates ( $r_0$ , Table S3), the initial rates method was applied, for which only the first ~30% of conversion towards product was taken into account (Figure S12). By comparison of the different reactions rates with the reference reaction, the kinetic isotope effects could be calculated.

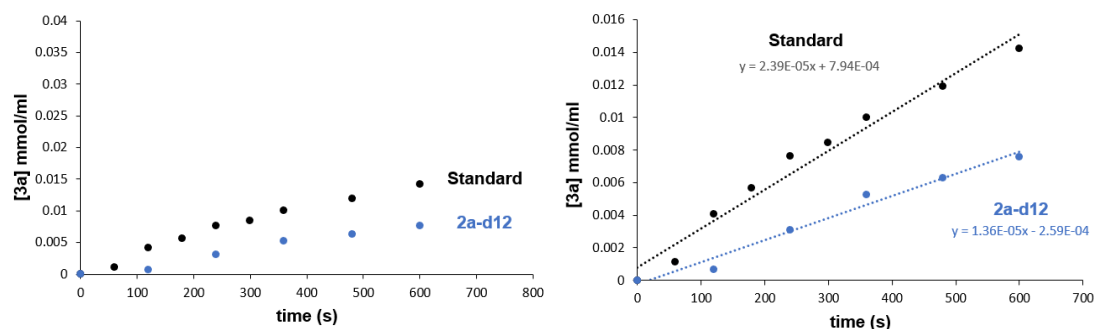

Figure S12. Concentration vs time plots for the formation of **3a**. Starting conditions  $[1]_0 = 0.04$  M,  $[2a]_0$  0.20 M.

Table S3. Initial rates for the formation of **3a** in  $\text{CD}_3\text{CN}$  at room temperature.<sup>a</sup>

| Reaction                 | $[1]_{\text{added}}$ mol L <sup>-1</sup> | $[2a]_{\text{added}}$ mol L <sup>-1</sup> | $r_0/10^{-5}$ mol L <sup>-1</sup> s <sup>-1</sup> |
|--------------------------|------------------------------------------|-------------------------------------------|---------------------------------------------------|
| Standard                 | 0.04                                     | 0.2                                       | 2.39                                              |
| <b>2a-d<sub>12</sub></b> | 0.04                                     | 0.2 ( <b>2a-D<sub>12</sub></b> )          | 1.43                                              |

<sup>a</sup> Up to 20% conversion.

$$\text{KIE} = K_H/K_D = 1.7$$

After comparing the initial rates of both reactions, we observed a small but not negligible kinetic isotope effect of 1.7. This might suggest that the C-H bond cleavage of the alkane is not rate-determining, but this elementary step could be in a prior equilibrium before the actual rate-determining step.

## 7.5 H/D scrambling

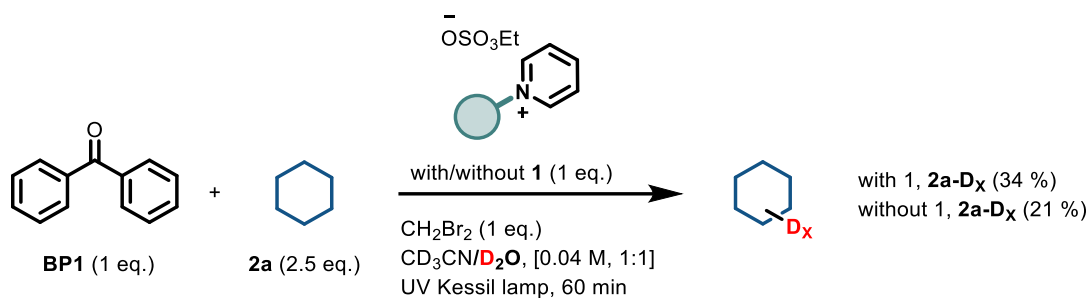

A stock solution containing **BP1** (10.8 mg, 0.06 mmol), **2a** (16.2  $\mu\text{L}$ , 0.15 mmol), and internal standard  $\text{CH}_2\text{Br}_2$  (4  $\mu\text{L}$ , 0.06 mmol) in 1.5 mL of a 1:1  $\text{CD}_3\text{CN}/\text{D}_2\text{O}$  mixture was prepared. 0.5 mL aliquots of this stock solution were then added to two NMR tubes, one already loaded with **1** (7.5 mg, 0.02 mmol). Both reaction mixtures were then inserted into a home-made photochemical batch reactor (Figure S6) and irradiated for 60 minutes. The deuteration of cyclohexane was monitored directly by  $^1\text{H}$  NMR, in comparison with the internal standard and the disappearance of the initial cyclohexane  $^1\text{H}$  NMR peaks.

In both cases we could observe the partial deuteration of cyclohexane, which indicates that the first step of the reaction, the benzophenone-mediated hydrogen atom transfer, is reversible under the following conditions.

## 7.6 Oxygen Effect in Flow

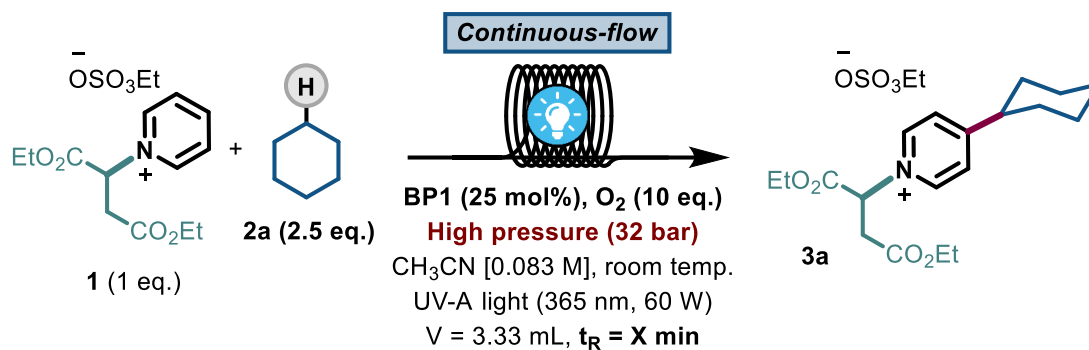

A stock solution containing **1** (94.4 mg, 0.25 mmol), **BP1** (11.4 mg, 25 mol%) and **2a** (68  $\mu$ L, 0.625 mmol, 2.5 equiv.) in 3 mL of CH<sub>3</sub>CN was prepared. To perform the reaction, the stock solution was first mixed with O<sub>2</sub> gas in a filling loop, after which the gas-liquid mixture was pumped over the photochemical reactor. For the loop filling, the stock solution was charged in a 5 mL syringe and the syringe was connected via a T-mixer with an oxygen line and a filling loop (PFA capillary: 0.8 mm ID, 10 mL), equipped with a switch valve on each side and a back-pressure regulator of 2.8 bar at the outlet (Figure S13A). Gas and liquid feed were pumped into the filling loop at 2.80 mL/min and 0.3 mL/min, respectively (10 equivalents of O<sub>2</sub>), to create a gas-liquid slug flow. After all the solution had been fed into the filling loop, the two switch valves were closed, containing the gas-liquid mixture inside the loop. To flow the mixture through the reactor, the reactor coil was first filled with solvent, with a 34 bar BPR at the outlet. Then the filling loop was connected to the reactor coil on one side and to an HPLC pump on the other side (Figure S13B). After opening the switch valves, the content of the filling loop was pumped through the Vapourtec reactor with a flow rate of 0.333 mL·min<sup>-1</sup> or 0.055 mL·min<sup>-1</sup> to achieve 10 min and 1 h residence time, respectively. The outflow was collected, all solvent was removed through rotary evaporation, and the crude mixture was analyzed via <sup>1</sup>H NMR to determine the reaction yield (with 1,3,5-trimethoxybenzene as external standard).

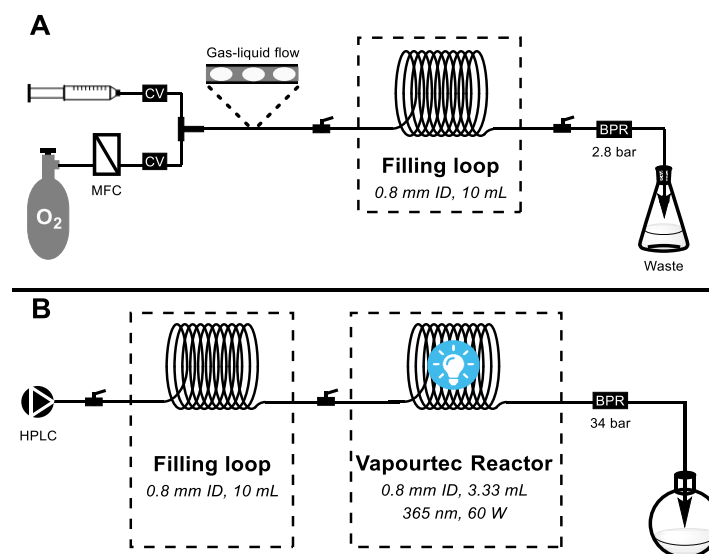

Figure S13: Overview of the procedure using 10 equivalents of O<sub>2</sub>(g) in continuous-flow. (A) Loop filling of gas-liquid mixture, (B) photochemical reaction of gas-liquid mixture in a Vapourtec reactor at 34 bar.

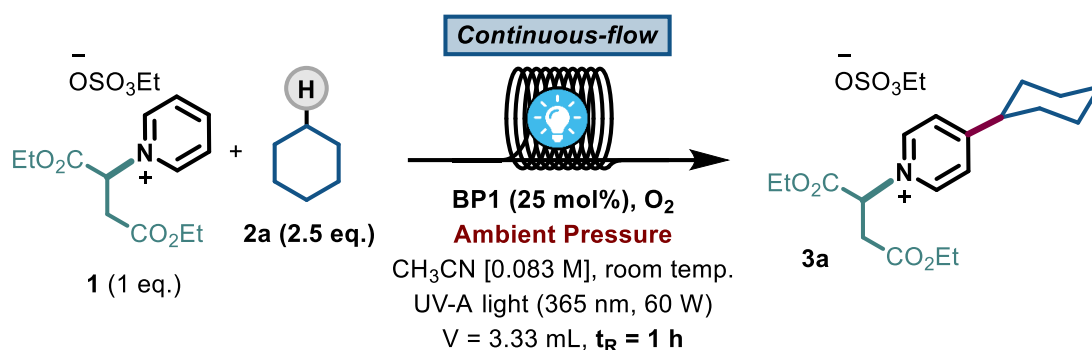

A stock solution containing **1** (94.4 mg, 0.25 mmol), **BP1** (11.4 mg, 25 mol%) and **2a** (68  $\mu$ L, 0.625 mmol, 2.5 equiv.) in 3 mL of CH<sub>3</sub>CN was prepared in a Pyrex glass vial, after which the vial was sealed with a rubber septum. The solution was sparged with O<sub>2</sub> and a O<sub>2</sub> filled balloon was inserted above the solution. The oxygen enriched solution was charged in a 5 mL syringe and was injected into a Vapourtec reactor with a flow rate of 0.055 mL·min<sup>-1</sup> to achieve 1 h residence time. The outflow was collected, all solvent was removed through rotary evaporation, and the crude mixture was analyzed via <sup>1</sup>H NMR to determine the reaction yield (with 1,3,5-trimethoxybenzene as external standard).

Table S4. Yields for the formation of **3a** under oxygen-enriched flow conditions and catalytic amounts of **BP1** (25 mol%).

| Entry | Pressure (bar) | Residence time (minutes) | Yield <sup>1</sup> (%) |
|-------|----------------|--------------------------|------------------------|
| 1     | 32             | 10                       | traces                 |
| 2     | 32             | 60                       | traces                 |
| 3     | Ambient        | 60                       | 23                     |

<sup>1</sup> Yield determined by quantitative <sup>1</sup>H NMR using 1,3,5-trimethoxybenzene as an internal standard.

Performing the Minisci reaction in flow with 10 eq. of O<sub>2</sub> under 34 bar pressure only gave trace amounts of product, after 10 and 60 minutes residence time (Table S4, entries 1 and 2). Oxygen has been shown to exhibit good quenching ability of the triplet excited state of benzophenone.<sup>9</sup> We reasoned that this interaction could explain the low conversion of pyridine under high O<sub>2</sub> concentrations, by effectively preventing the initial HAT event and therefore the overall reaction. So, we repeated the flow experiment at atmospheric pressure with an oxygen enriched solution (oxygen solubility in CH<sub>3</sub>CN under atmospheric pressure is 2.4 mM), which was prepared by sparging the stock solution with O<sub>2</sub> before charging in a syringe. Under these conditions, a yield of 23 was reached after 1 h residence time (Table S4), confirming that the concentration of O<sub>2</sub> has an important effect on reaction efficiency. This result demonstrates that benzophenone can also be used in catalytic amounts by working under the appropriate concentration of oxygen in the system.

## 7.7 Oxygen Effect in Batch

After the preliminary results observed in section 7.5 using oxygen, we wondered if we could promote a catalytic transformation to full conversion under longer reaction times. For practical reasons, namely very low flow rates required for long residence times in flow, we decided to switch to batch conditions.

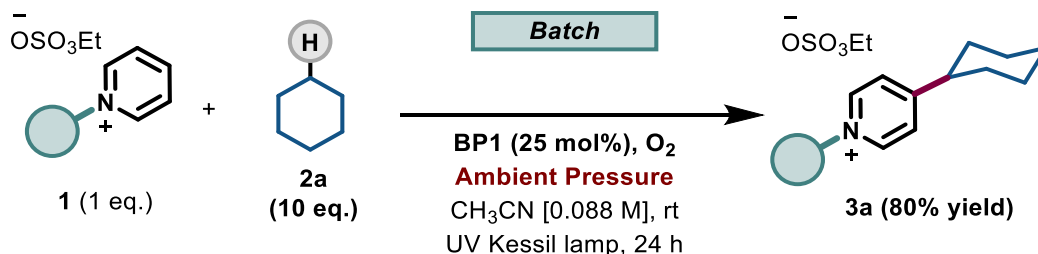

A stock solution containing **1** (188.7 mg, 0.5 mmol), **BP1** (22.8 mg, 25 mol%) and **2a** (540  $\mu$ L, 5 mmol, 10 equiv.) in 6 mL of CH<sub>3</sub>CN was prepared in a Pyrex glass vial, after which the vial was sealed with a rubber septum. The solution was sparged with O<sub>2</sub> and a O<sub>2</sub> filled balloon was inserted above the solution using a needle. The vial was then placed inside a home-made photochemical batch reactor (Figure S6) and it was irradiated for 24 h. Then, the solvent was removed through rotary evaporation and the crude mixture was analyzed via <sup>1</sup>H NMR using 1,3,5-trimethoxybenzene as external standard. We observed that after 24 h of irradiation, **3a** was formed in 65% yield. This result confirms that, given the proper reaction times and oxygen concentrations, benzophenone can be used in catalytic amounts. Nevertheless, this process is incompatible with fast and scalable reaction conditions, so given the cheap nature of benzophenone, working under stoichiometric conditions is more suitable in terms of productivity and scalability.

## 8 COMPUTATIONAL MECHANISTIC STUDIES

Density Functional Theory (DFT) calculations were run with the Gaussian 16 program package.<sup>10</sup> Geometry optimizations were performed with the  $\omega$ B97X-D functional<sup>11</sup> and 6-31+G(d,p) as the basis set.<sup>12</sup> All the stationary points were fully characterized via analytical frequency calculations as either minima (all positive eigenvalues) or transition states (one negative eigenvalue). Intrinsic reaction coordinate (IRC) calculations followed by geometry optimizations were used to confirm the minima linked between each transition state. Solvent effects were modeled using the conductor-like polarizable continuum model (CPCM)<sup>13</sup> for acetonitrile (CH<sub>3</sub>CN) and dispersion effects (D2) were already included in the functional used. Although this computation method has demonstrated to give reliable results in similar chemical systems,<sup>14</sup> we are also aware of the likely systematic error arisen from using DFT methods to calculate the stability of delocalized radicals. Therefore, the computational results herein described should be analyzed from a qualitative point of view.

The final energies reported are referring to free energies (298.15 K, 1 atm), and the 0.0 point is based on the triplet state excited benzophenone (**BP1\***).

In addition to the reaction profile described in the main text, a second possibility was also discovered and explored. In this alternative scenario, during the radical addition step, the cyclohexyl radical (**Cy2**) could also attack the activated pyridine ring (**Py1**) from *above*. A transition state for this process was also located (**TS2a**), although in a way higher energetic position in regard to the originally described **TS2b**. From this transition state, we could find another reaction intermediate **Py2a**, which could also be oxidized via the **TS3a** to give rise the same final product. Overall this pathway was discarded due to higher energetic barriers

All the raw data from the computational studies is available at the ioChem-BD repository<sup>15</sup> and can be accessed through <https://doi.org/10.19061/iochem-bd-6-156>.

## 8.1 Overall Free Energy Profiles

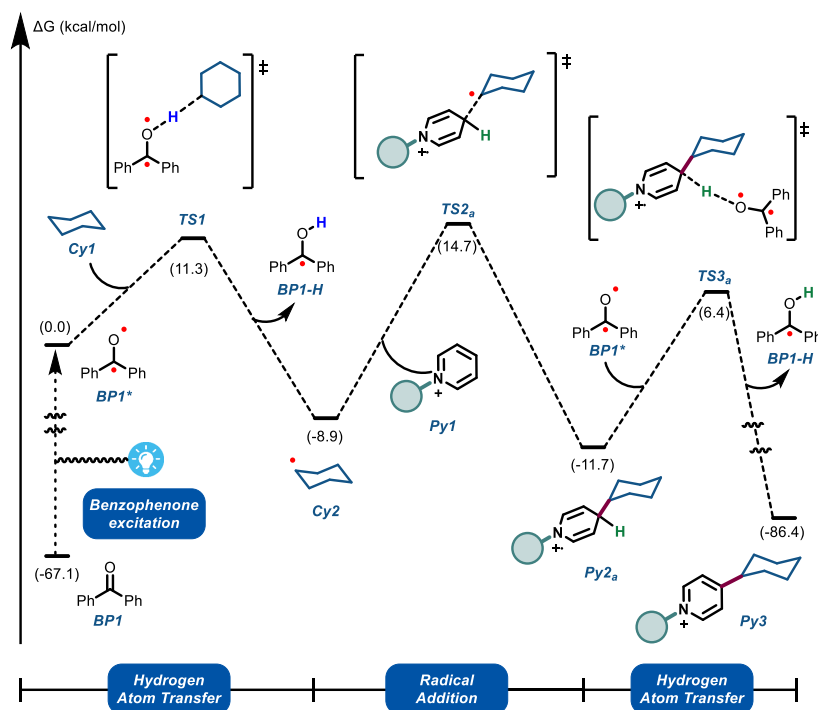

Figure S14. Alternative DFT profile for the radical addition towards **Py1** from *above*.

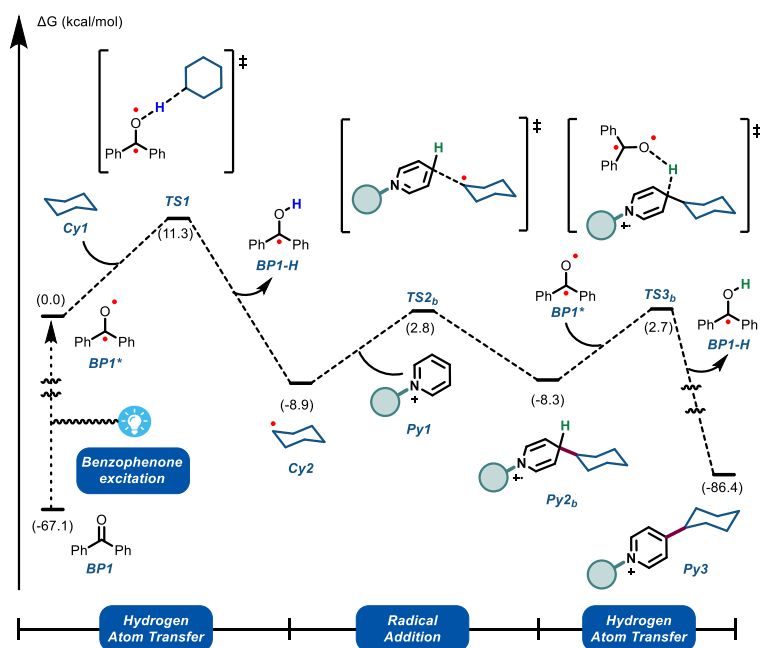

Figure S15. Main DFT profile for the radical addition towards **Py1** from *below*.

## 8.2 Cartesian Coordinates and Absolute Energies

The Gibbs free energies (in Hartree), and Cartesian coordinates (in Å) for all the optimized geometries at the  $\omega$ B97X-D/6-31+G(d,p)/CPCM(acetonitrile) level of theory are presented below:

### BP1

Energy (FREE) = -576.319323 Eh

|    | Atom | X       | Y       | Z      |
|----|------|---------|---------|--------|
| 1  | O    | 0.7119  | 2.9355  | 1.4848 |
| 2  | C    | 0.4110  | 1.7469  | 1.4761 |
| 3  | C    | -1.0244 | 1.3370  | 1.3942 |
| 4  | C    | -1.5006 | 0.1849  | 2.0311 |
| 5  | C    | -2.8564 | -0.1305 | 1.9827 |
| 6  | C    | -3.7393 | 0.6901  | 1.2826 |
| 7  | C    | -3.2694 | 1.8384  | 0.6429 |
| 8  | C    | -1.9200 | 2.1668  | 0.7087 |
| 9  | C    | 1.4783  | 0.7023  | 1.5473 |
| 10 | C    | 2.6584  | 0.9966  | 2.2411 |
| 11 | C    | 3.6888  | 0.0649  | 2.2976 |
| 12 | C    | 3.5580  | -1.1598 | 1.6405 |
| 13 | C    | 2.3936  | -1.4517 | 0.9322 |
| 14 | C    | 1.3513  | -0.5287 | 0.8929 |
| 15 | H    | -0.8193 | -0.4552 | 2.5822 |
| 16 | H    | -3.2219 | -1.0172 | 2.4899 |
| 17 | H    | -4.7938 | 0.4370  | 1.2367 |
| 18 | H    | -3.9559 | 2.4770  | 0.0966 |
| 19 | H    | -1.5461 | 3.0625  | 0.2234 |
| 20 | H    | 2.7540  | 1.9555  | 2.7400 |
| 21 | H    | 4.5946  | 0.2923  | 2.8502 |
| 22 | H    | 4.3650  | -1.8847 | 1.6792 |
| 23 | H    | 2.2949  | -2.3984 | 0.4115 |
| 24 | H    | 0.4493  | -0.7599 | 0.3354 |

## BP1\_star

Energy (FREE) = -576.212469 Eh

|    | Atom | X       | Y       | Z       |
|----|------|---------|---------|---------|
| 1  | O    | -0.0000 | 2.2537  | 0.0000  |
| 2  | C    | -0.0000 | 0.9238  | 0.0000  |
| 3  | C    | 1.3073  | 0.3027  | -0.0240 |
| 4  | C    | 1.4999  | -0.9858 | -0.5708 |
| 5  | C    | 2.7654  | -1.5538 | -0.5955 |
| 6  | C    | 3.8725  | -0.8506 | -0.1102 |
| 7  | C    | 3.6988  | 0.4358  | 0.4027  |
| 8  | C    | 2.4353  | 1.0120  | 0.4488  |
| 9  | C    | -1.3073 | 0.3027  | 0.0240  |
| 10 | C    | -2.4353 | 1.0120  | -0.4487 |
| 11 | C    | -3.6988 | 0.4357  | -0.4027 |
| 12 | C    | -3.8725 | -0.8506 | 0.1102  |
| 13 | C    | -2.7654 | -1.5539 | 0.5955  |
| 14 | C    | -1.4999 | -0.9858 | 0.5708  |
| 15 | H    | 0.6593  | -1.5280 | -0.9901 |
| 16 | H    | 2.8940  | -2.5482 | -1.0114 |
| 17 | H    | 4.8598  | -1.2997 | -0.1386 |
| 18 | H    | 4.5523  | 0.9908  | 0.7792  |
| 19 | H    | 2.3069  | 2.0018  | 0.8745  |
| 20 | H    | -2.3069 | 2.0018  | -0.8745 |
| 21 | H    | -4.5523 | 0.9908  | -0.7792 |
| 22 | H    | -4.8598 | -1.2997 | 0.1386  |
| 23 | H    | -2.8940 | -2.5482 | 1.0114  |
| 24 | H    | -0.6593 | -1.5281 | 0.9901  |

## BP1-H

Energy (FREE) = -576.879958 Eh

|    | Atom | X       | Y       | Z      |
|----|------|---------|---------|--------|
| 1  | O    | 0.5312  | 2.9282  | 1.4293 |
| 2  | C    | 0.2673  | 1.5893  | 1.4659 |
| 3  | C    | -1.1312 | 1.2538  | 1.4243 |
| 4  | C    | -1.6250 | 0.0116  | 1.8895 |
| 5  | C    | -2.9828 | -0.2747 | 1.8511 |
| 6  | C    | -3.8954 | 0.6636  | 1.3615 |
| 7  | C    | -3.4278 | 1.9035  | 0.9194 |
| 8  | C    | -2.0717 | 2.2006  | 0.9520 |
| 9  | C    | 1.3840  | 0.6720  | 1.5895 |
| 10 | C    | 2.5766  | 1.0828  | 2.2251 |
| 11 | C    | 3.6705  | 0.2288  | 2.3133 |
| 12 | C    | 3.6106  | -1.0552 | 1.7713 |
| 13 | C    | 2.4420  | -1.4737 | 1.1303 |
| 14 | C    | 1.3464  | -0.6261 | 1.0343 |
| 15 | H    | -0.9422 | -0.7187 | 2.3096 |
| 16 | H    | -3.3348 | -1.2336 | 2.2190 |
| 17 | H    | -4.9558 | 0.4347  | 1.3339 |
| 18 | H    | -4.1271 | 2.6439  | 0.5426 |
| 19 | H    | -1.7196 | 3.1640  | 0.6010 |
| 20 | H    | 2.6362  | 2.0636  | 2.6879 |
| 21 | H    | 4.5707  | 0.5650  | 2.8183 |
| 22 | H    | 4.4648  | -1.7205 | 1.8425 |
| 23 | H    | 2.3900  | -2.4638 | 0.6881 |
| 24 | H    | 0.4637  | -0.9558 | 0.4970 |
| 25 | H    | 1.4408  | 3.0824  | 1.1490 |

## Cy1

Energy (FREE) = -235.689705 Eh

|    | Atom | X       | Y       | Z       |
|----|------|---------|---------|---------|
| 1  | C    | -4.0309 | -2.3137 | 2.2876  |
| 2  | C    | -4.5127 | -0.9294 | 1.8402  |
| 3  | C    | -2.5295 | -2.3093 | 2.5949  |
| 4  | H    | -4.2313 | -3.0396 | 1.4867  |
| 5  | H    | -4.5967 | -2.6466 | 3.1653  |
| 6  | C    | -1.7174 | -1.7949 | 1.4013  |
| 7  | H    | -2.3427 | -1.6605 | 3.4625  |
| 8  | H    | -2.1968 | -3.3154 | 2.8746  |
| 9  | C    | -3.7006 | -0.4151 | 0.6467  |
| 10 | H    | -4.4065 | -0.2246 | 2.6771  |
| 11 | H    | -5.5787 | -0.9623 | 1.5875  |
| 12 | C    | -2.1992 | -0.4107 | 0.9539  |
| 13 | H    | -1.8236 | -2.4998 | 0.5644  |
| 14 | H    | -0.6514 | -1.7620 | 1.6540  |
| 15 | H    | -1.6335 | -0.0777 | 0.0762  |
| 16 | H    | -1.9989 | 0.3152  | 1.7548  |
| 17 | H    | -3.8875 | -1.0638 | -0.2209 |
| 18 | H    | -4.0333 | 0.5911  | 0.3669  |

## Cy2

Energy (FREE) = -235.036347 Eh

|    | Atom | X       | Y       | Z       |
|----|------|---------|---------|---------|
| 1  | C    | -4.0381 | -2.3586 | 2.2659  |
| 2  | C    | -4.5239 | -1.0786 | 1.6653  |
| 3  | C    | -2.5361 | -2.3056 | 2.5950  |
| 4  | H    | -4.1985 | -3.1838 | 1.5464  |
| 5  | H    | -4.6195 | -2.6167 | 3.1575  |
| 6  | C    | -1.7241 | -1.7935 | 1.4018  |
| 7  | H    | -2.3783 | -1.6346 | 3.4498  |
| 8  | H    | -2.1865 | -3.2987 | 2.8982  |
| 9  | C    | -3.7024 | -0.4292 | 0.5983  |
| 10 | H    | -5.5597 | -0.7793 | 1.8031  |
| 11 | C    | -2.2063 | -0.4098 | 0.9565  |
| 12 | H    | -1.8247 | -2.4994 | 0.5648  |
| 13 | H    | -0.6595 | -1.7564 | 1.6590  |
| 14 | H    | -1.6228 | -0.0589 | 0.0980  |
| 15 | H    | -2.0405 | 0.3066  | 1.7720  |
| 16 | H    | -3.8176 | -0.9941 | -0.3462 |
| 17 | H    | -4.0626 | 0.5842  | 0.3910  |

## Py1

Energy (FREE) = -861.259996 Eh

|    | Atom | X       | Y       | Z       |
|----|------|---------|---------|---------|
| 1  | O    | -0.7992 | 2.3312  | -0.7185 |
| 2  | C    | -0.0727 | 1.5158  | -0.1991 |
| 3  | C    | -0.5728 | 0.2874  | 0.5715  |
| 4  | C    | 0.3029  | -0.9561 | 0.3748  |
| 5  | C    | 1.5479  | -0.8484 | 1.2487  |
| 6  | O    | 2.7313  | -1.2321 | 0.7861  |
| 7  | C    | 2.9623  | -1.6738 | -0.5723 |
| 8  | C    | 2.5755  | -3.1259 | -0.7673 |
| 9  | O    | 1.4637  | -0.4499 | 2.3929  |
| 10 | N    | -1.9825 | 0.0290  | 0.2209  |
| 11 | C    | -2.3041 | -0.2774 | -1.0556 |
| 12 | C    | -3.6120 | -0.5285 | -1.4081 |
| 13 | C    | -4.6042 | -0.4583 | -0.4326 |
| 14 | C    | -4.2544 | -0.1372 | 0.8753  |
| 15 | C    | -2.9302 | 0.1044  | 1.1791  |
| 16 | O    | 1.2460  | 1.5469  | -0.1799 |
| 17 | C    | 1.9075  | 2.6712  | -0.8200 |
| 18 | C    | 3.3948  | 2.4394  | -0.6969 |
| 19 | H    | -0.5484 | 0.5504  | 1.6322  |
| 20 | H    | 0.5261  | -1.1160 | -0.6787 |
| 21 | H    | -0.2432 | -1.8333 | 0.7360  |
| 22 | H    | 4.0358  | -1.5368 | -0.7014 |
| 23 | H    | 2.4557  | -1.0008 | -1.2686 |
| 24 | H    | 3.1038  | -3.7605 | -0.0518 |
| 25 | H    | 2.8546  | -3.4367 | -1.7776 |
| 26 | H    | 1.5006  | -3.2870 | -0.6492 |
| 27 | H    | -1.4937 | -0.3136 | -1.7715 |
| 28 | H    | -3.8423 | -0.7727 | -2.4367 |
| 29 | H    | -5.6390 | -0.6506 | -0.6907 |
| 30 | H    | -4.9941 | -0.0711 | 1.6623  |
| 31 | H    | -2.5967 | 0.3582  | 2.1764  |
| 32 | H    | 1.5861  | 3.5830  | -0.3118 |
| 33 | H    | 1.5779  | 2.7074  | -1.8604 |
| 34 | H    | 3.6958  | 2.3795  | 0.3519  |
| 35 | H    | 3.9251  | 3.2744  | -1.1617 |
| 36 | H    | 3.6909  | 1.5183  | -1.2052 |

## Py2a

Energy (FREE) = -1096.300877 Eh

|    | Atom | X       | Y       | Z       |
|----|------|---------|---------|---------|
| 1  | O    | -1.4183 | -2.4683 | -0.6528 |
| 2  | C    | -2.1953 | -1.7417 | -0.0763 |
| 3  | C    | -1.7996 | -0.4233 | 0.6035  |
| 4  | C    | -2.6516 | 0.7601  | 0.1344  |
| 5  | C    | -2.3932 | 1.9901  | 0.9890  |
| 6  | O    | -2.9026 | 3.1566  | 0.6091  |
| 7  | C    | -3.6048 | 3.3461  | -0.6435 |
| 8  | C    | -2.6439 | 3.7335  | -1.7498 |
| 9  | O    | -1.7649 | 1.9297  | 2.0269  |
| 10 | N    | -0.3637 | -0.1843 | 0.4168  |
| 11 | C    | 0.1391  | 0.0224  | -0.8432 |
| 12 | C    | 1.4630  | 0.2303  | -1.0454 |
| 13 | C    | 2.4584  | 0.1793  | 0.0530  |
| 14 | C    | 1.7968  | 0.0499  | 1.3732  |
| 15 | C    | 0.4597  | -0.1439 | 1.5087  |
| 16 | O    | -3.4852 | -1.9646 | 0.0893  |
| 17 | C    | -4.0248 | -3.1915 | -0.4714 |
| 18 | C    | -5.5077 | -3.2021 | -0.1852 |
| 19 | H    | -1.9613 | -0.5593 | 1.6745  |
| 20 | H    | -3.7039 | 0.4798  | 0.2421  |
| 21 | H    | -2.4932 | 0.9677  | -0.9257 |
| 22 | H    | -4.3027 | 4.1555  | -0.4300 |
| 23 | H    | -4.1891 | 2.4571  | -0.8888 |
| 24 | H    | -2.0893 | 4.6341  | -1.4759 |
| 25 | H    | -3.2116 | 3.9394  | -2.6612 |
| 26 | H    | -1.9270 | 2.9372  | -1.9693 |
| 27 | H    | -0.5719 | 0.0111  | -1.6579 |
| 28 | H    | 1.7949  | 0.4131  | -2.0598 |
| 29 | H    | 3.0351  | 1.1191  | 0.0496  |
| 30 | H    | 2.3905  | 0.1088  | 2.2768  |
| 31 | H    | -0.0205 | -0.2513 | 2.4712  |
| 32 | H    | -3.5072 | -4.0318 | -0.0032 |
| 33 | H    | -3.8109 | -3.1956 | -1.5424 |
| 34 | H    | -5.6995 | -3.1823 | 0.8904  |
| 35 | H    | -5.9422 | -4.1170 | -0.5961 |
| 36 | H    | -6.0023 | -2.3462 | -0.6513 |
| 37 | H    | 4.9157  | -1.6372 | -1.6746 |
| 38 | H    | 5.8755  | 0.5449  | -2.2970 |
| 39 | H    | 3.6771  | -0.6103 | -2.3582 |
| 40 | C    | 4.3314  | -0.7270 | -1.4895 |
| 41 | C    | 5.2921  | 0.4617  | -1.3742 |
| 42 | H    | 6.9033  | -0.5357 | -0.3483 |
| 43 | C    | 6.2281  | 0.3123  | -0.1702 |
| 44 | C    | 3.5273  | -0.9732 | -0.2016 |
| 45 | H    | 4.7274  | 1.3999  | -1.2879 |
| 46 | H    | 6.8569  | 1.2030  | -0.0678 |
| 47 | H    | 2.9484  | -1.8967 | -0.3099 |
| 48 | H    | 5.1002  | -2.0327 | 0.7649  |
| 49 | C    | 4.5040  | -1.1354 | 0.9742  |

|    |   |        |         |        |
|----|---|--------|---------|--------|
| 50 | C | 5.4507 | 0.0592  | 1.1259 |
| 51 | H | 6.1446 | -0.1285 | 1.9516 |
| 52 | H | 3.9751 | -1.3401 | 1.9093 |
| 53 | H | 4.8859 | 0.9608  | 1.4003 |

## Py2b

Energy (FREE) = -1096.295489 Eh

|    | Atom | X       | Y       | Z       |
|----|------|---------|---------|---------|
| 1  | O    | -3.0752 | -2.1001 | -0.6399 |
| 2  | C    | -3.1340 | -1.0148 | -0.1077 |
| 3  | C    | -1.9325 | -0.3038 | 0.5263  |
| 4  | C    | -1.7924 | 1.1623  | 0.1000  |
| 5  | C    | -0.7812 | 1.8836  | 0.9797  |
| 6  | O    | -0.2954 | 3.0548  | 0.5861  |
| 7  | C    | -0.5789 | 3.6409  | -0.7077 |
| 8  | C    | 0.4226  | 3.1731  | -1.7450 |
| 9  | O    | -0.4318 | 1.4320  | 2.0522  |
| 10 | N    | -0.6952 | -1.0438 | 0.2488  |
| 11 | C    | -0.2976 | -1.2408 | -1.0544 |
| 12 | C    | 0.9184  | -1.7628 | -1.3377 |
| 13 | C    | 1.9081  | -2.0918 | -0.2836 |
| 14 | C    | 1.3139  | -2.0030 | 1.0716  |
| 15 | C    | 0.0829  | -1.4689 | 1.2895  |
| 16 | O    | -4.2256 | -0.2923 | 0.0552  |
| 17 | C    | -5.4720 | -0.8523 | -0.4387 |
| 18 | C    | -6.5628 | 0.1495  | -0.1431 |
| 19 | H    | -2.0875 | -0.3351 | 1.6068  |
| 20 | H    | -2.7617 | 1.6550  | 0.2237  |
| 21 | H    | -1.5369 | 1.2326  | -0.9588 |
| 22 | H    | -0.4866 | 4.7123  | -0.5313 |
| 23 | H    | -1.6120 | 3.4370  | -0.9966 |
| 24 | H    | 1.4427  | 3.3781  | -1.4107 |
| 25 | H    | 0.2486  | 3.7118  | -2.6802 |
| 26 | H    | 0.3330  | 2.1027  | -1.9519 |
| 27 | H    | -1.0038 | -0.9577 | -1.8225 |
| 28 | H    | 1.1945  | -1.8983 | -2.3771 |
| 29 | H    | 1.8878  | -2.3223 | 1.9331  |
| 30 | H    | -0.3301 | -1.3342 | 2.2793  |
| 31 | H    | -5.6375 | -1.8055 | 0.0684  |
| 32 | H    | -5.3581 | -1.0356 | -1.5094 |
| 33 | H    | -6.6501 | 0.3278  | 0.9315  |
| 34 | H    | -7.5155 | -0.2453 | -0.5055 |
| 35 | H    | -6.3693 | 1.0994  | -0.6476 |
| 36 | C    | 3.1840  | -1.1667 | -0.4324 |
| 37 | C    | 4.3849  | -1.7247 | 0.3587  |
| 38 | H    | 4.0507  | -2.2045 | 1.2848  |
| 39 | H    | 4.8645  | -2.5061 | -0.2409 |
| 40 | C    | 5.4023  | -0.6192 | 0.7038  |
| 41 | H    | 5.1308  | -0.1492 | 1.6570  |
| 42 | H    | 6.3920  | -1.0635 | 0.8466  |
| 43 | C    | 5.4390  | 0.4529  | -0.3870 |
| 44 | H    | 6.2421  | 1.1707  | -0.1941 |
| 45 | H    | 5.6749  | -0.0256 | -1.3460 |
| 46 | C    | 4.0843  | 1.1866  | -0.4818 |
| 47 | H    | 4.0959  | 2.0791  | 0.1528  |
| 48 | H    | 3.9256  | 1.5337  | -1.5087 |
| 49 | C    | 2.9068  | 0.2900  | -0.0531 |

|    |   |        |         |         |
|----|---|--------|---------|---------|
| 50 | H | 2.7555 | 0.3558  | 1.0314  |
| 51 | H | 1.9841 | 0.6476  | -0.5217 |
| 52 | H | 3.4282 | -1.1976 | -1.5013 |
| 53 | H | 2.2881 | -3.1127 | -0.4501 |

# Py3

Energy (FREE) = -1095.752481 Eh

|    | Atom | X       | Y       | Z       |
|----|------|---------|---------|---------|
| 1  | O    | -1.2978 | -2.4593 | -0.2413 |
| 2  | C    | -1.9819 | -1.5229 | 0.1020  |
| 3  | C    | -1.4252 | -0.2218 | 0.6926  |
| 4  | C    | -2.1802 | 1.0312  | 0.2311  |
| 5  | C    | -3.4851 | 1.1634  | 1.0082  |
| 6  | O    | -4.6070 | 1.5115  | 0.3895  |
| 7  | C    | -4.7210 | 1.6754  | -1.0434 |
| 8  | C    | -4.2407 | 3.0394  | -1.4964 |
| 9  | O    | -3.5043 | 0.9935  | 2.2107  |
| 10 | N    | 0.0171  | -0.1315 | 0.4082  |
| 11 | C    | 0.4463  | -0.0337 | -0.8689 |
| 12 | C    | 1.7886  | 0.0561  | -1.1547 |
| 13 | C    | 2.7361  | 0.0374  | -0.1242 |
| 14 | C    | 2.2547  | -0.0743 | 1.1871  |
| 15 | C    | 0.9036  | -0.1555 | 1.4278  |
| 16 | O    | -3.2995 | -1.4633 | 0.0546  |
| 17 | C    | -4.0129 | -2.6315 | -0.4321 |
| 18 | C    | -5.4843 | -2.2912 | -0.4164 |
| 19 | H    | -1.5335 | -0.2963 | 1.7776  |
| 20 | H    | -2.3186 | 1.0314  | -0.8486 |
| 21 | H    | -1.5863 | 1.9131  | 0.4914  |
| 22 | H    | -5.7896 | 1.5603  | -1.2250 |
| 23 | H    | -4.2078 | 0.8539  | -1.5494 |
| 24 | H    | -4.7776 | 3.8286  | -0.9646 |
| 25 | H    | -4.4362 | 3.1486  | -2.5665 |
| 26 | H    | -3.1682 | 3.1761  | -1.3330 |
| 27 | H    | -0.3090 | -0.0298 | -1.6439 |
| 28 | H    | 2.0937  | 0.1380  | -2.1908 |
| 29 | H    | 2.9278  | -0.0991 | 2.0352  |
| 30 | H    | 0.4946  | -0.2384 | 2.4261  |
| 31 | H    | -3.7735 | -3.4693 | 0.2264  |
| 32 | H    | -3.6491 | -2.8531 | -1.4377 |
| 33 | H    | -5.8181 | -2.0459 | 0.5948  |
| 34 | H    | -6.0536 | -3.1551 | -0.7685 |
| 35 | H    | -5.6979 | -1.4467 | -1.0763 |
| 36 | C    | 4.2073  | 0.1301  | -0.4151 |
| 37 | C    | 4.9297  | -1.2025 | -0.0769 |
| 38 | H    | 4.4730  | -1.6607 | 0.8073  |
| 39 | H    | 4.7770  | -1.8999 | -0.9072 |
| 40 | C    | 6.4343  | -0.9876 | 0.1759  |
| 41 | H    | 6.6071  | -0.7856 | 1.2400  |
| 42 | H    | 6.9783  | -1.9076 | -0.0586 |
| 43 | C    | 6.9705  | 0.1857  | -0.6456 |
| 44 | H    | 8.0577  | 0.2593  | -0.5461 |
| 45 | H    | 6.7691  | -0.0019 | -1.7078 |
| 46 | C    | 6.3093  | 1.5088  | -0.2065 |
| 47 | H    | 6.9100  | 1.9839  | 0.5762  |
| 48 | H    | 6.2850  | 2.2050  | -1.0516 |
| 49 | C    | 4.8795  | 1.2982  | 0.3286  |

|    |   |        |        |         |
|----|---|--------|--------|---------|
| 50 | H | 4.9080 | 1.0725 | 1.4013  |
| 51 | H | 4.2920 | 2.2144 | 0.2144  |
| 52 | H | 4.3122 | 0.3187 | -1.4893 |

## TS1

Energy (FREE) = -811.884175 Eh

|    | Atom | X       | Y       | Z       |
|----|------|---------|---------|---------|
| 1  | O    | 0.0637  | -1.0923 | 1.1334  |
| 2  | C    | 0.9311  | -0.3104 | 0.4634  |
| 3  | C    | 2.1384  | -0.9838 | 0.0550  |
| 4  | C    | 3.3423  | -0.2817 | -0.2018 |
| 5  | C    | 4.4900  | -0.9599 | -0.5837 |
| 6  | C    | 4.4909  | -2.3542 | -0.7014 |
| 7  | C    | 3.3196  | -3.0636 | -0.4268 |
| 8  | C    | 2.1597  | -2.3967 | -0.0540 |
| 9  | C    | 0.6524  | 1.1107  | 0.3186  |
| 10 | C    | -0.0587 | 1.8051  | 1.3183  |
| 11 | C    | -0.3667 | 3.1512  | 1.1663  |
| 12 | C    | 0.0242  | 3.8410  | 0.0168  |
| 13 | C    | 0.7314  | 3.1662  | -0.9802 |
| 14 | C    | 1.0414  | 1.8189  | -0.8358 |
| 15 | H    | 3.3743  | 0.7958  | -0.0820 |
| 16 | H    | 5.3993  | -0.3992 | -0.7782 |
| 17 | H    | 5.3938  | -2.8784 | -0.9975 |
| 18 | H    | 3.3081  | -4.1460 | -0.5131 |
| 19 | H    | 1.2501  | -2.9557 | 0.1366  |
| 20 | H    | -0.3622 | 1.2809  | 2.2186  |
| 21 | H    | -0.9117 | 3.6670  | 1.9509  |
| 22 | H    | -0.2219 | 4.8912  | -0.1019 |
| 23 | H    | 1.0299  | 3.6890  | -1.8837 |
| 24 | H    | 1.5590  | 1.2987  | -1.6355 |
| 25 | C    | -3.1711 | -1.6788 | 0.8322  |
| 26 | C    | -4.6362 | -1.4972 | 0.3949  |
| 27 | C    | -2.4226 | -0.3657 | 0.6902  |
| 28 | H    | -2.6987 | -2.4365 | 0.1933  |
| 29 | H    | -3.1230 | -2.0419 | 1.8636  |
| 30 | C    | -2.4785 | 0.2104  | -0.7127 |
| 31 | H    | -2.7260 | 0.3684  | 1.4471  |
| 32 | H    | -1.2983 | -0.5953 | 0.9578  |
| 33 | C    | -4.7229 | -0.9279 | -1.0237 |
| 34 | H    | -5.1380 | -0.8138 | 1.0929  |
| 35 | H    | -5.1580 | -2.4582 | 0.4571  |
| 36 | C    | -3.9450 | 0.3851  | -1.1473 |
| 37 | H    | -3.9783 | 0.7575  | -2.1768 |
| 38 | H    | -4.4176 | 1.1487  | -0.5150 |
| 39 | H    | -4.3114 | -1.6598 | -1.7323 |
| 40 | H    | -5.7710 | -0.7708 | -1.3016 |
| 41 | H    | -1.9758 | -0.4750 | -1.4081 |
| 42 | H    | -1.9517 | 1.1684  | -0.7586 |

## TS2a

Energy (FREE) = -1096.258814 Eh

|    | Atom | X       | Y       | Z       |
|----|------|---------|---------|---------|
| 1  | O    | -0.7138 | 2.3131  | 0.5366  |
| 2  | C    | -1.6532 | 1.7917  | -0.0163 |
| 3  | C    | -1.6295 | 0.3834  | -0.6225 |
| 4  | C    | -2.7698 | -0.5029 | -0.1198 |
| 5  | C    | -2.8666 | -1.7691 | -0.9573 |
| 6  | O    | -3.6600 | -2.7551 | -0.5486 |
| 7  | C    | -4.3546 | -2.7290 | 0.7168  |
| 8  | C    | -3.4992 | -3.3237 | 1.8184  |
| 9  | O    | -2.2688 | -1.8904 | -2.0050 |
| 10 | N    | -0.3115 | -0.2249 | -0.3970 |
| 11 | C    | 0.1303  | -0.4245 | 0.8748  |
| 12 | C    | 1.3700  | -0.9450 | 1.1137  |
| 13 | C    | 2.2396  | -1.1988 | 0.0290  |
| 14 | C    | 1.7036  | -1.1143 | -1.2746 |
| 15 | C    | 0.4514  | -0.5965 | -1.4584 |
| 16 | O    | -2.8370 | 2.3445  | -0.2151 |
| 17 | C    | -3.0176 | 3.6938  | 0.2828  |
| 18 | C    | -4.4420 | 4.0961  | -0.0186 |
| 19 | H    | -1.7444 | 0.5001  | -1.7016 |
| 20 | H    | -3.7059 | 0.0546  | -0.2199 |
| 21 | H    | -2.6556 | -0.7291 | 0.9425  |
| 22 | H    | -5.2428 | -3.3371 | 0.5439  |
| 23 | H    | -4.6881 | -1.7156 | 0.9502  |
| 24 | H    | -3.1942 | -4.3391 | 1.5560  |
| 25 | H    | -4.0781 | -3.3631 | 2.7445  |
| 26 | H    | -2.5995 | -2.7307 | 2.0053  |
| 27 | H    | -0.5458 | -0.1528 | 1.6733  |
| 28 | H    | 1.6840  | -1.1105 | 2.1356  |
| 29 | H    | 3.1649  | -1.7359 | 0.1957  |
| 30 | H    | 2.2786  | -1.4201 | -2.1386 |
| 31 | H    | 0.0005  | -0.4817 | -2.4339 |
| 32 | H    | -2.2913 | 4.3407  | -0.2146 |
| 33 | H    | -2.8063 | 3.6934  | 1.3546  |
| 34 | H    | -4.6334 | 4.0774  | -1.0940 |
| 35 | H    | -4.6125 | 5.1122  | 0.3449  |
| 36 | H    | -5.1489 | 3.4281  | 0.4790  |
| 37 | H    | 4.6166  | 1.7360  | 1.5845  |
| 38 | H    | 5.9735  | -0.1388 | 2.3160  |
| 39 | H    | 3.5248  | 0.5293  | 2.2292  |
| 40 | C    | 4.2170  | 0.7237  | 1.4037  |
| 41 | C    | 5.3835  | -0.2724 | 1.4045  |
| 42 | H    | 6.7403  | 0.8868  | 0.1913  |
| 43 | C    | 6.2665  | -0.1037 | 0.1653  |
| 44 | C    | 3.4874  | 0.7816  | 0.0976  |
| 45 | H    | 4.9945  | -1.2982 | 1.4369  |
| 46 | H    | 7.0740  | -0.8423 | 0.1772  |
| 47 | H    | 2.5711  | 1.3689  | 0.0798  |
| 48 | H    | 4.7210  | 1.7890  | -1.2677 |
| 49 | C    | 4.2994  | 0.7754  | -1.1590 |

|    |   |        |         |         |
|----|---|--------|---------|---------|
| 50 | C | 5.4508 | -0.2362 | -1.1236 |
| 51 | H | 6.0908 | -0.0914 | -1.9989 |
| 52 | H | 3.6592 | 0.6271  | -2.0344 |
| 53 | H | 5.0484 | -1.2550 | -1.1972 |

## TS2b

Energy (FREE) = -1096.277813 Eh

|    | Atom | X       | Y       | Z       |
|----|------|---------|---------|---------|
| 1  | O    | 3.1072  | -1.9950 | 0.6480  |
| 2  | C    | 3.0177  | -0.9716 | 0.0079  |
| 3  | C    | 1.6967  | -0.3872 | -0.5049 |
| 4  | C    | 1.5068  | 1.0842  | -0.1253 |
| 5  | C    | 0.3284  | 1.6879  | -0.8719 |
| 6  | O    | -0.1537 | 2.8620  | -0.4808 |
| 7  | C    | 0.3395  | 3.5790  | 0.6770  |
| 8  | C    | -0.4278 | 3.1903  | 1.9246  |
| 9  | O    | -0.1720 | 1.1383  | -1.8336 |
| 10 | N    | 0.5649  | -1.2073 | -0.0544 |
| 11 | C    | 0.3061  | -1.3426 | 1.2778  |
| 12 | C    | -0.7870 | -2.0344 | 1.7165  |
| 13 | C    | -1.7056 | -2.5672 | 0.7803  |
| 14 | C    | -1.3432 | -2.5182 | -0.5854 |
| 15 | C    | -0.2383 | -1.8099 | -0.9720 |
| 16 | O    | 4.0282  | -0.2154 | -0.3807 |
| 17 | C    | 5.3635  | -0.6508 | -0.0122 |
| 18 | C    | 6.3345  | 0.3760  | -0.5455 |
| 19 | H    | 1.7264  | -0.4590 | -1.5940 |
| 20 | H    | 2.4094  | 1.6363  | -0.4047 |
| 21 | H    | 1.3948  | 1.1945  | 0.9551  |
| 22 | H    | 0.1703  | 4.6256  | 0.4247  |
| 23 | H    | 1.4158  | 3.4303  | 0.7839  |
| 24 | H    | -1.4990 | 3.3516  | 1.7811  |
| 25 | H    | -0.0931 | 3.8123  | 2.7591  |
| 26 | H    | -0.2672 | 2.1437  | 2.1981  |
| 27 | H    | 1.0140  | -0.8917 | 1.9602  |
| 28 | H    | -0.9568 | -2.1281 | 2.7813  |
| 29 | H    | -1.9465 | -3.0010 | -1.3434 |
| 30 | H    | 0.0494  | -1.6988 | -2.0085 |
| 31 | H    | 5.5280  | -1.6394 | -0.4467 |
| 32 | H    | 5.4045  | -0.7313 | 1.0763  |
| 33 | H    | 6.2664  | 0.4515  | -1.6336 |
| 34 | H    | 7.3517  | 0.0732  | -0.2840 |
| 35 | H    | 6.1443  | 1.3591  | -0.1077 |
| 36 | C    | -3.3888 | -0.9894 | 0.9126  |
| 37 | C    | -4.3627 | -1.3475 | -0.1729 |
| 38 | H    | -4.3480 | -2.4244 | -0.3831 |
| 39 | H    | -5.3766 | -1.1454 | 0.2075  |
| 40 | C    | -4.1122 | -0.5264 | -1.4390 |
| 41 | H    | -3.1135 | -0.7625 | -1.8242 |
| 42 | H    | -4.8205 | -0.8147 | -2.2209 |
| 43 | C    | -4.2117 | 0.9863  | -1.1628 |
| 44 | H    | -3.6666 | 1.5237  | -1.9454 |
| 45 | H    | -5.2573 | 1.3033  | -1.2361 |
| 46 | C    | -3.6599 | 1.3778  | 0.2268  |
| 47 | H    | -3.1523 | 2.3457  | 0.1770  |
| 48 | H    | -4.4808 | 1.4897  | 0.9437  |
| 49 | C    | -2.6789 | 0.3208  | 0.7694  |

|    |   |         |         |        |
|----|---|---------|---------|--------|
| 50 | H | -1.8581 | 0.2270  | 0.0435 |
| 51 | H | -2.2412 | 0.6370  | 1.7188 |
| 52 | H | -3.6315 | -1.3256 | 1.9184 |
| 53 | H | -2.4698 | -3.2608 | 1.1089 |

## TS3a

Energy (FREE) = -1672.484546 Eh

|    | Atom | X       | Y       | Z       |
|----|------|---------|---------|---------|
| 1  | O    | 4.7601  | -1.8111 | -0.3035 |
| 2  | C    | 4.6131  | -0.6112 | -0.3754 |
| 3  | C    | 3.2920  | 0.0759  | -0.7381 |
| 4  | C    | 2.9524  | 1.2576  | 0.1771  |
| 5  | C    | 1.8470  | 2.1070  | -0.4304 |
| 6  | O    | 1.1738  | 2.9531  | 0.3475  |
| 7  | C    | 1.3944  | 3.0633  | 1.7718  |
| 8  | C    | 0.5141  | 2.0958  | 2.5370  |
| 9  | O    | 1.5879  | 2.0745  | -1.6162 |
| 10 | N    | 2.1973  | -0.8846 | -0.7834 |
| 11 | C    | 1.8425  | -1.5977 | 0.3450  |
| 12 | C    | 0.7222  | -2.3583 | 0.3653  |
| 13 | C    | -0.2211 | -2.3711 | -0.7475 |
| 14 | C    | 0.3651  | -1.8374 | -1.9684 |
| 15 | C    | 1.4946  | -1.0844 | -1.9482 |
| 16 | O    | 5.5706  | 0.2857  | -0.2013 |
| 17 | C    | 6.9003  | -0.2134 | 0.0912  |
| 18 | C    | 7.8062  | 0.9849  | 0.2517  |
| 19 | H    | 3.4229  | 0.4625  | -1.7522 |
| 20 | H    | 3.8363  | 1.8933  | 0.2896  |
| 21 | H    | 2.6912  | 0.9002  | 1.1748  |
| 22 | H    | 1.1267  | 4.0953  | 1.9988  |
| 23 | H    | 2.4539  | 2.9348  | 2.0024  |
| 24 | H    | -0.5387 | 2.2789  | 2.3070  |
| 25 | H    | 0.6605  | 2.2385  | 3.6107  |
| 26 | H    | 0.7493  | 1.0546  | 2.2983  |
| 27 | H    | 2.5196  | -1.5384 | 1.1869  |
| 28 | H    | 0.5189  | -2.9358 | 1.2607  |
| 29 | H    | -0.8942 | -1.1904 | -0.4584 |
| 30 | H    | -0.1481 | -1.9362 | -2.9164 |
| 31 | H    | 1.8877  | -0.5970 | -2.8303 |
| 32 | H    | 7.2112  | -0.8572 | -0.7350 |
| 33 | H    | 6.8450  | -0.8127 | 1.0030  |
| 34 | H    | 7.8387  | 1.5772  | -0.6663 |
| 35 | H    | 8.8190  | 0.6394  | 0.4748  |
| 36 | H    | 7.4706  | 1.6219  | 1.0740  |
| 37 | H    | -2.5302 | -4.7216 | 0.3817  |
| 38 | H    | -4.0100 | -2.9073 | 1.1144  |
| 39 | H    | -1.6162 | -3.5557 | 1.3175  |
| 40 | C    | -2.1416 | -3.6955 | 0.3659  |
| 41 | C    | -3.3234 | -2.7252 | 0.2804  |
| 42 | H    | -4.5576 | -3.7832 | -1.1412 |
| 43 | C    | -4.0590 | -2.8076 | -1.0580 |
| 44 | C    | -1.1680 | -3.5890 | -0.8254 |
| 45 | H    | -2.9654 | -1.6982 | 0.4048  |
| 46 | H    | -4.8427 | -2.0435 | -1.1014 |
| 47 | H    | -0.5071 | -4.4659 | -0.7818 |
| 48 | H    | -2.4244 | -4.6880 | -2.1600 |
| 49 | C    | -1.9680 | -3.6900 | -2.1342 |

|    |   |         |         |         |
|----|---|---------|---------|---------|
| 50 | C | -3.0830 | -2.6454 | -2.2266 |
| 51 | H | -3.6107 | -2.7465 | -3.1808 |
| 52 | H | -1.3082 | -3.6441 | -3.0056 |
| 53 | H | -2.6548 | -1.6334 | -2.2078 |
| 54 | H | -3.4779 | -0.9901 | 5.0591  |
| 55 | H | -1.3544 | -1.8178 | 4.0135  |
| 56 | C | -3.1526 | -0.6488 | 4.0847  |
| 57 | C | -1.9858 | -1.1004 | 3.5015  |
| 58 | C | -1.5994 | -0.6234 | 2.2560  |
| 59 | C | -3.9723 | 0.3300  | 3.3578  |
| 60 | H | -0.6706 | -0.9502 | 1.8077  |
| 61 | H | -4.9032 | 0.6571  | 3.8087  |
| 62 | C | -3.6120 | 0.8201  | 2.1271  |
| 63 | C | -2.4276 | 0.3620  | 1.5030  |
| 64 | H | -2.6269 | 3.2090  | 1.2836  |
| 65 | C | -2.0395 | 0.7453  | 0.1816  |
| 66 | H | -4.2719 | 1.5070  | 1.6125  |
| 67 | O | -1.1965 | 0.0407  | -0.4993 |
| 68 | C | -2.7897 | 3.1544  | 0.2120  |
| 69 | C | -2.5410 | 1.9623  | -0.4849 |
| 70 | H | -3.3900 | 5.2104  | 0.0799  |
| 71 | C | -3.2112 | 4.2919  | -0.4692 |
| 72 | C | -2.7030 | 1.9412  | -1.8791 |
| 73 | C | -3.3911 | 4.2546  | -1.8514 |
| 74 | H | -2.4939 | 1.0253  | -2.4216 |
| 75 | C | -3.1348 | 3.0763  | -2.5543 |
| 76 | H | -3.7229 | 5.1423  | -2.3802 |
| 77 | H | -3.2700 | 3.0439  | -3.6305 |

## TS3b

Energy (FREE) = -1672.490300 Eh

|    | Atom | X       | Y       | Z       |
|----|------|---------|---------|---------|
| 1  | O    | 2.1386  | -0.8289 | 0.3732  |
| 2  | C    | 2.7292  | 0.0591  | -0.2009 |
| 3  | C    | 2.0885  | 1.3709  | -0.6701 |
| 4  | C    | 2.6207  | 2.5612  | 0.1370  |
| 5  | C    | 2.2022  | 3.8767  | -0.4987 |
| 6  | O    | 2.3662  | 5.0056  | 0.1868  |
| 7  | C    | 2.8367  | 5.0422  | 1.5551  |
| 8  | C    | 1.6782  | 4.9671  | 2.5296  |
| 9  | O    | 1.7579  | 3.9363  | -1.6273 |
| 10 | N    | 0.6362  | 1.2615  | -0.6367 |
| 11 | C    | -0.0328 | 1.0890  | 0.5568  |
| 12 | C    | -1.3583 | 0.8092  | 0.5791  |
| 13 | C    | -2.0976 | 0.5463  | -0.6466 |
| 14 | C    | -1.4096 | 1.0344  | -1.8357 |
| 15 | C    | -0.0830 | 1.3131  | -1.8129 |
| 16 | O    | 4.0157  | 0.0394  | -0.5088 |
| 17 | C    | 4.7654  | -1.1382 | -0.1126 |
| 18 | C    | 6.1781  | -0.9683 | -0.6189 |
| 19 | H    | 2.3769  | 1.5153  | -1.7125 |
| 20 | H    | 3.7151  | 2.5203  | 0.1408  |
| 21 | H    | 2.3042  | 2.5033  | 1.1804  |
| 22 | H    | 3.3474  | 6.0024  | 1.6293  |
| 23 | H    | 3.5767  | 4.2573  | 1.7230  |
| 24 | H    | 0.9702  | 5.7783  | 2.3443  |
| 25 | H    | 2.0601  | 5.0660  | 3.5493  |
| 26 | H    | 1.1421  | 4.0165  | 2.4584  |
| 27 | H    | 0.5538  | 1.1699  | 1.4613  |
| 28 | H    | -1.8440 | 0.6817  | 1.5412  |
| 29 | H    | -1.9284 | 1.1003  | -2.7855 |
| 30 | H    | 0.4732  | 1.6045  | -2.6938 |
| 31 | H    | 4.2751  | -2.0130 | -0.5466 |
| 32 | H    | 4.7234  | -1.2162 | 0.9765  |
| 33 | H    | 6.1953  | -0.8825 | -1.7083 |
| 34 | H    | 6.7666  | -1.8439 | -0.3328 |
| 35 | H    | 6.6466  | -0.0814 | -0.1848 |
| 36 | C    | -3.6212 | 0.6026  | -0.5776 |
| 37 | C    | -4.3036 | -0.2520 | -1.6693 |
| 38 | H    | -3.7041 | -0.2489 | -2.5869 |
| 39 | H    | -4.3369 | -1.2942 | -1.3307 |
| 40 | C    | -5.7275 | 0.2383  | -1.9916 |
| 41 | H    | -5.6893 | 1.0085  | -2.7724 |
| 42 | H    | -6.3209 | -0.5866 | -2.3983 |
| 43 | C    | -6.3934 | 0.8273  | -0.7471 |
| 44 | H    | -7.4450 | 1.0596  | -0.9433 |
| 45 | H    | -6.3859 | 0.0714  | 0.0488  |
| 46 | C    | -5.6486 | 2.0948  | -0.2784 |
| 47 | H    | -6.0926 | 2.9805  | -0.7462 |
| 48 | H    | -5.7761 | 2.2142  | 0.8033  |
| 49 | C    | -4.1465 | 2.0459  | -0.6197 |

|    |   |         |         |         |
|----|---|---------|---------|---------|
| 50 | H | -3.9691 | 2.4539  | -1.6234 |
| 51 | H | -3.5782 | 2.6735  | 0.0754  |
| 52 | H | -3.8948 | 0.1853  | 0.4009  |
| 53 | H | -1.7925 | -0.7462 | -0.8206 |
| 54 | H | 2.7609  | -3.6219 | -3.0114 |
| 55 | C | 2.3213  | -3.7311 | -2.0262 |
| 56 | H | 0.6220  | -2.4890 | -2.4647 |
| 57 | H | 3.8878  | -5.0300 | -1.2741 |
| 58 | C | 1.1397  | -3.0945 | -1.7322 |
| 59 | C | 2.9546  | -4.5224 | -1.0632 |
| 60 | O | -1.2215 | -1.8750 | -1.1092 |
| 61 | C | 0.5344  | -3.1976 | -0.3749 |
| 62 | C | 2.3250  | -4.6956 | 0.2477  |
| 63 | C | -0.6426 | -2.4448 | -0.0993 |
| 64 | C | 1.1644  | -4.0689 | 0.5737  |
| 65 | H | 2.8040  | -5.3524 | 0.9659  |
| 66 | C | -1.2202 | -2.2696 | 1.2465  |
| 67 | H | 0.7108  | -4.2312 | 1.5433  |
| 68 | H | -3.2380 | -2.4719 | 0.5188  |
| 69 | C | -2.6158 | -2.2643 | 1.3840  |
| 70 | H | 0.6578  | -1.9354 | 2.2555  |
| 71 | C | -0.4203 | -1.9919 | 2.3643  |
| 72 | C | -3.2010 | -1.9937 | 2.6157  |
| 73 | C | -1.0095 | -1.7166 | 3.5937  |
| 74 | H | -4.2819 | -1.9946 | 2.7108  |
| 75 | C | -2.3988 | -1.7170 | 3.7232  |
| 76 | H | -0.3835 | -1.4843 | 4.4490  |
| 77 | H | -2.8548 | -1.4974 | 4.6831  |

## 9 NMR DATA

$^1\text{H}$  NMR (400 MHz,  $\text{CDCl}_3$ ) – **4a**

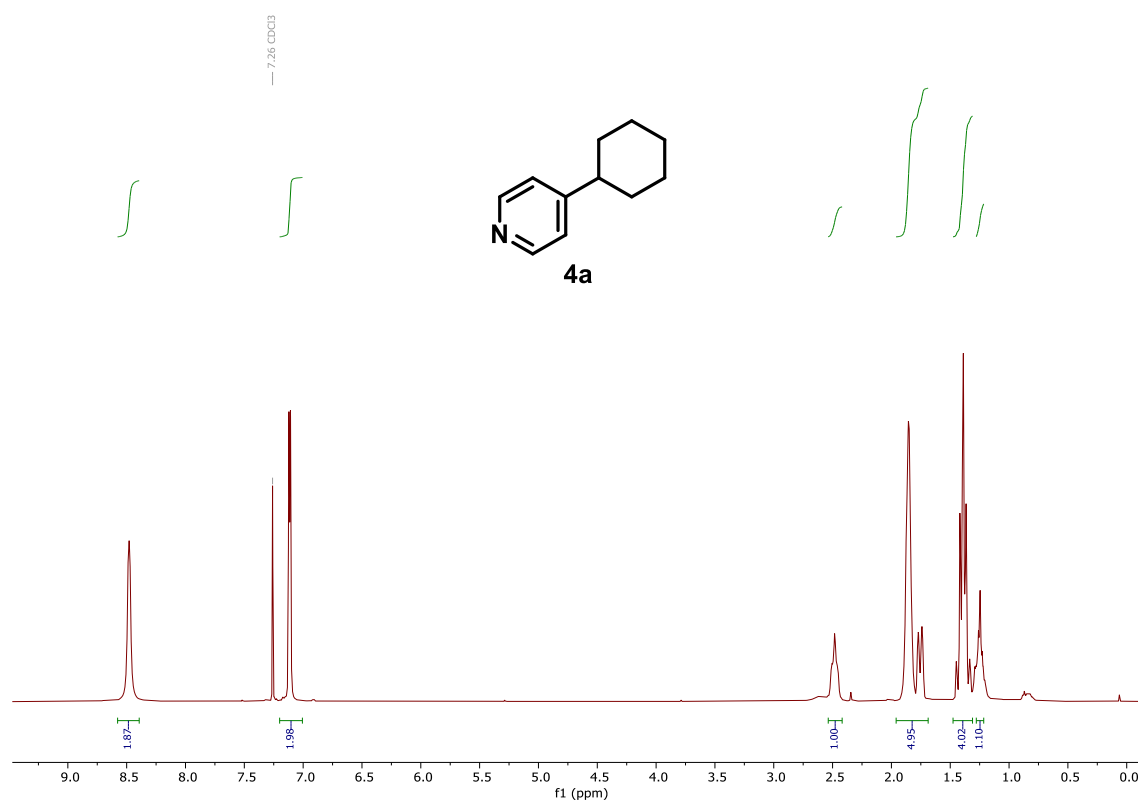

$^{13}\text{C}$  NMR (101 MHz,  $\text{CDCl}_3$ ) – **4a**

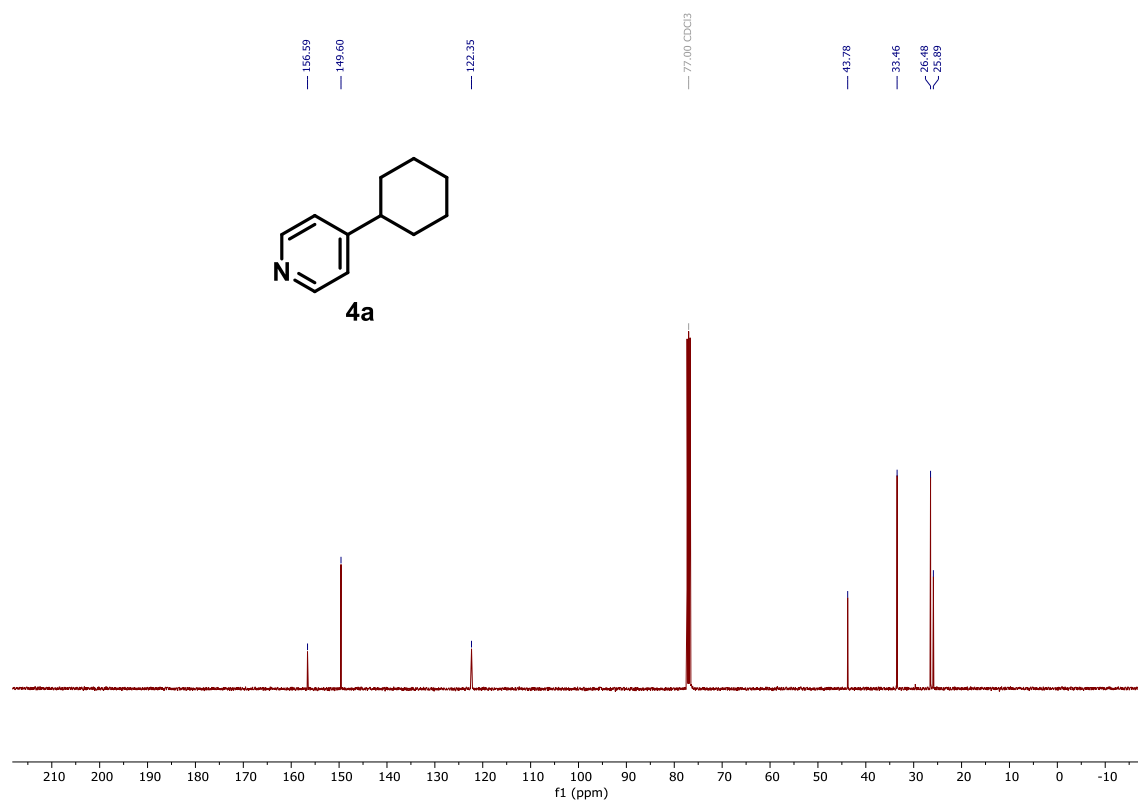

$^1\text{H}$  NMR (400 MHz,  $\text{CDCl}_3$ ) – **4b**

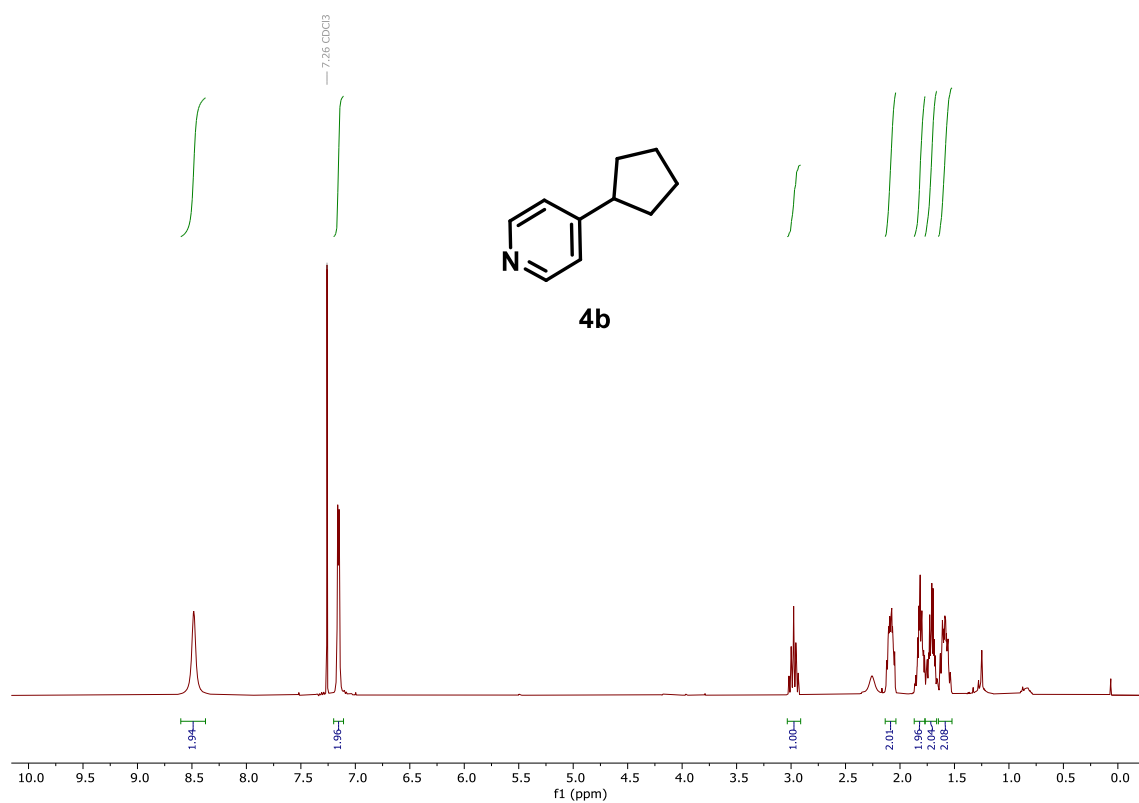

<sup>13</sup>C NMR (101 MHz, CDCl<sub>3</sub>) – **4b**

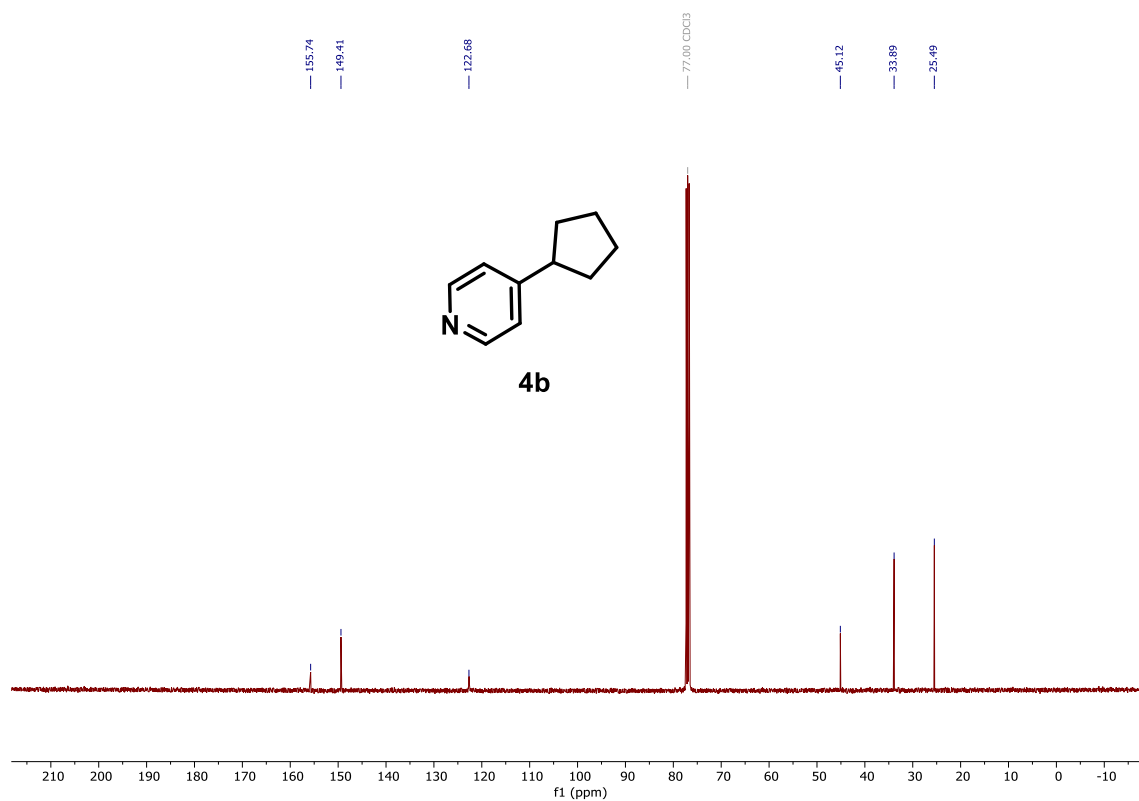

<sup>1</sup>H NMR (400 MHz, CDCl<sub>3</sub>) – **4c**

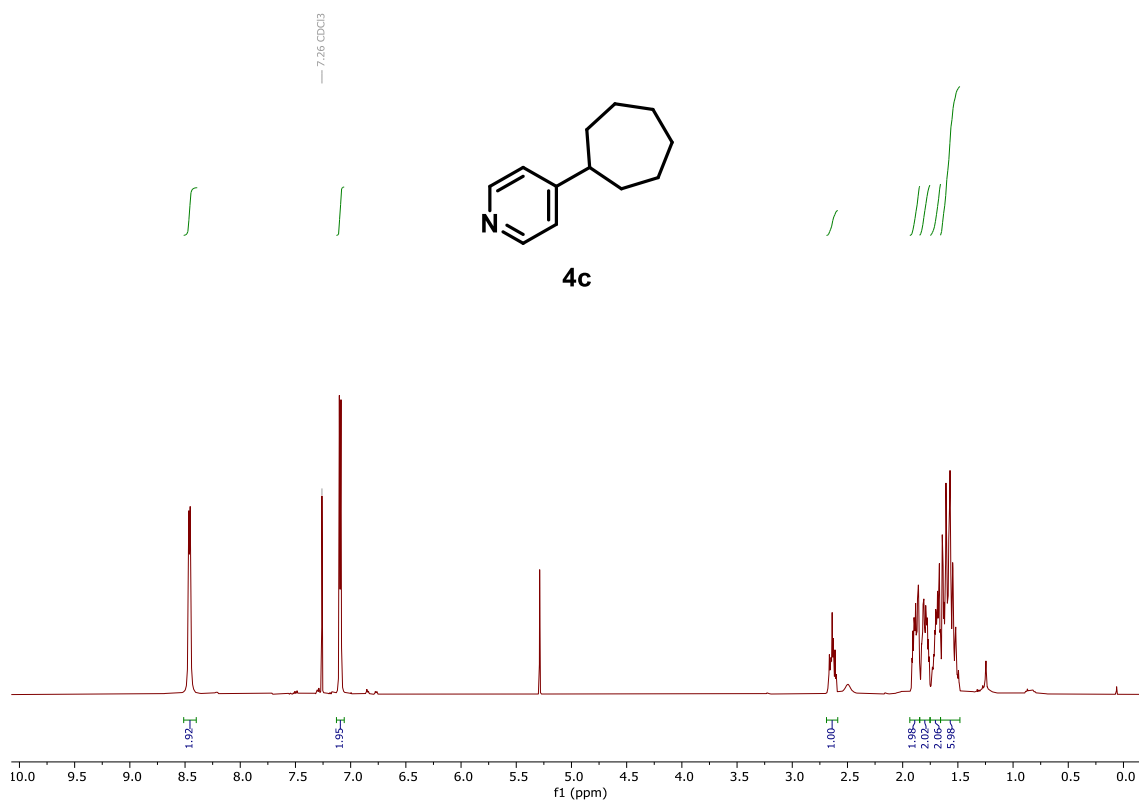

<sup>13</sup>C NMR (101 MHz, CDCl<sub>3</sub>) – **4c**

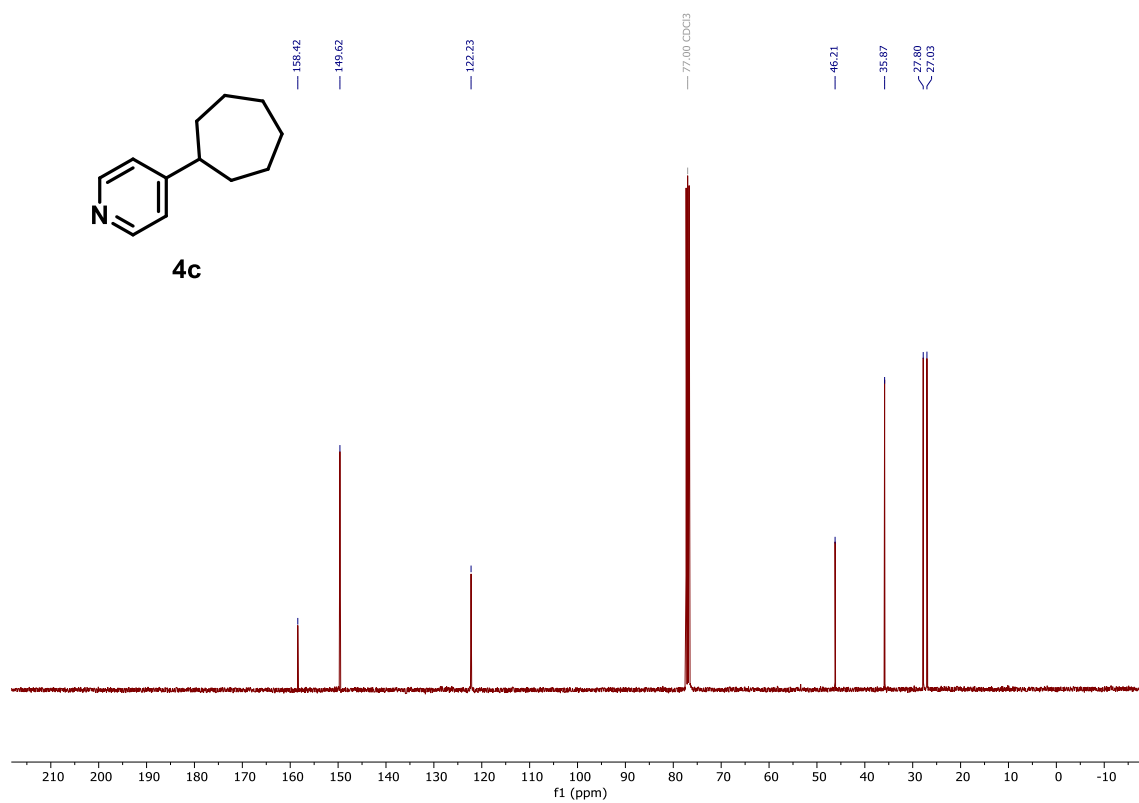

<sup>1</sup>H NMR (400 MHz, CDCl<sub>3</sub>) – **4d**

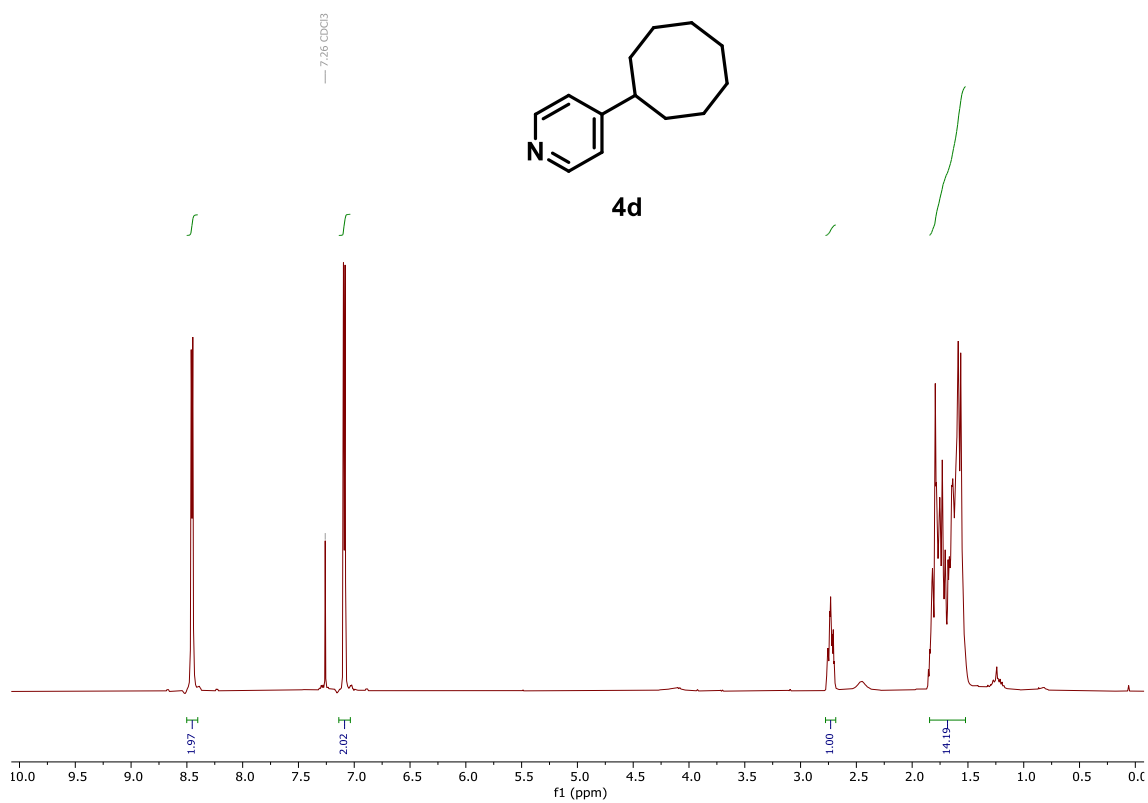

<sup>13</sup>C NMR (101 MHz, CDCl<sub>3</sub>) – **4d**

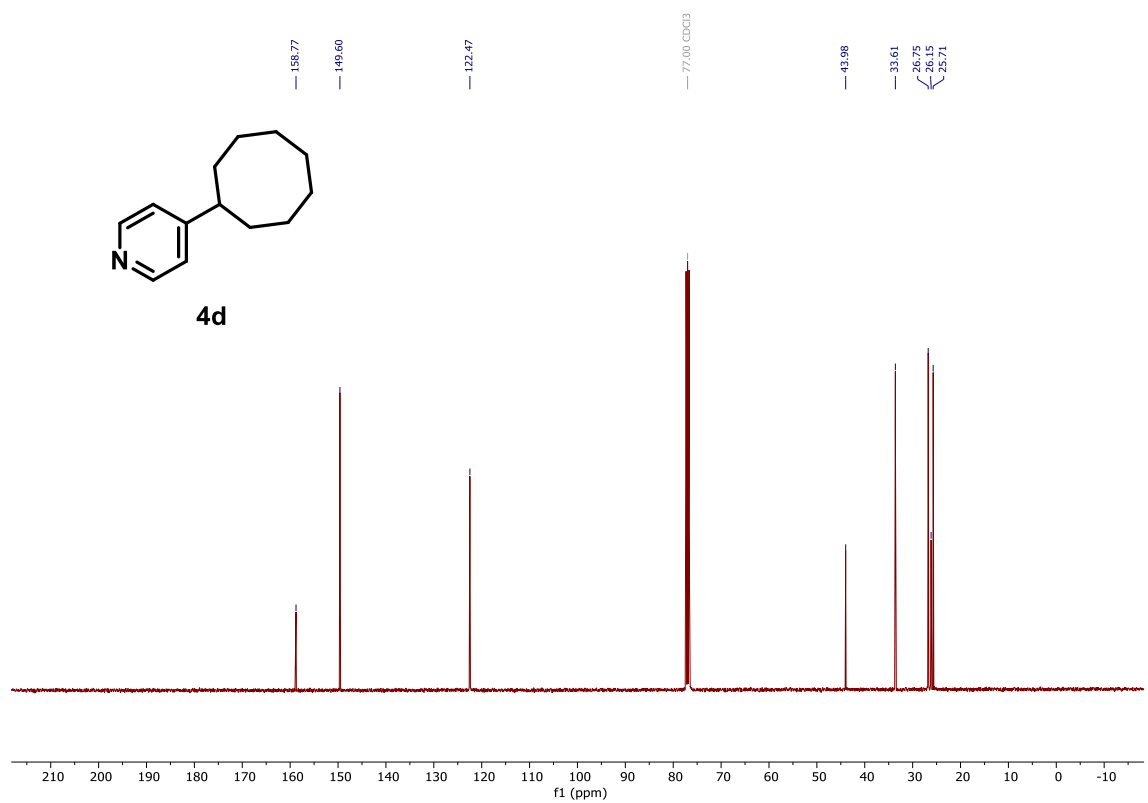

<sup>1</sup>H NMR (400 MHz, CDCl<sub>3</sub>) – 4e

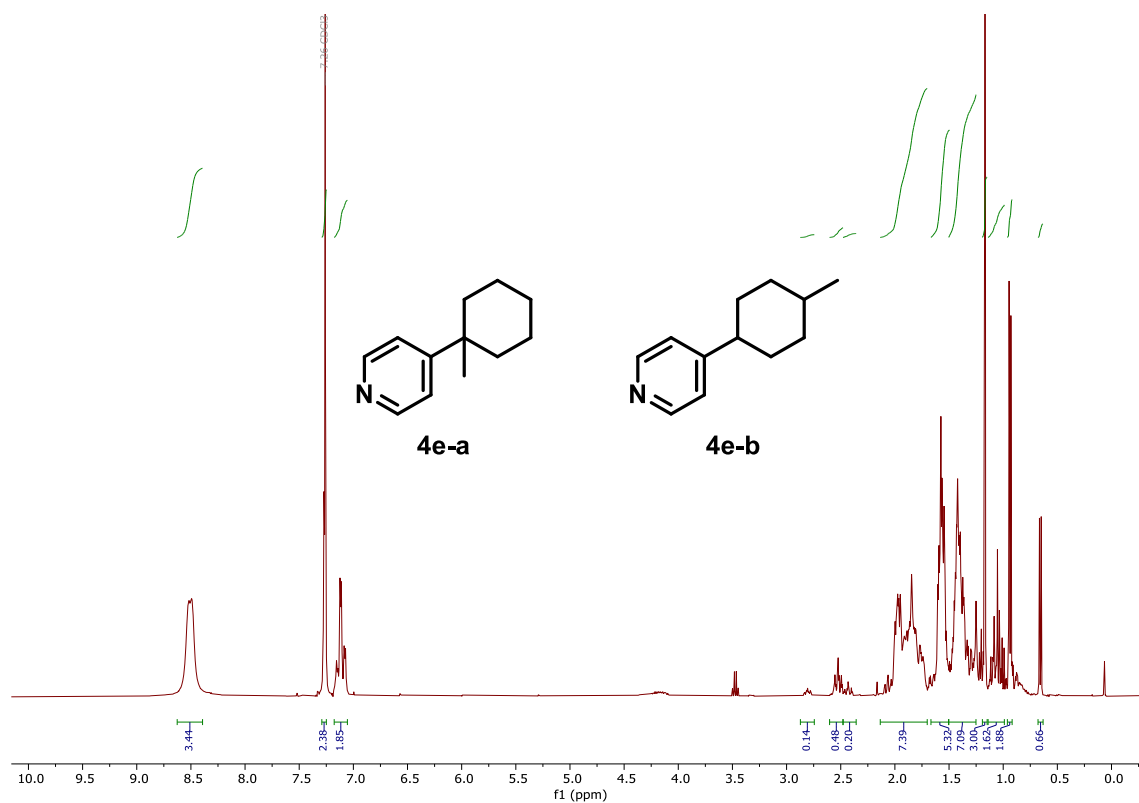

<sup>13</sup>C NMR (101 MHz, CDCl<sub>3</sub>) – 4e

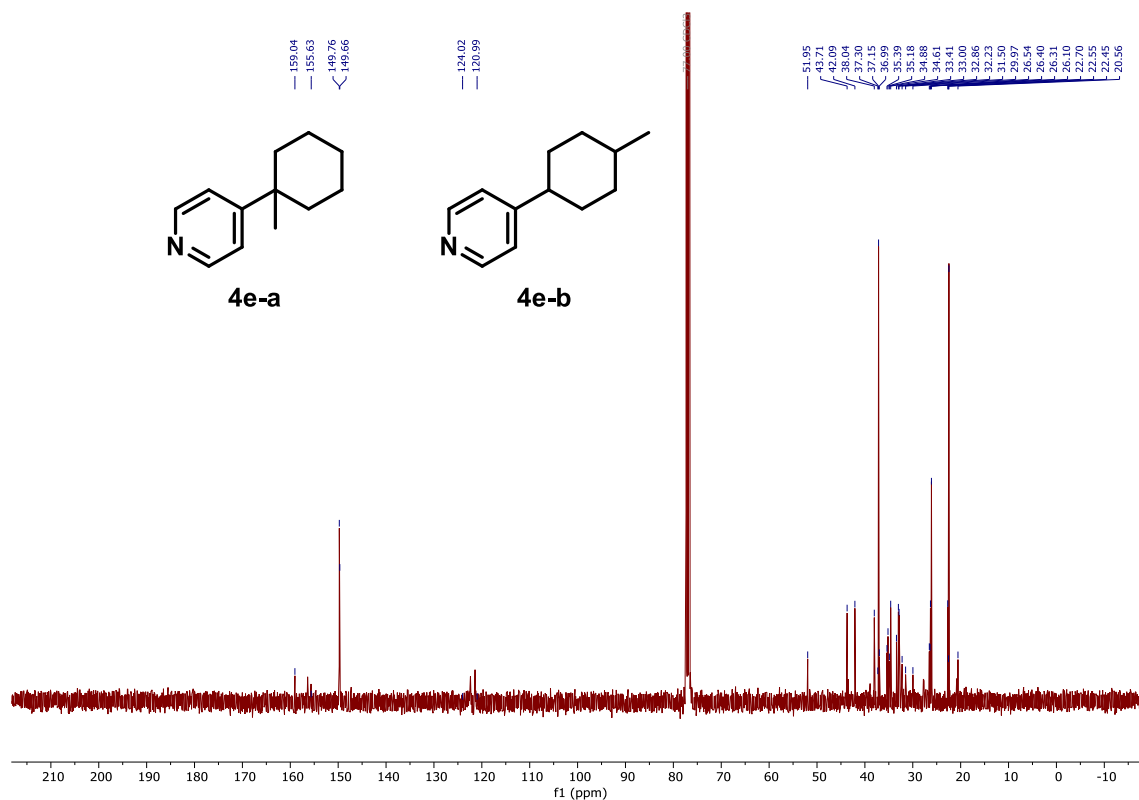

<sup>1</sup>H NMR (400 MHz, CDCl<sub>3</sub>) – 4f

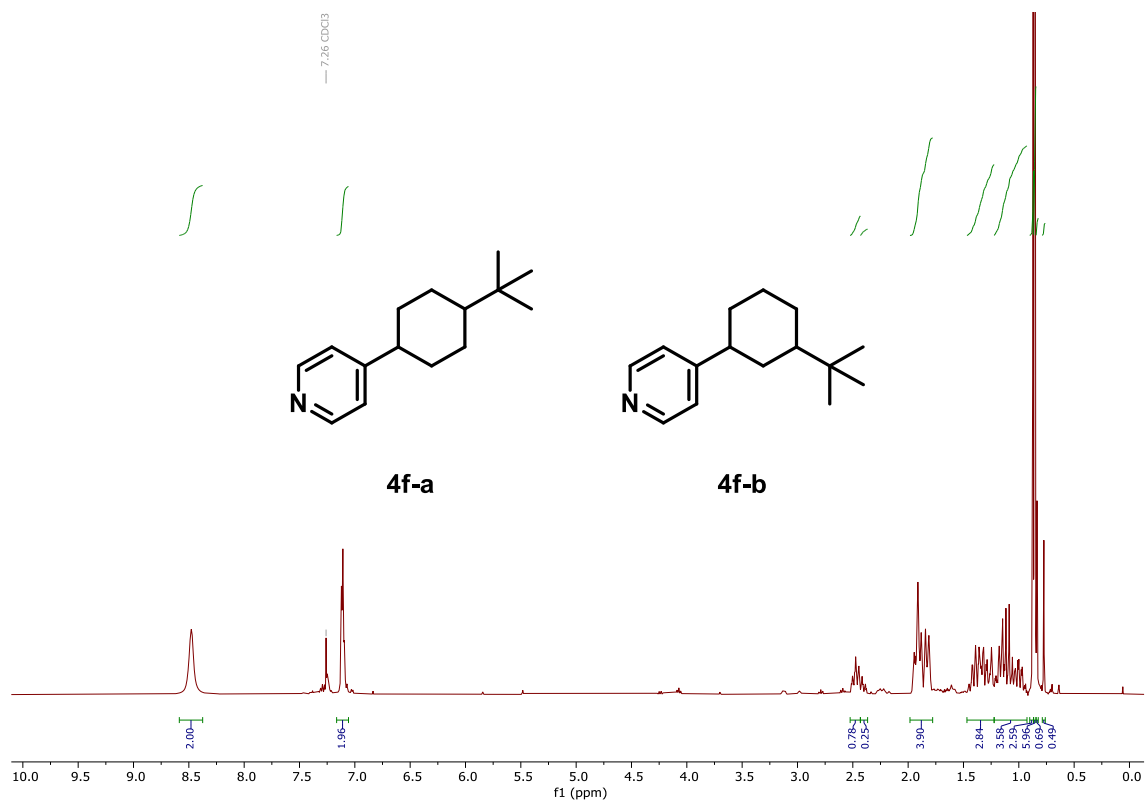

<sup>13</sup>C NMR (101 MHz, CDCl<sub>3</sub>) – 4f

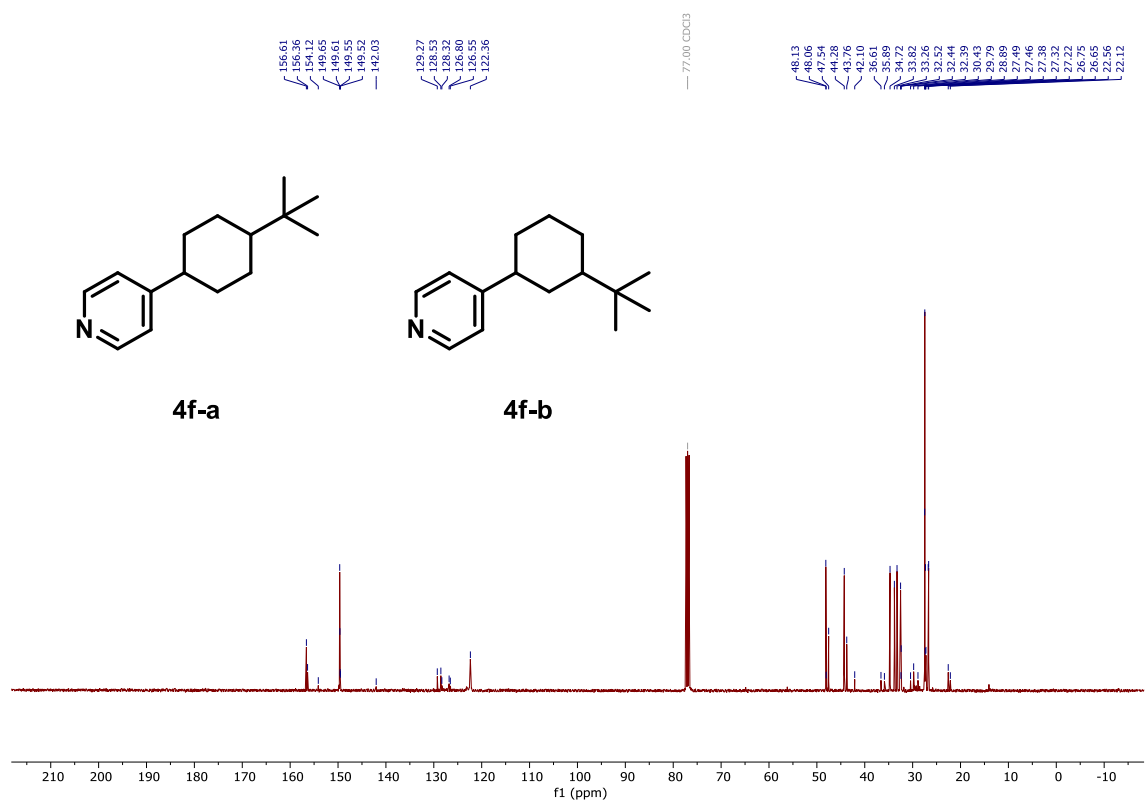

<sup>1</sup>H NMR (400 MHz, CDCl<sub>3</sub>) – **4g**

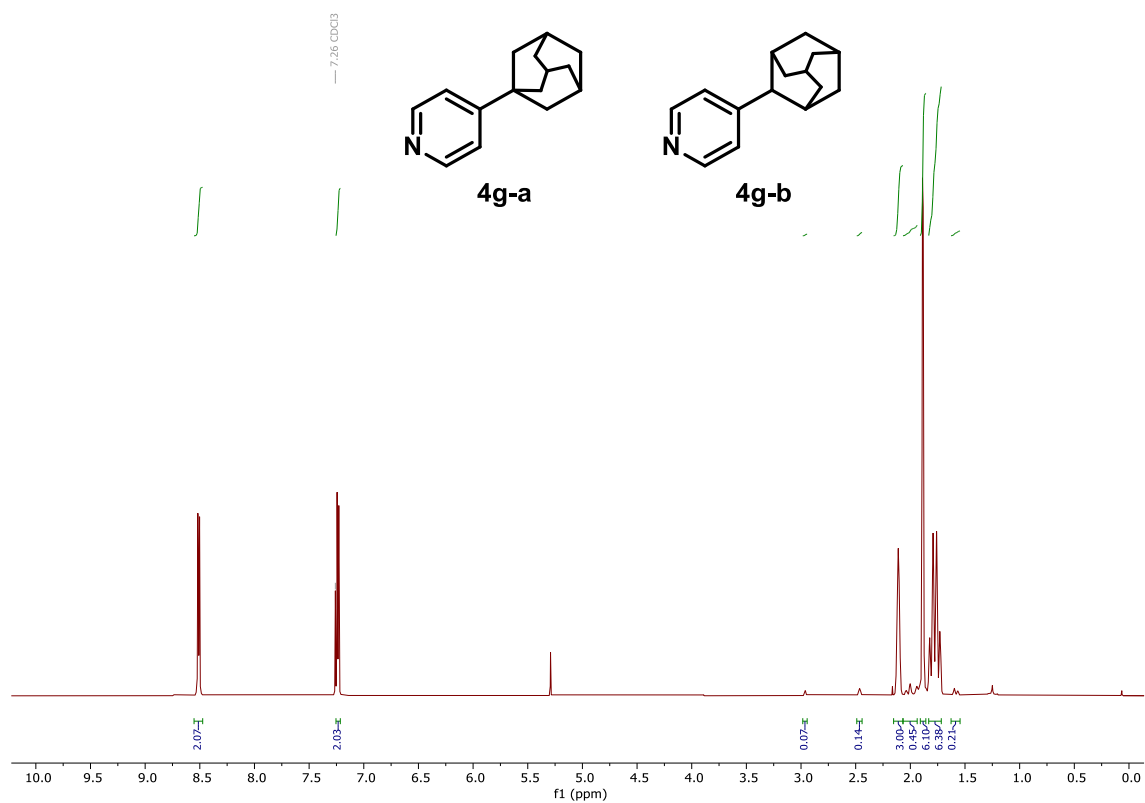

<sup>13</sup>C NMR (101 MHz, CDCl<sub>3</sub>) – **4g**

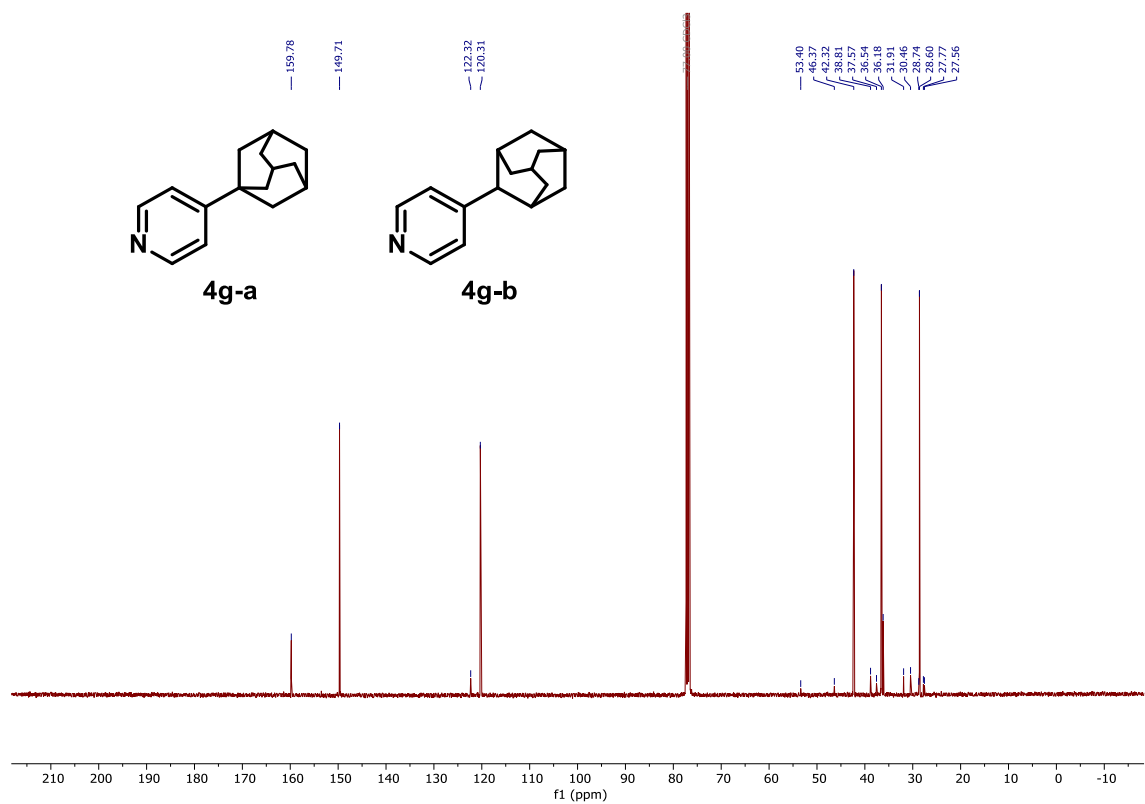

<sup>1</sup>H NMR (400 MHz, CDCl<sub>3</sub>) – 4h

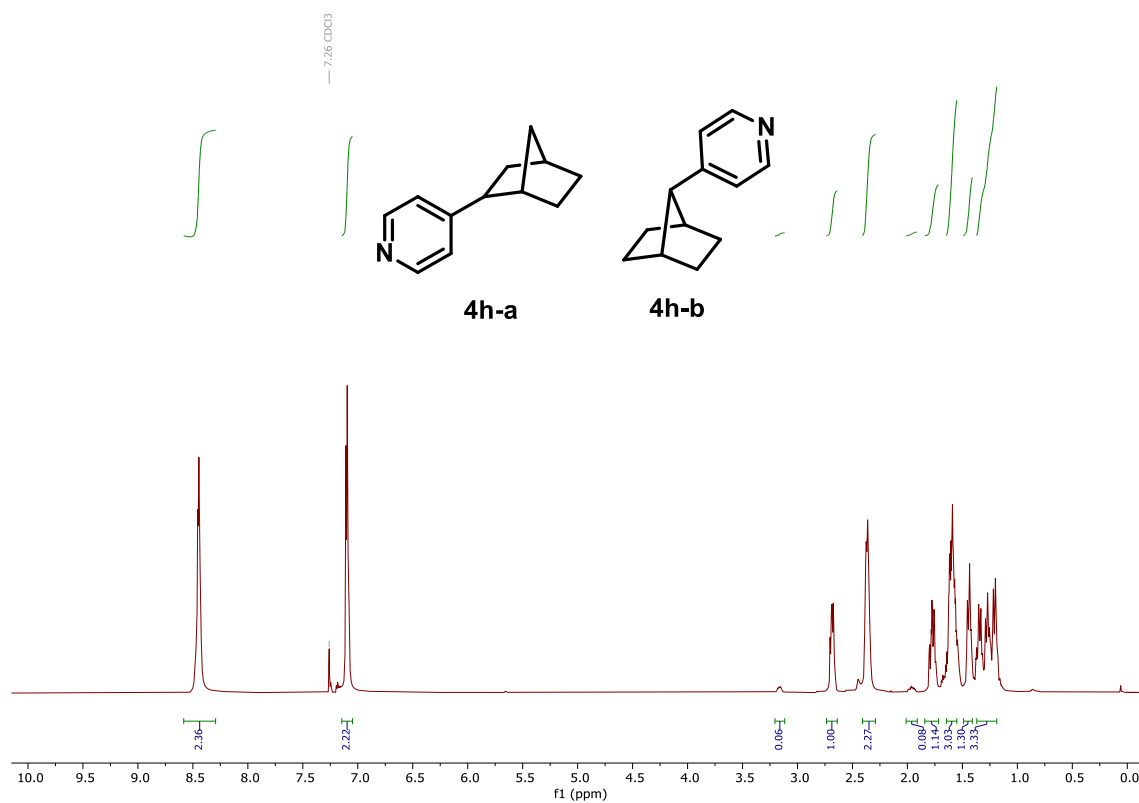

<sup>13</sup>C NMR (101 MHz, CDCl<sub>3</sub>) – 4h

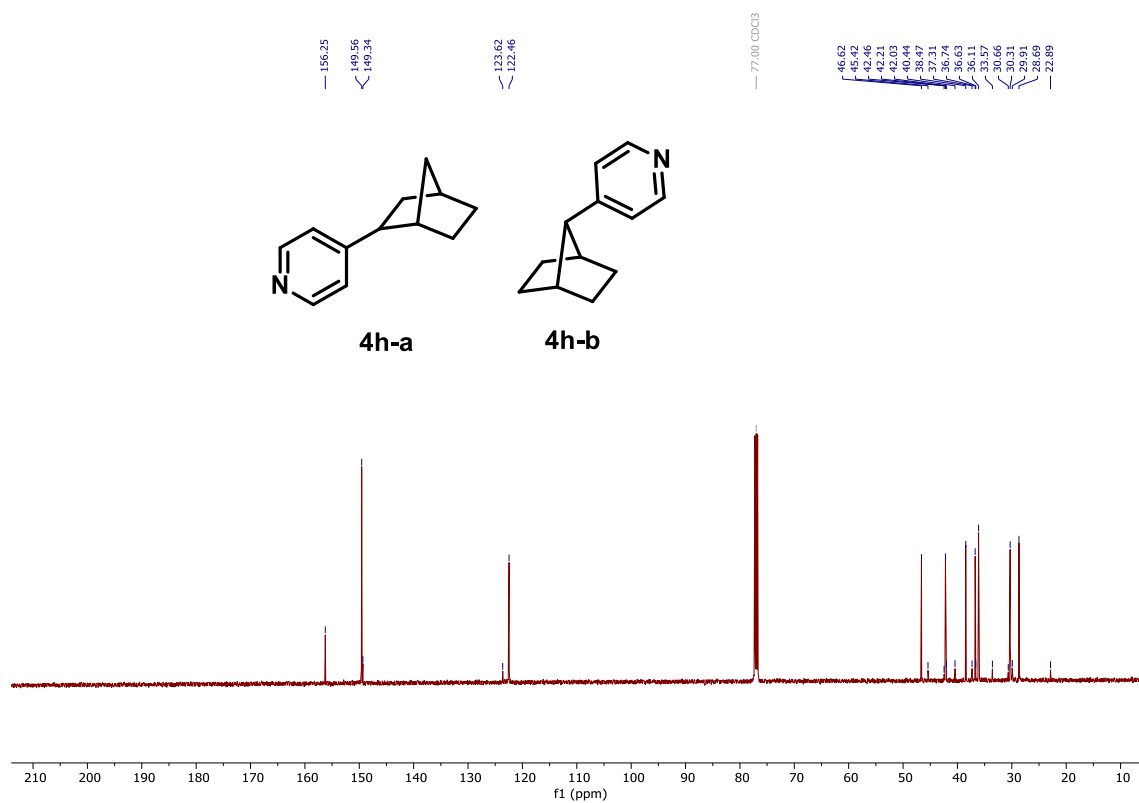

<sup>1</sup>H NMR (400 MHz, CDCl<sub>3</sub>) – 4i

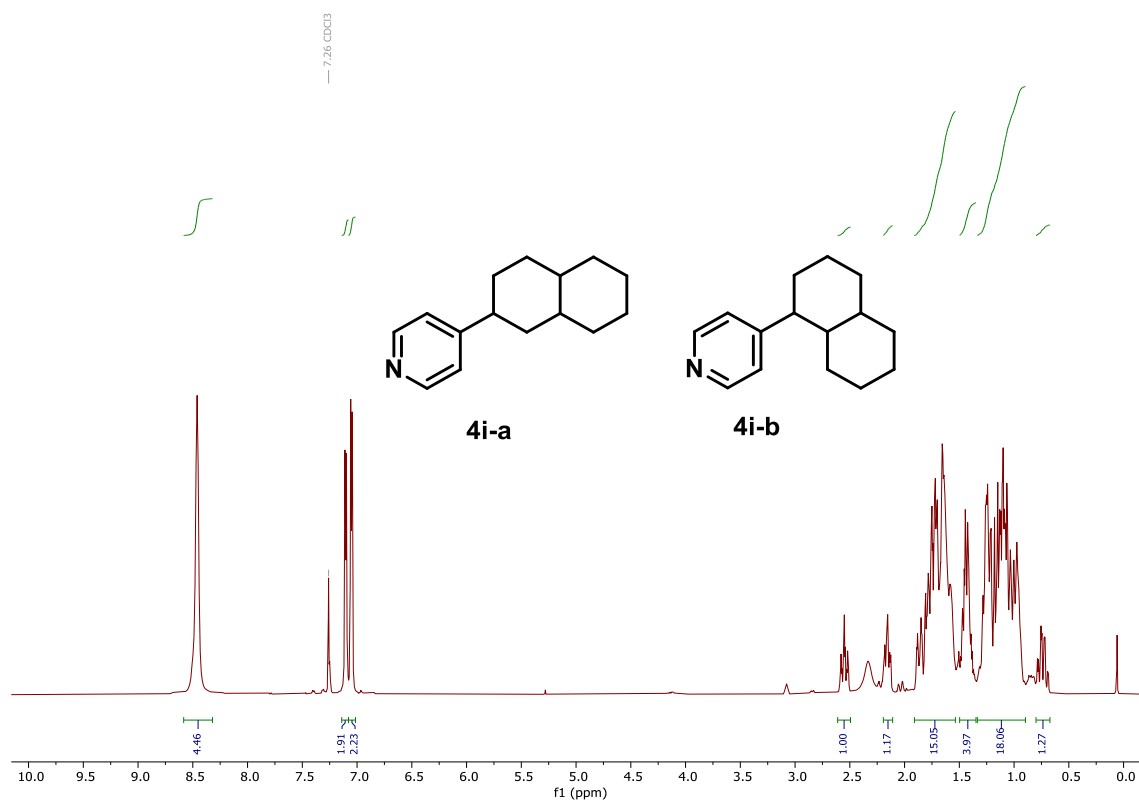

<sup>13</sup>C NMR (101 MHz, CDCl<sub>3</sub>) – 4i

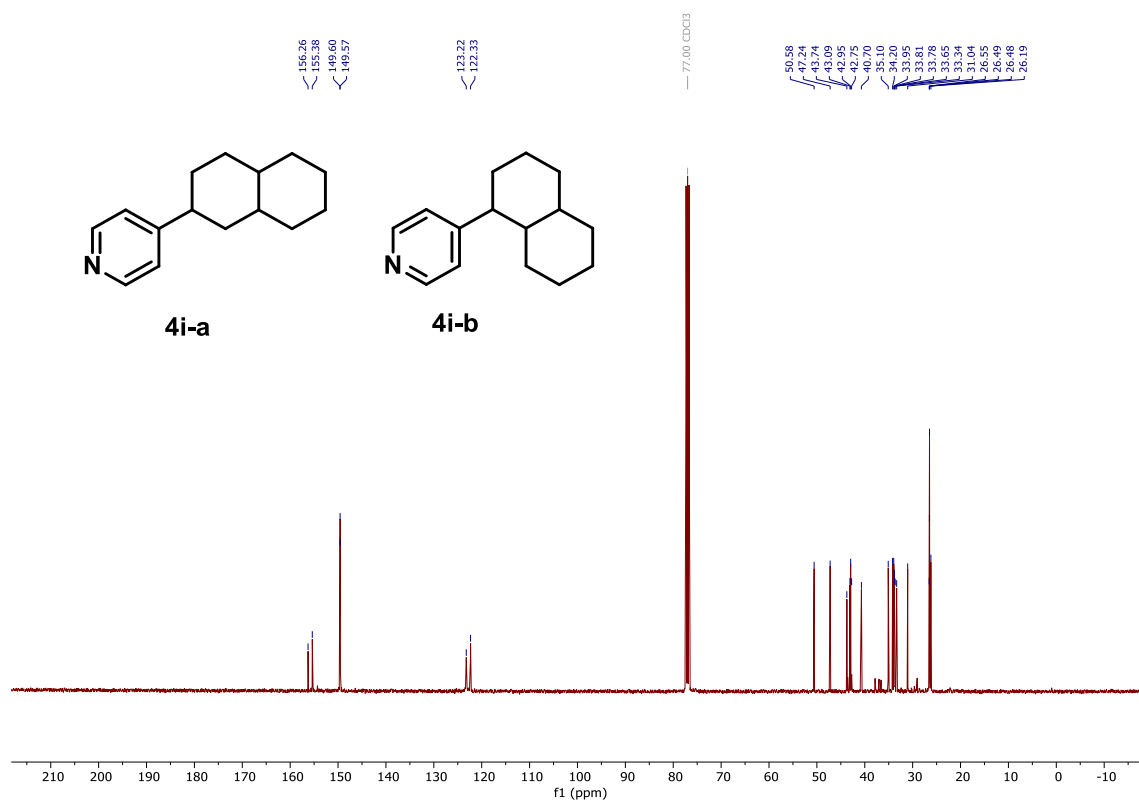

<sup>1</sup>H NMR (400 MHz, CDCl<sub>3</sub>) – **4j**

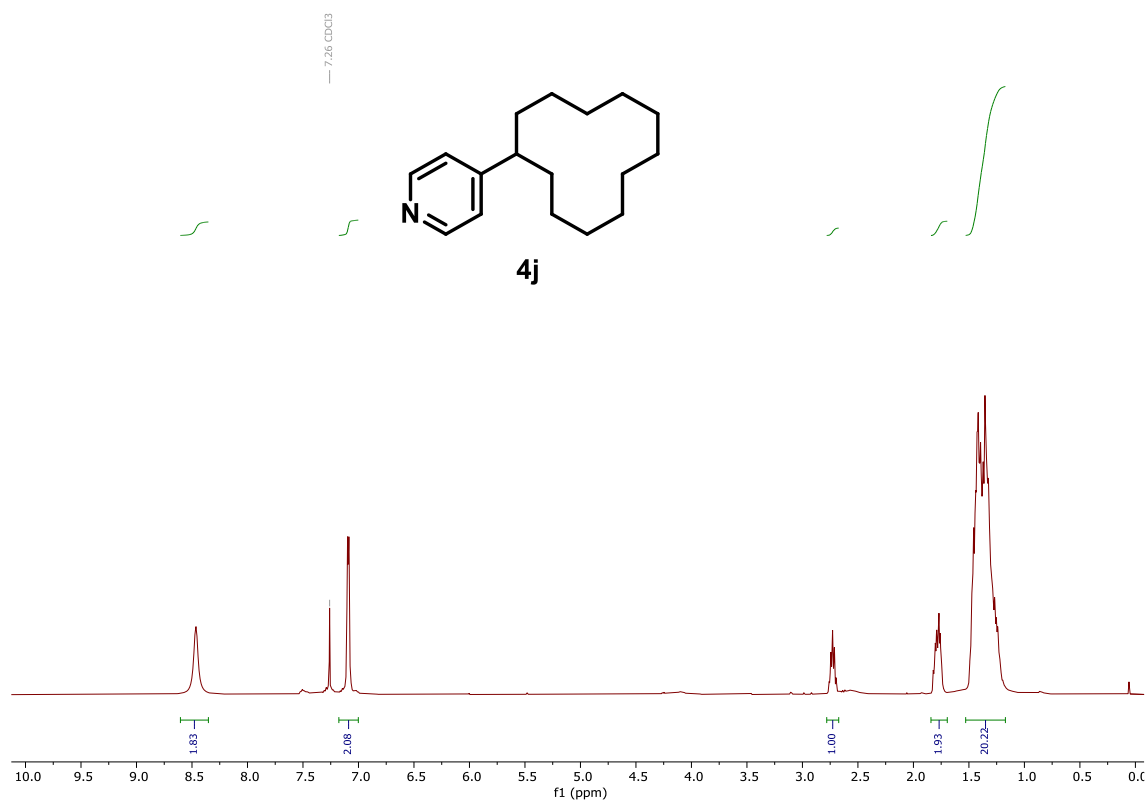

<sup>13</sup>C NMR (101 MHz, CDCl<sub>3</sub>) – **4j**

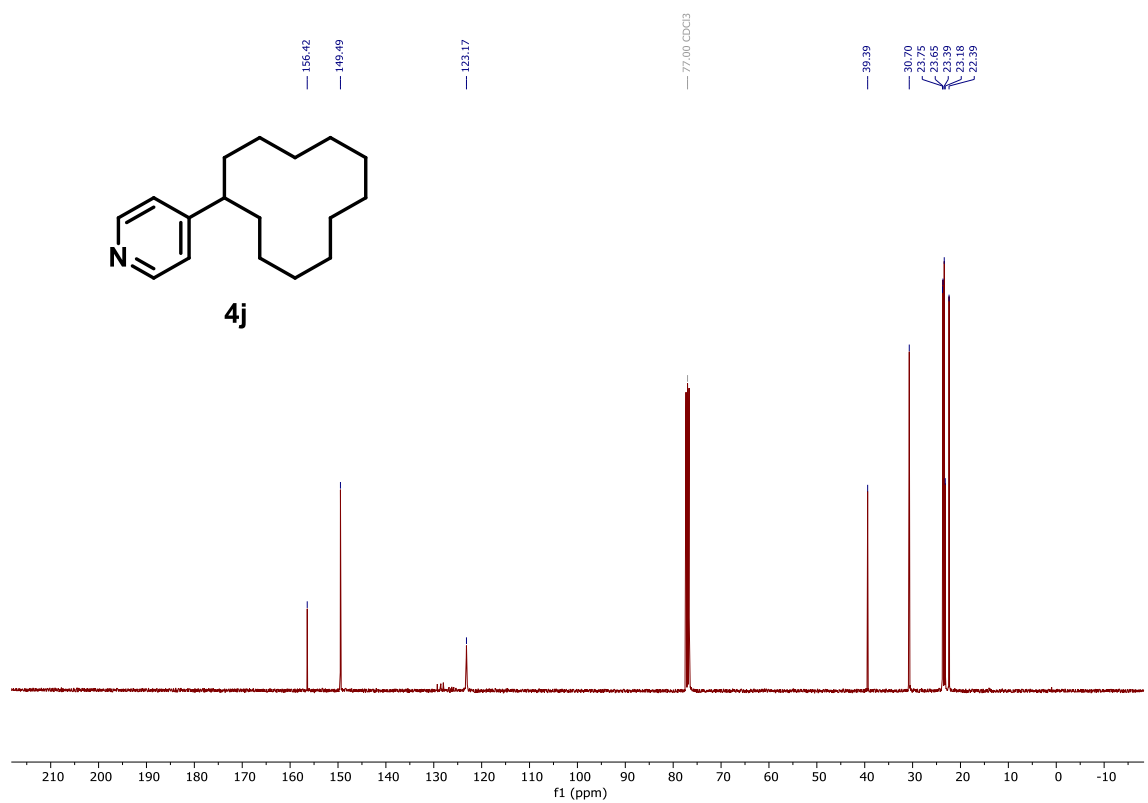

<sup>1</sup>H NMR (400 MHz, CDCl<sub>3</sub>) – 4k

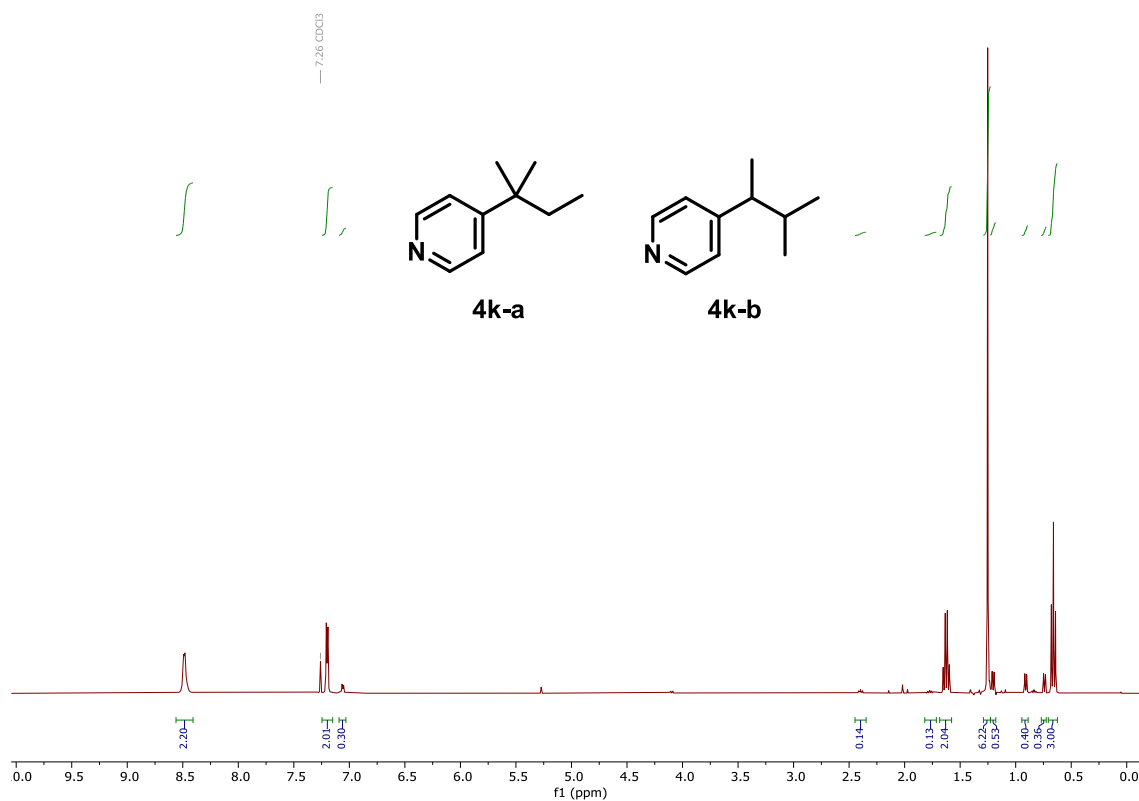

<sup>13</sup>C NMR (101 MHz, CDCl<sub>3</sub>) – 4k

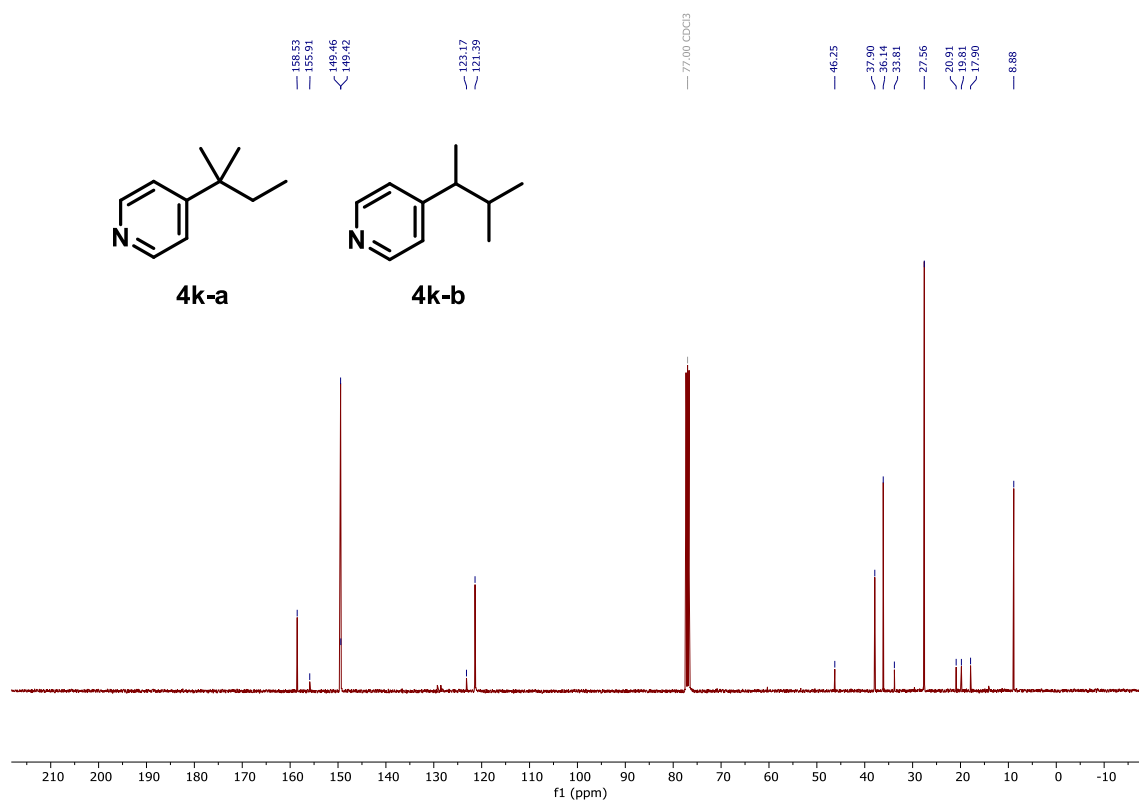

<sup>1</sup>H NMR (400 MHz, CDCl<sub>3</sub>) – 4I

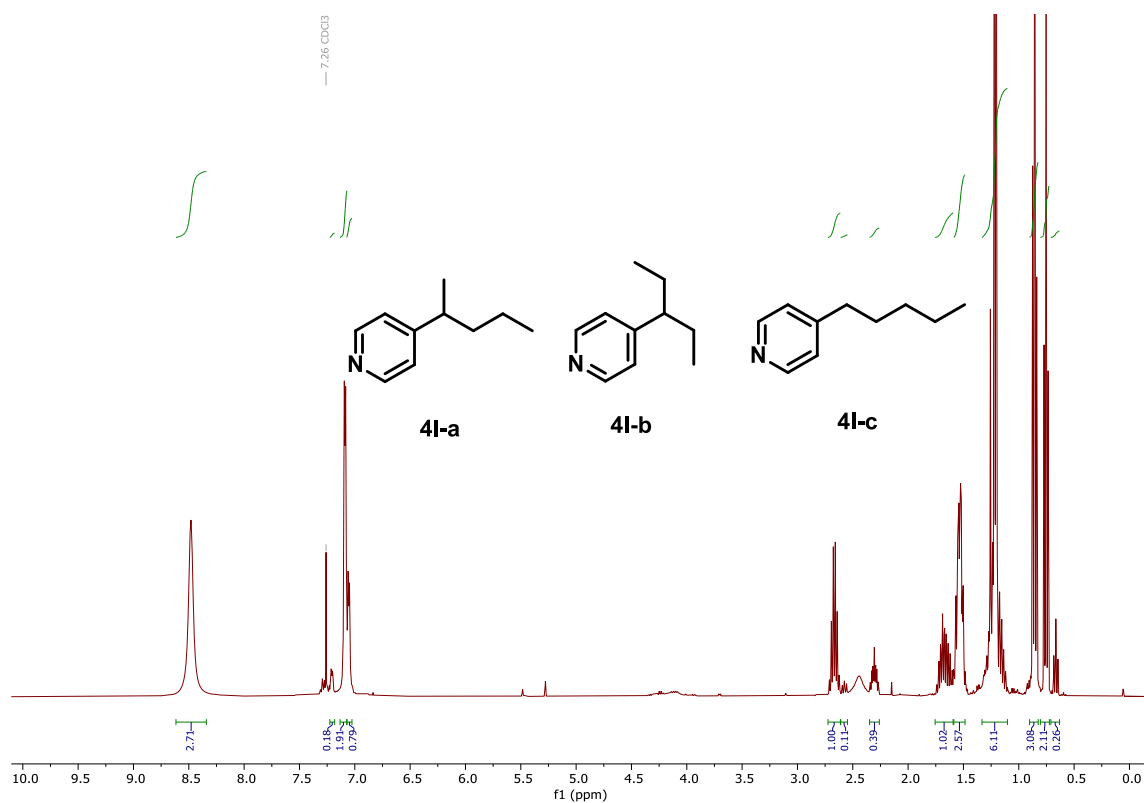

<sup>13</sup>C NMR (101 MHz, CDCl<sub>3</sub>) – 4I

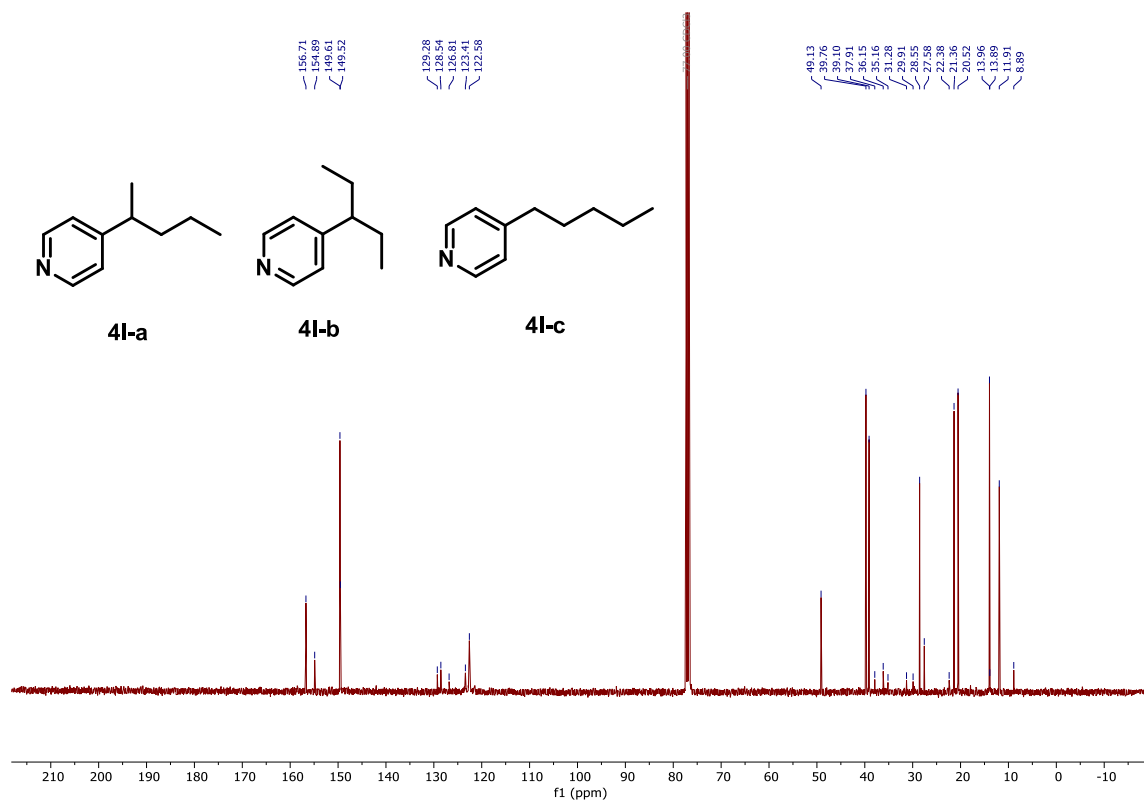

<sup>1</sup>H NMR (400 MHz, CDCl<sub>3</sub>) – **4m**

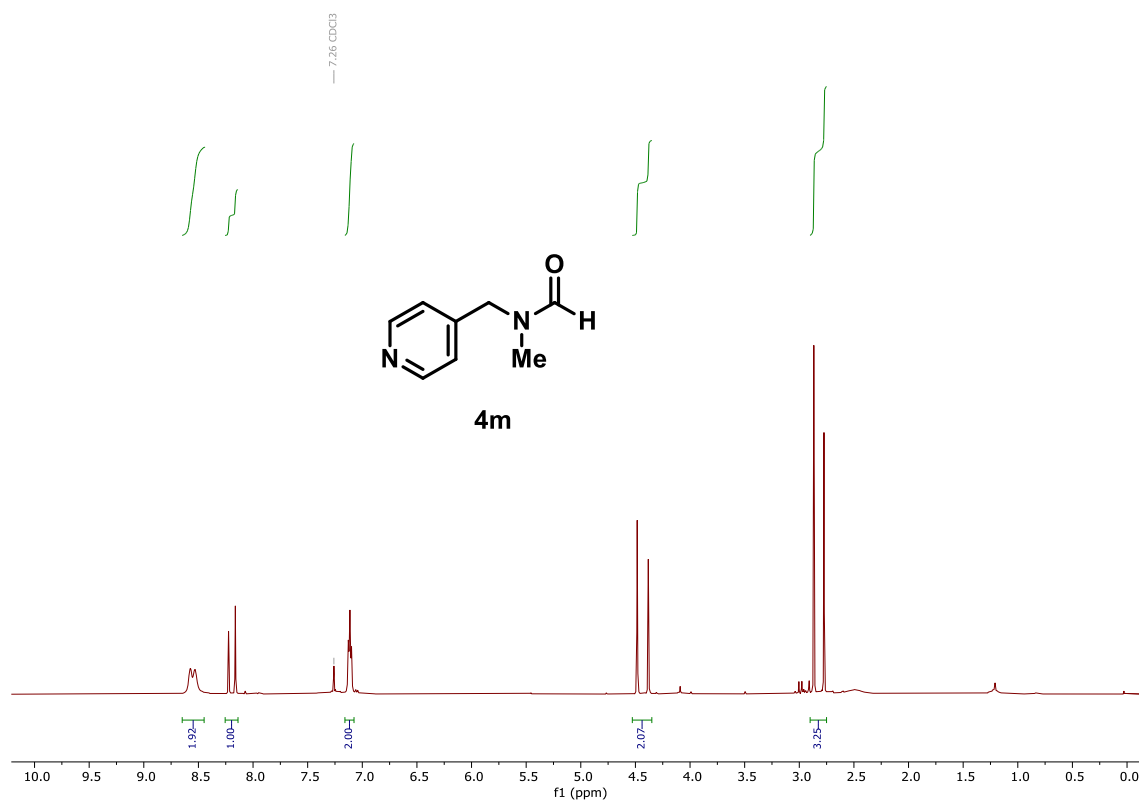

<sup>13</sup>C NMR (101 MHz, CDCl<sub>3</sub>) – **4m**

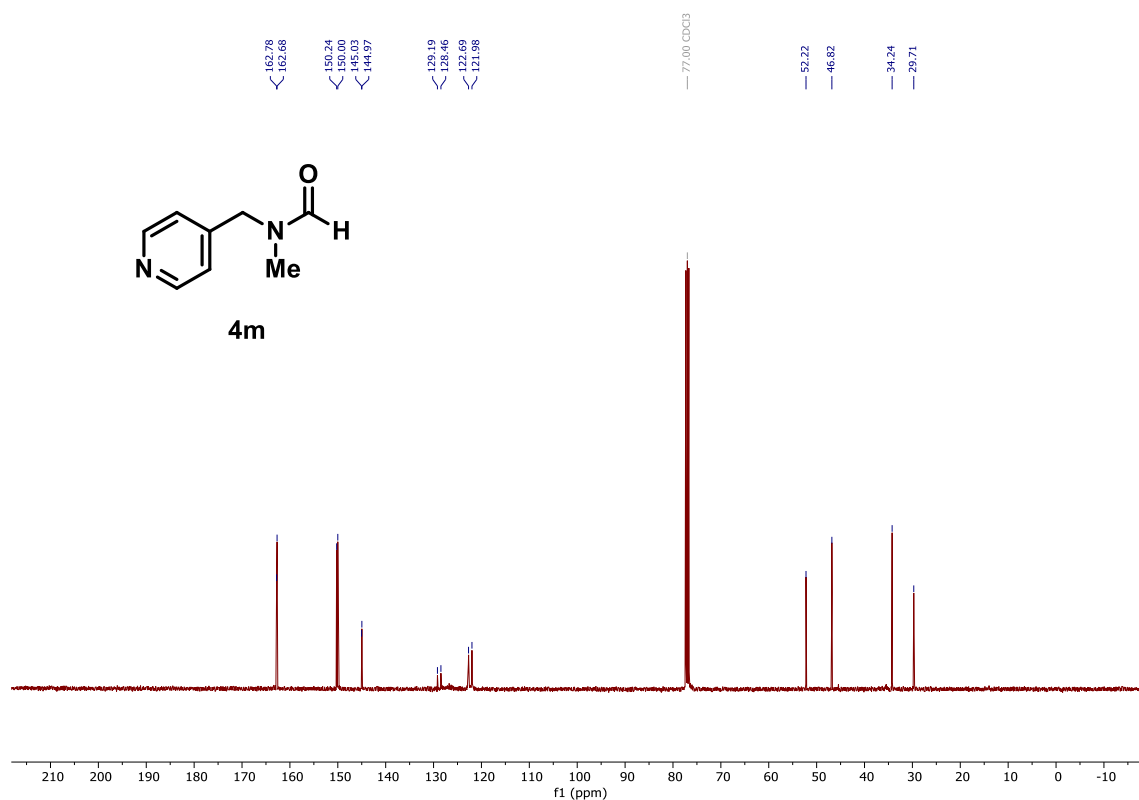

<sup>1</sup>H NMR (400 MHz, CDCl<sub>3</sub>) – 4n

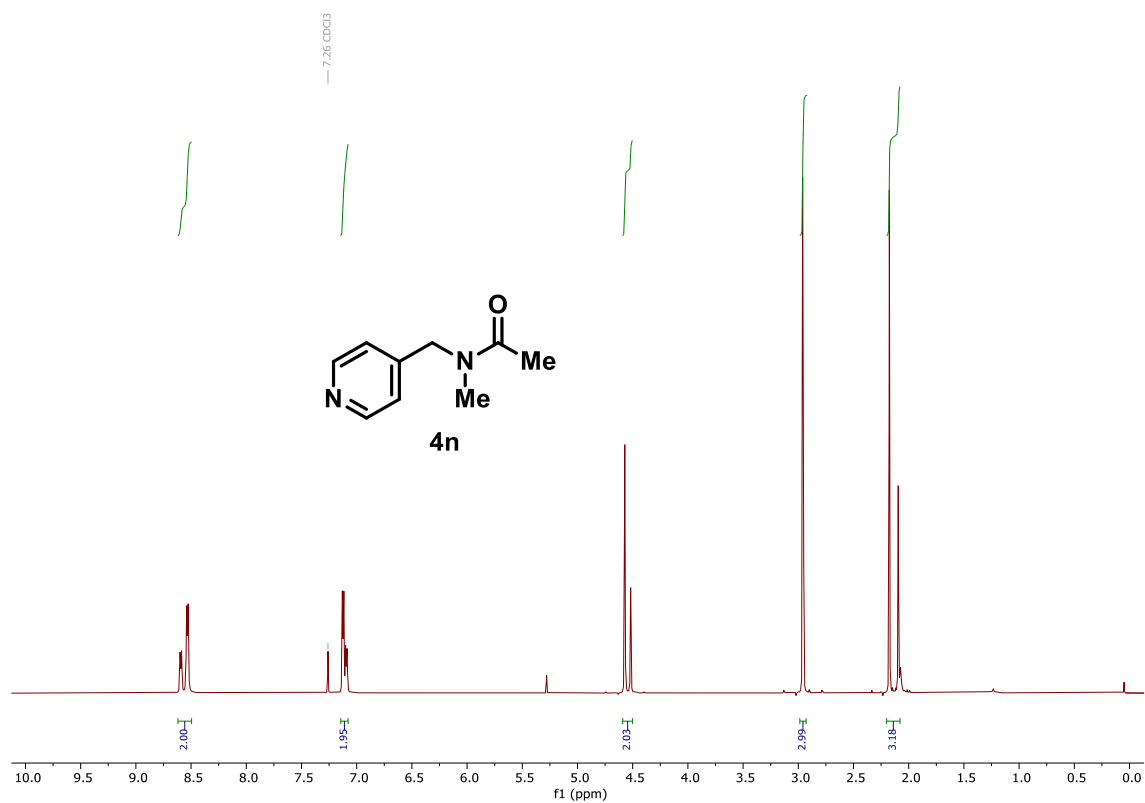

<sup>13</sup>C NMR (101 MHz, CDCl<sub>3</sub>) – 4n

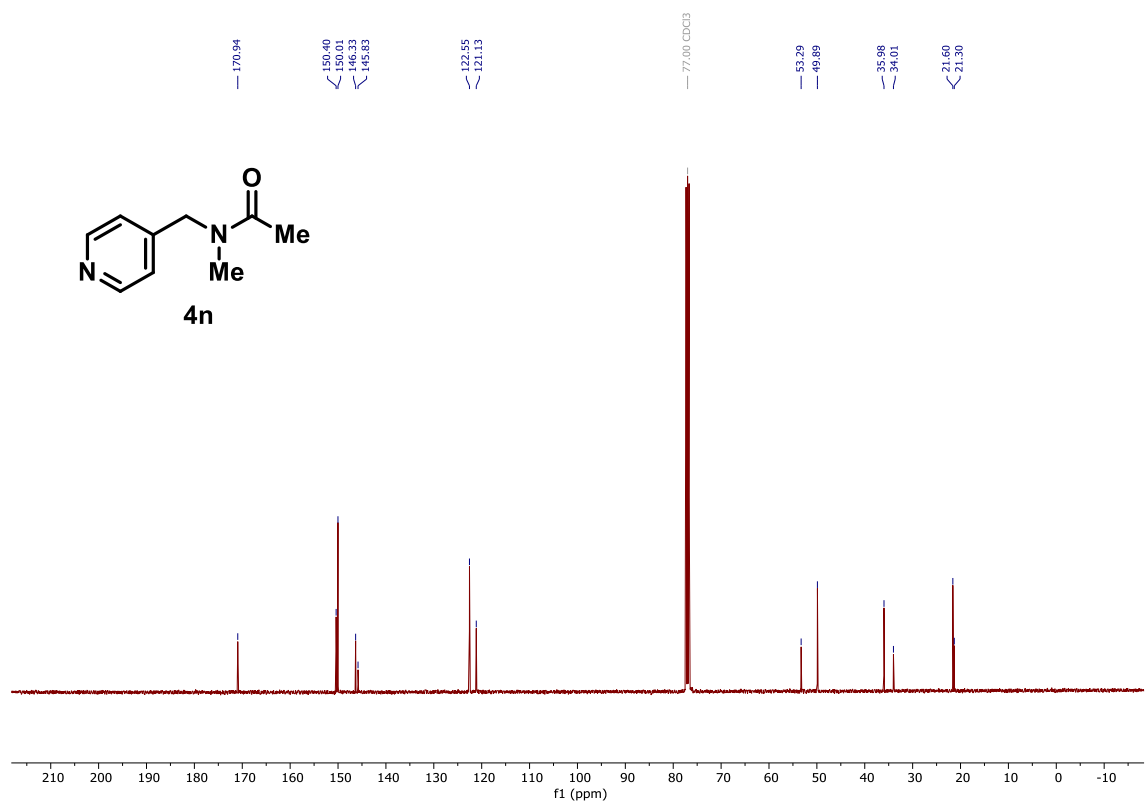

$^1\text{H}$  NMR (400 MHz,  $\text{CDCl}_3$ ) – **4o**

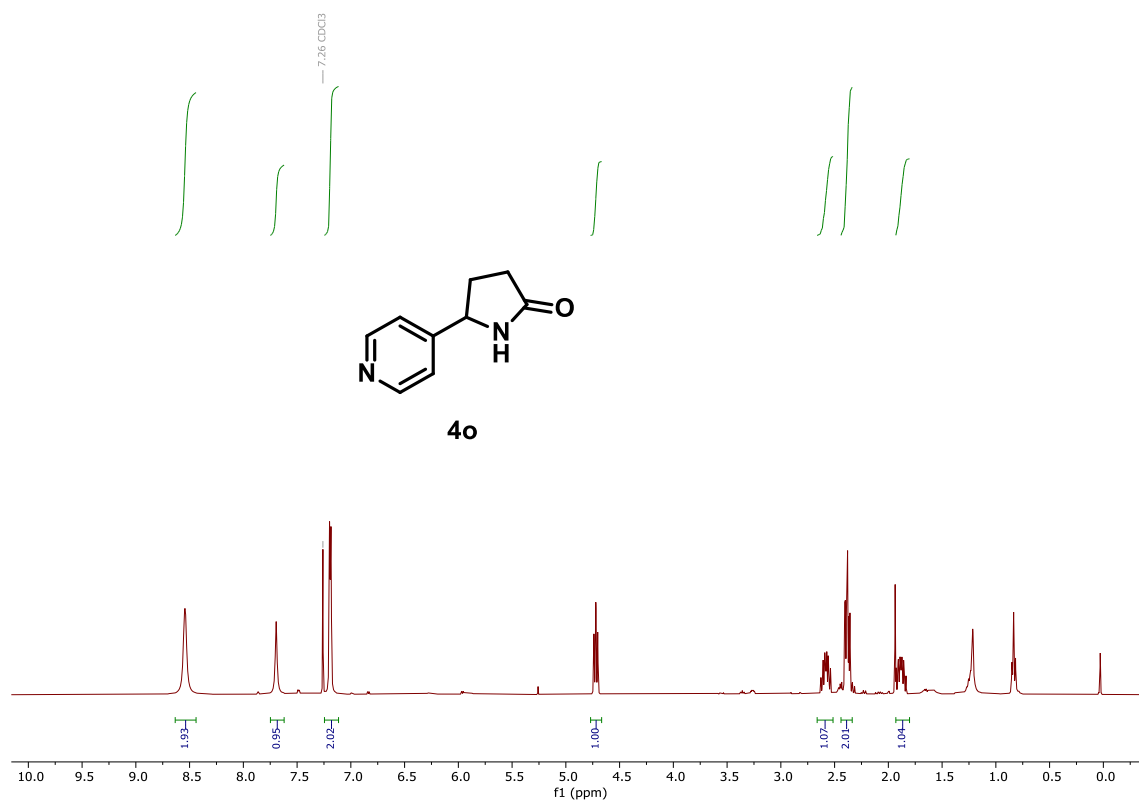

$^{13}\text{C}$  NMR (101 MHz,  $\text{CDCl}_3$ ) – **4o**

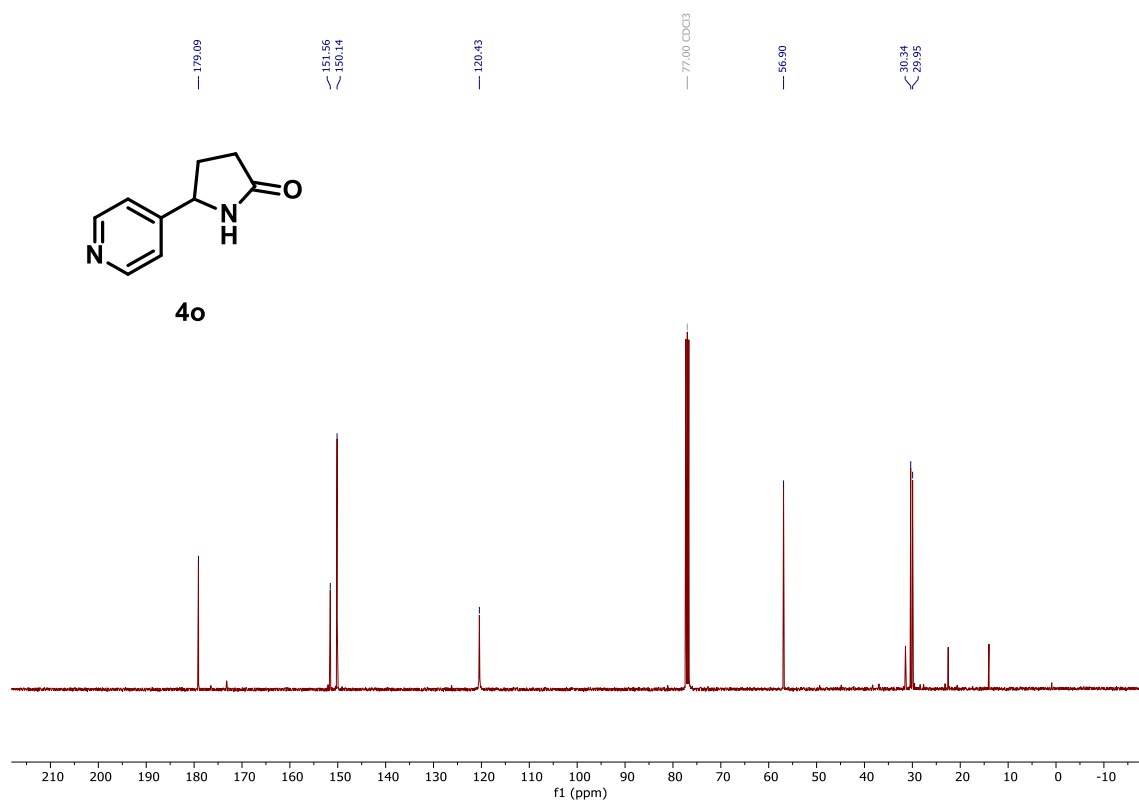

<sup>1</sup>H NMR (400 MHz, CDCl<sub>3</sub>) – 4p

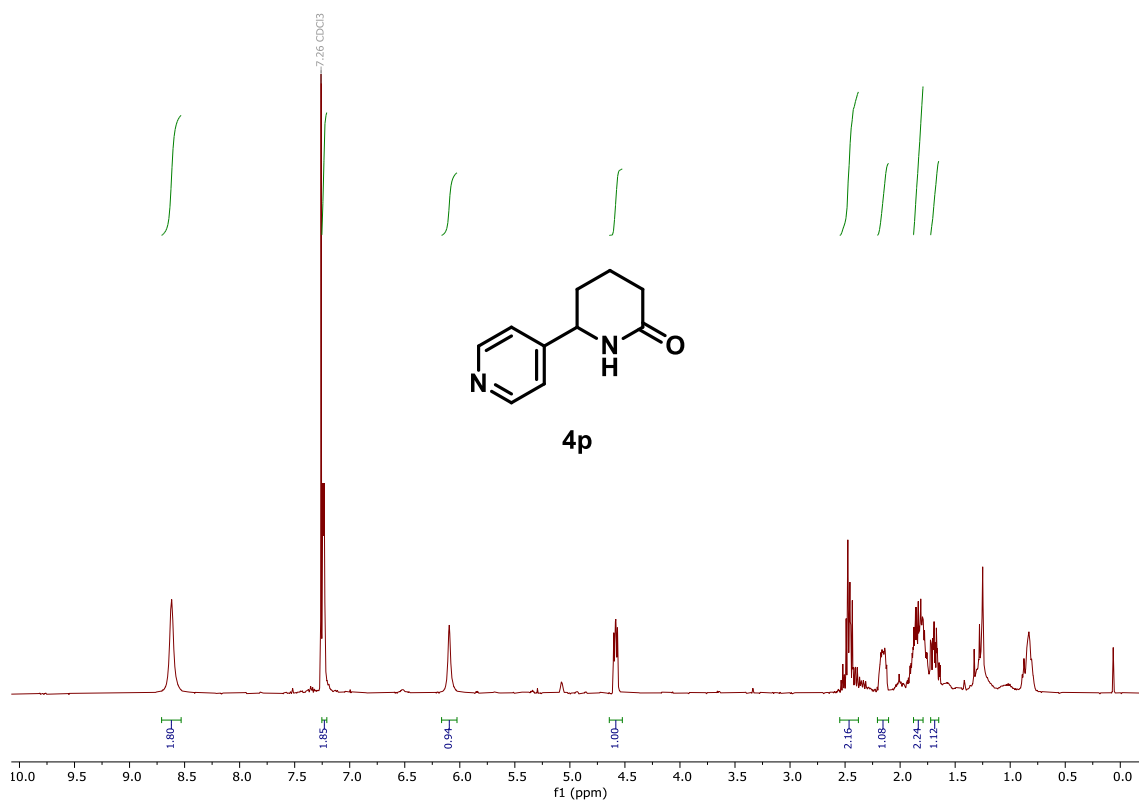

<sup>13</sup>C NMR (101 MHz, CDCl<sub>3</sub>) – 4p

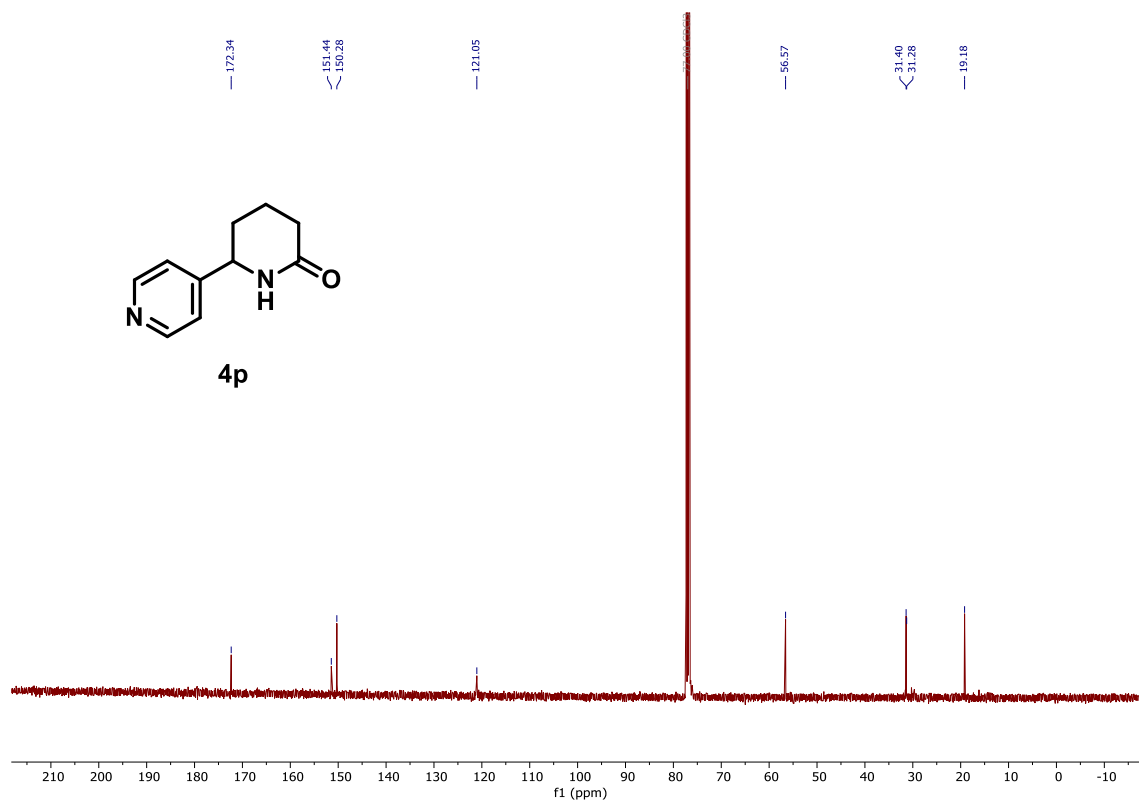

<sup>1</sup>H NMR (400 MHz, CDCl<sub>3</sub>) – **4q**

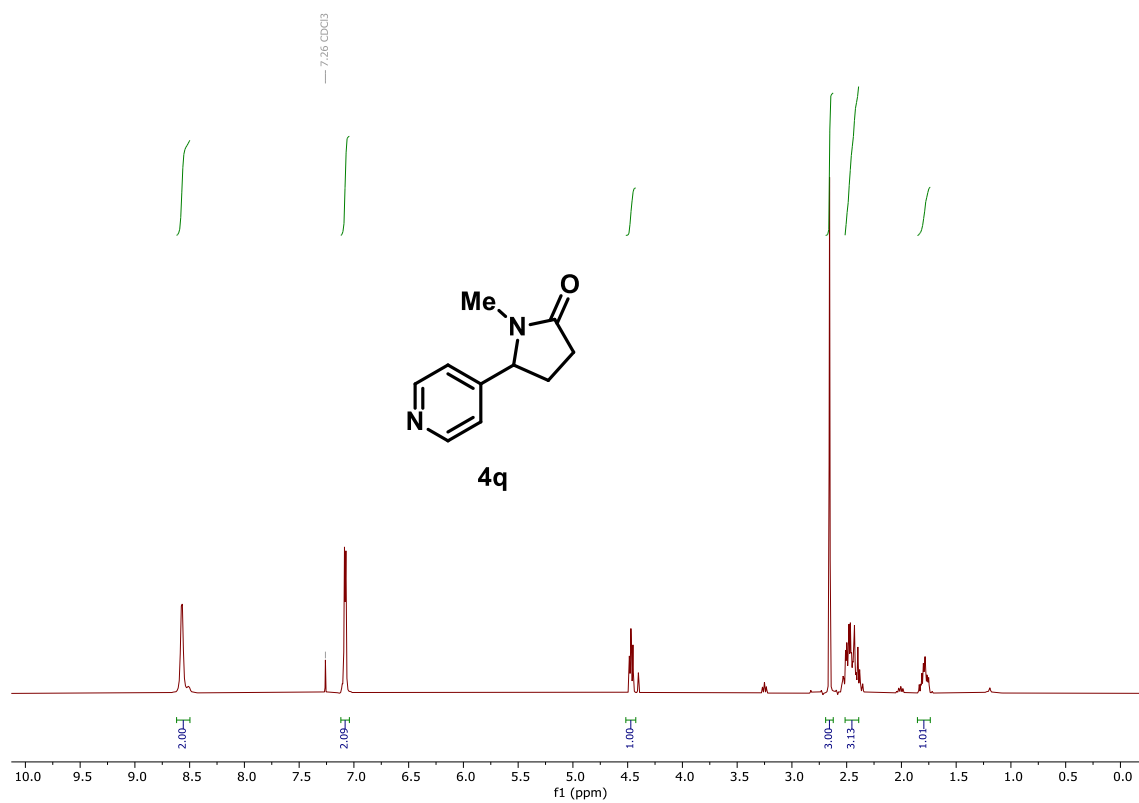

<sup>13</sup>C NMR (101 MHz, CDCl<sub>3</sub>) – **4q**

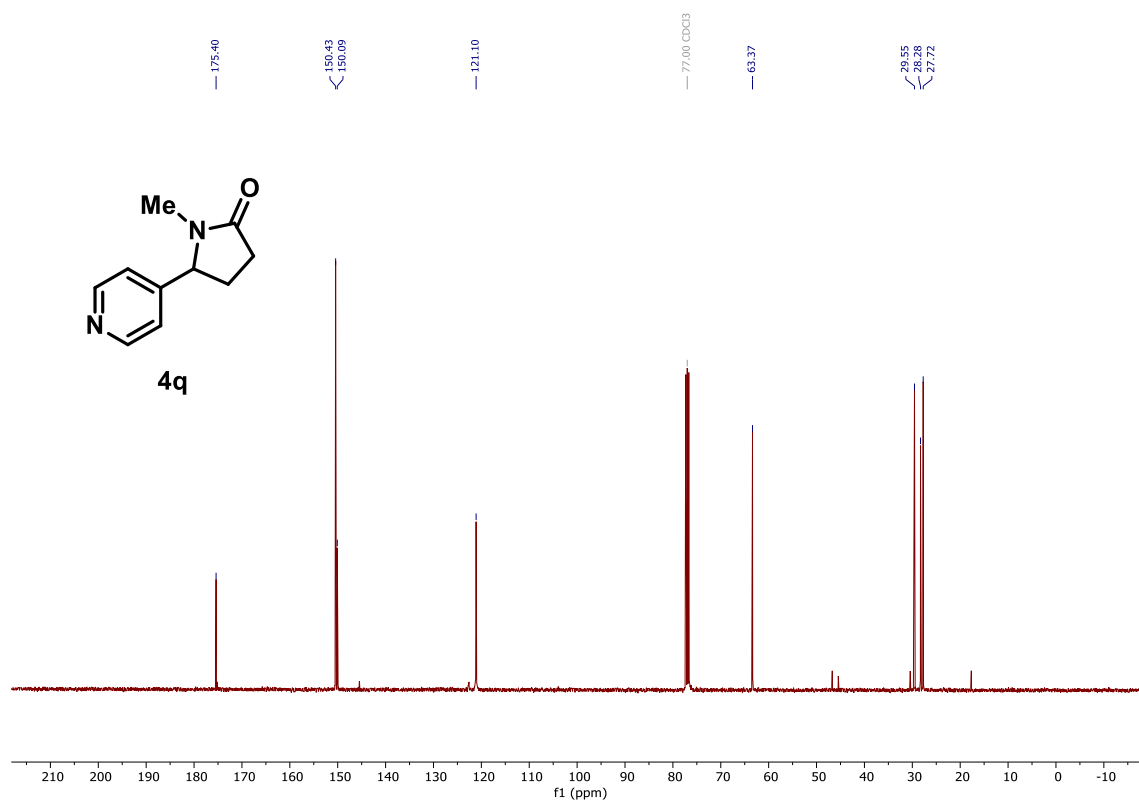

<sup>1</sup>H NMR (400 MHz, CDCl<sub>3</sub>) – 4r

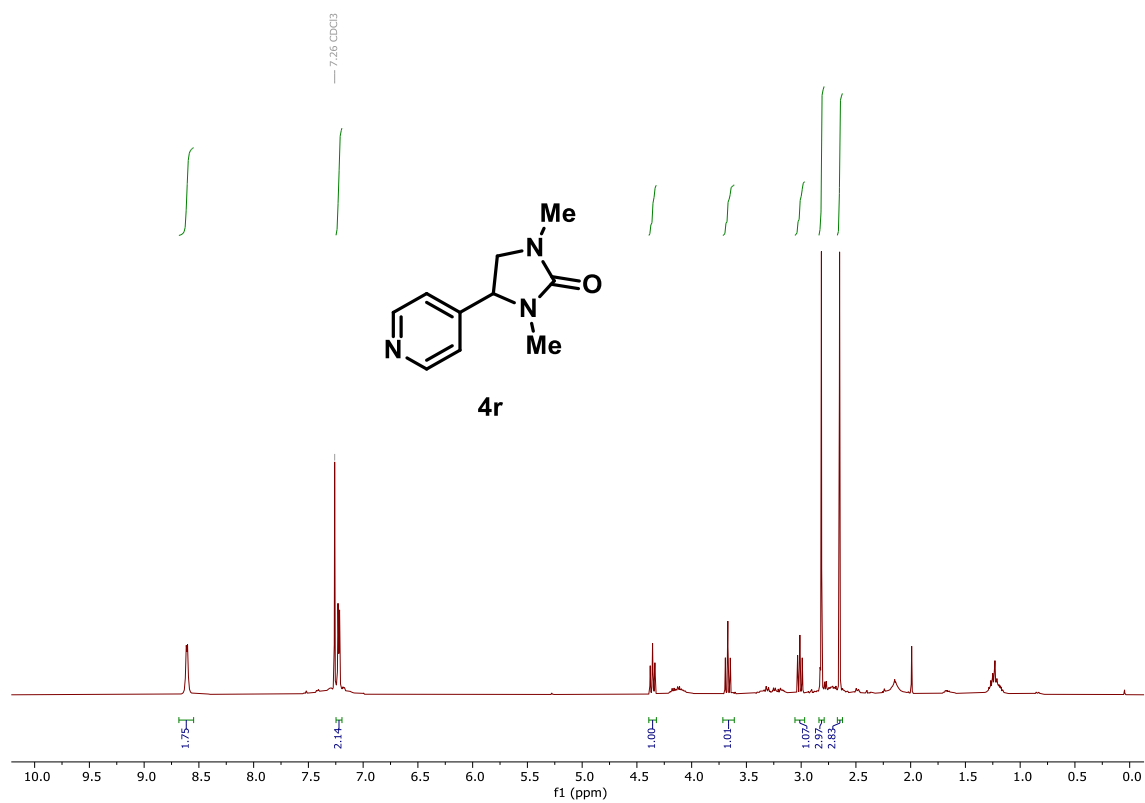

<sup>13</sup>C NMR (101 MHz, CDCl<sub>3</sub>) – 4r

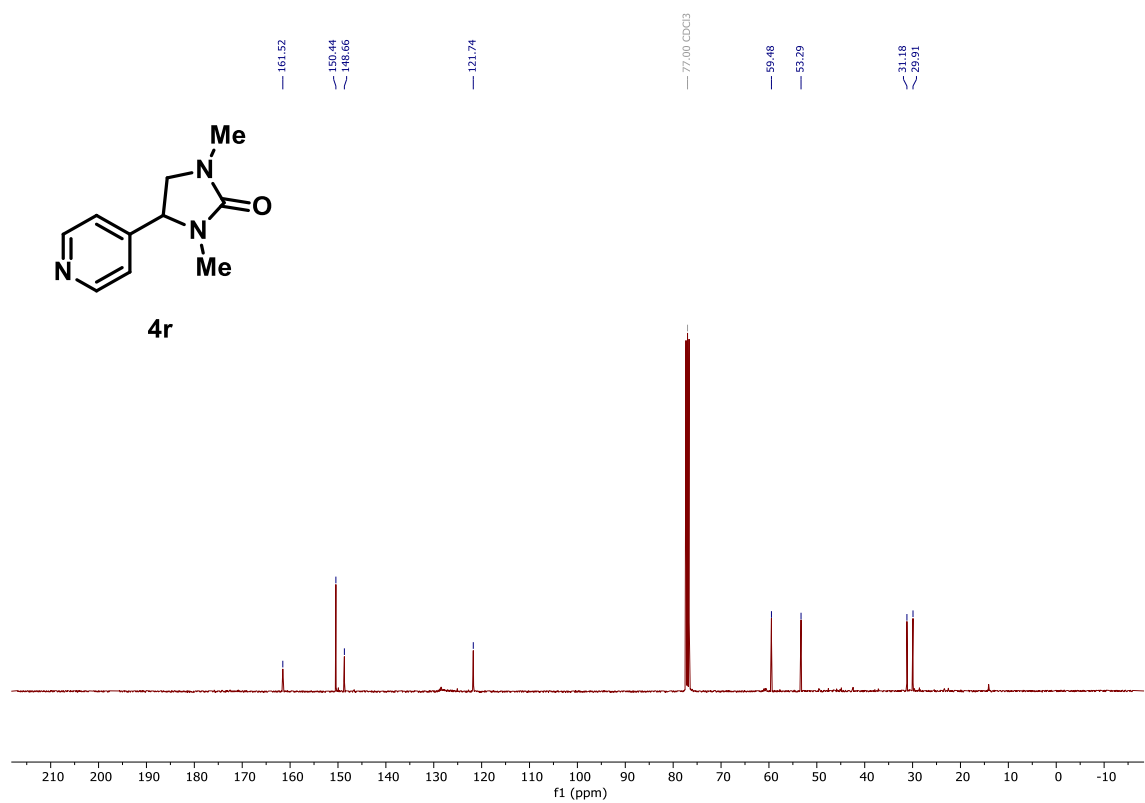

<sup>1</sup>H NMR (400 MHz, CDCl<sub>3</sub>) – 4s

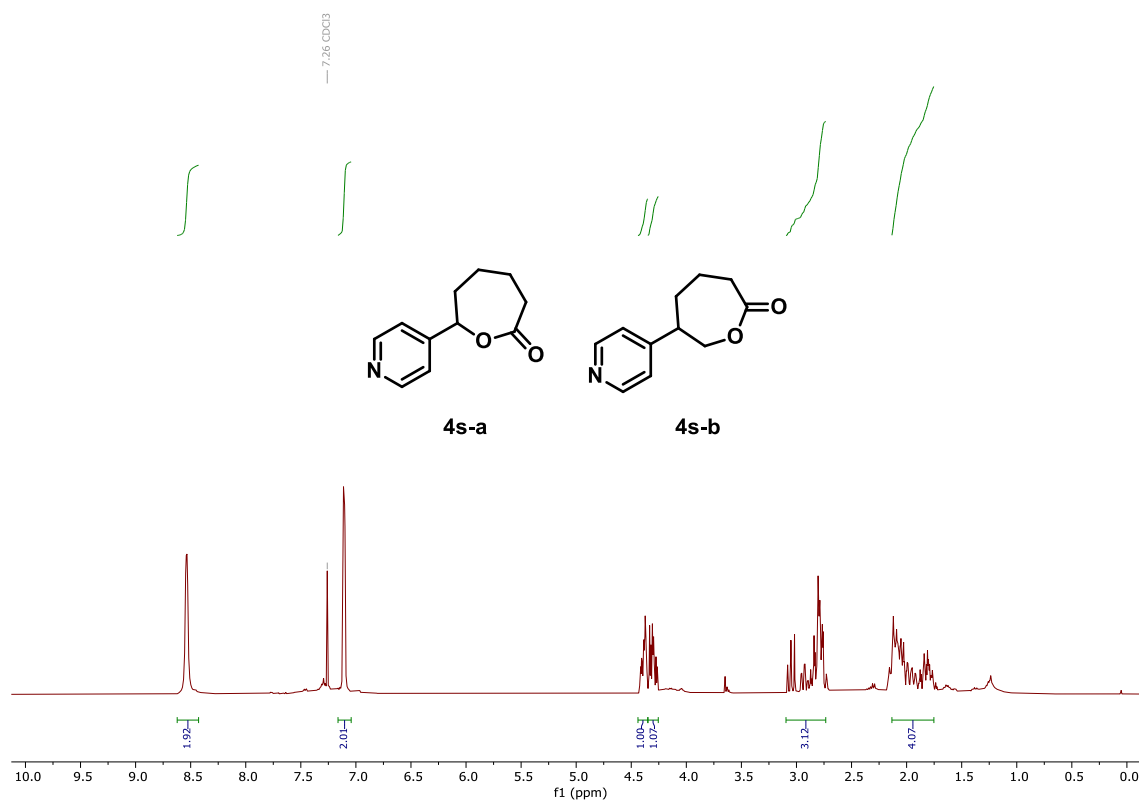

<sup>13</sup>C NMR (101 MHz, CDCl<sub>3</sub>) – 4s

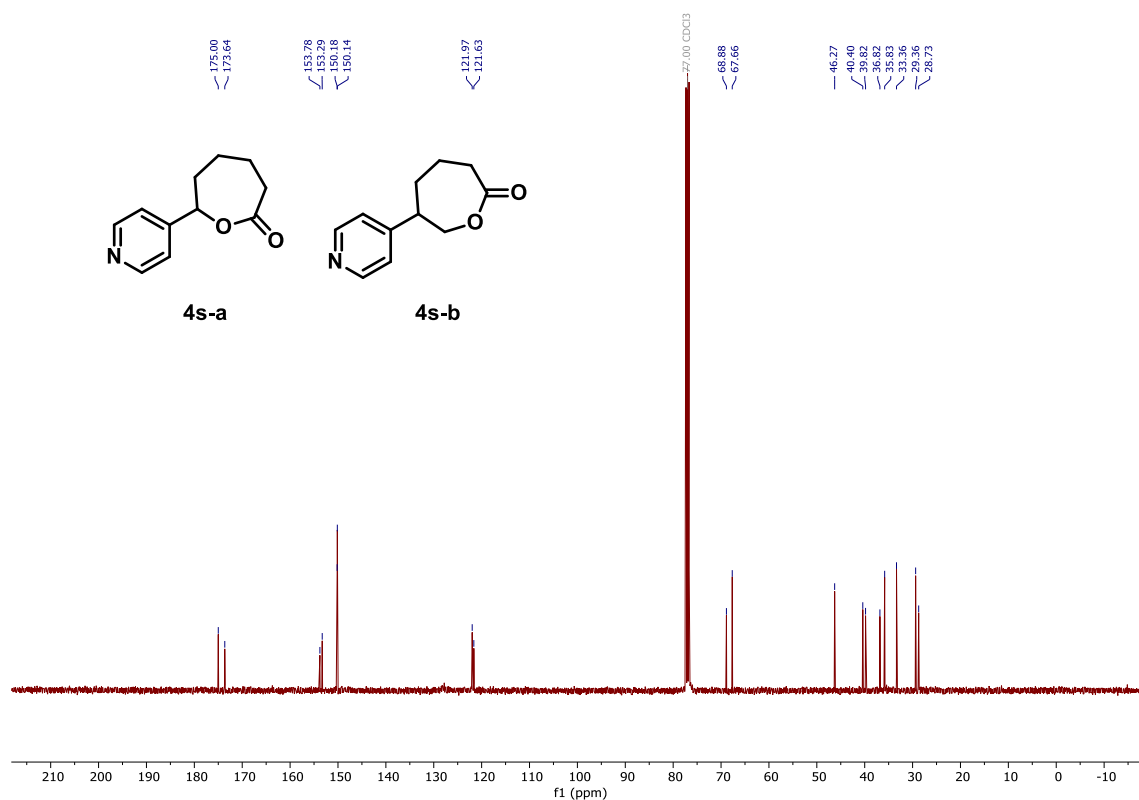

$^1\text{H}$  NMR (400 MHz,  $\text{CDCl}_3$ ) – **4t**

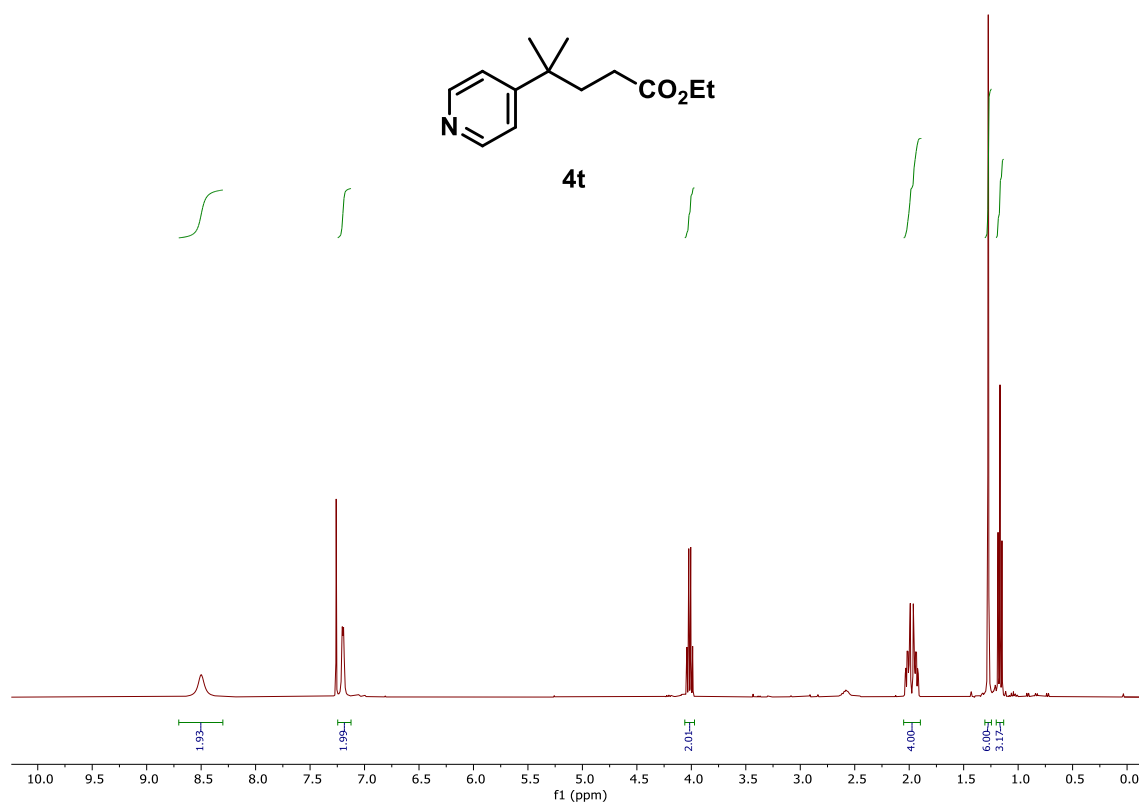

$^{13}\text{C}$  NMR (101 MHz,  $\text{CDCl}_3$ ) – **4t**

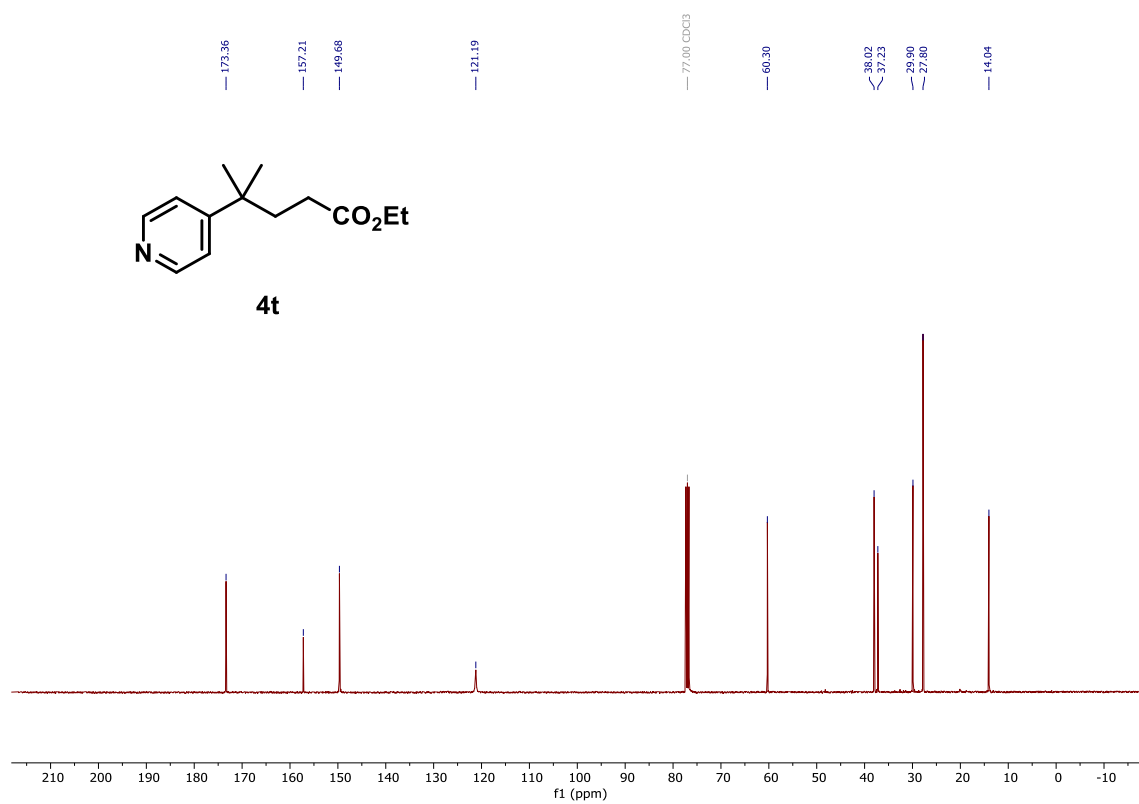

<sup>1</sup>H NMR (400 MHz, CDCl<sub>3</sub>) – **4u**

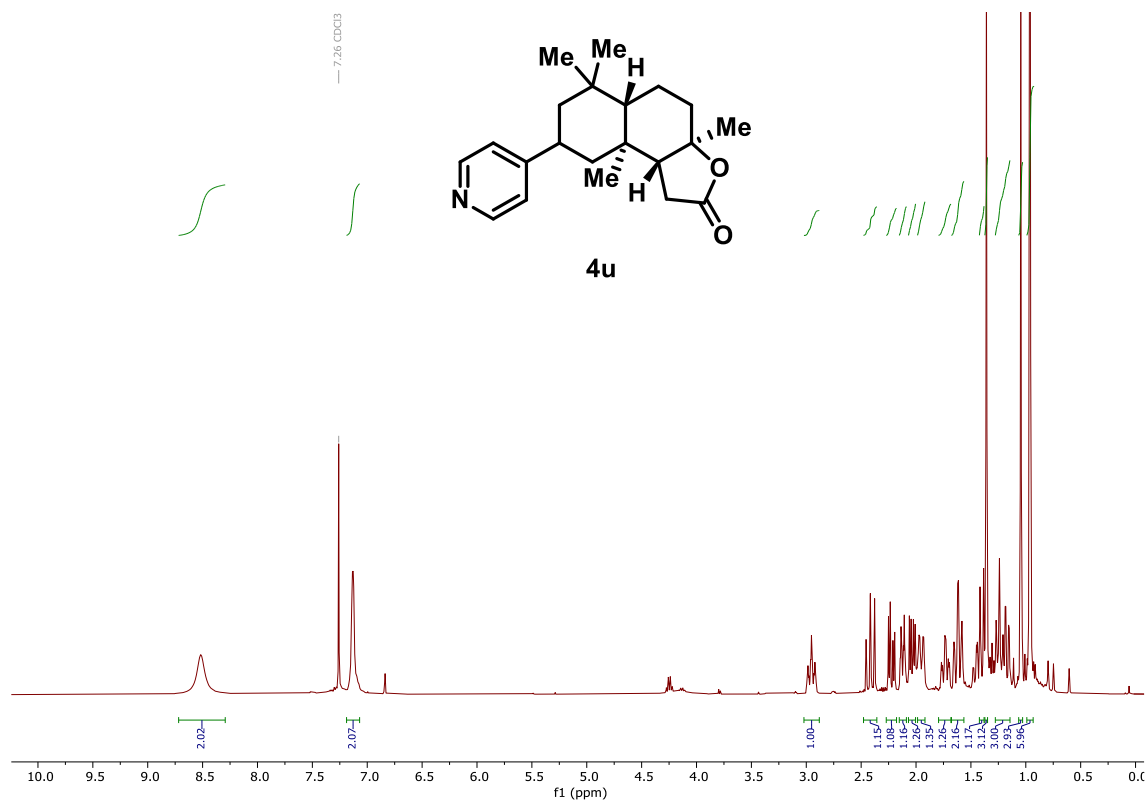

<sup>13</sup>C NMR (101 MHz, CDCl<sub>3</sub>) – **4u**

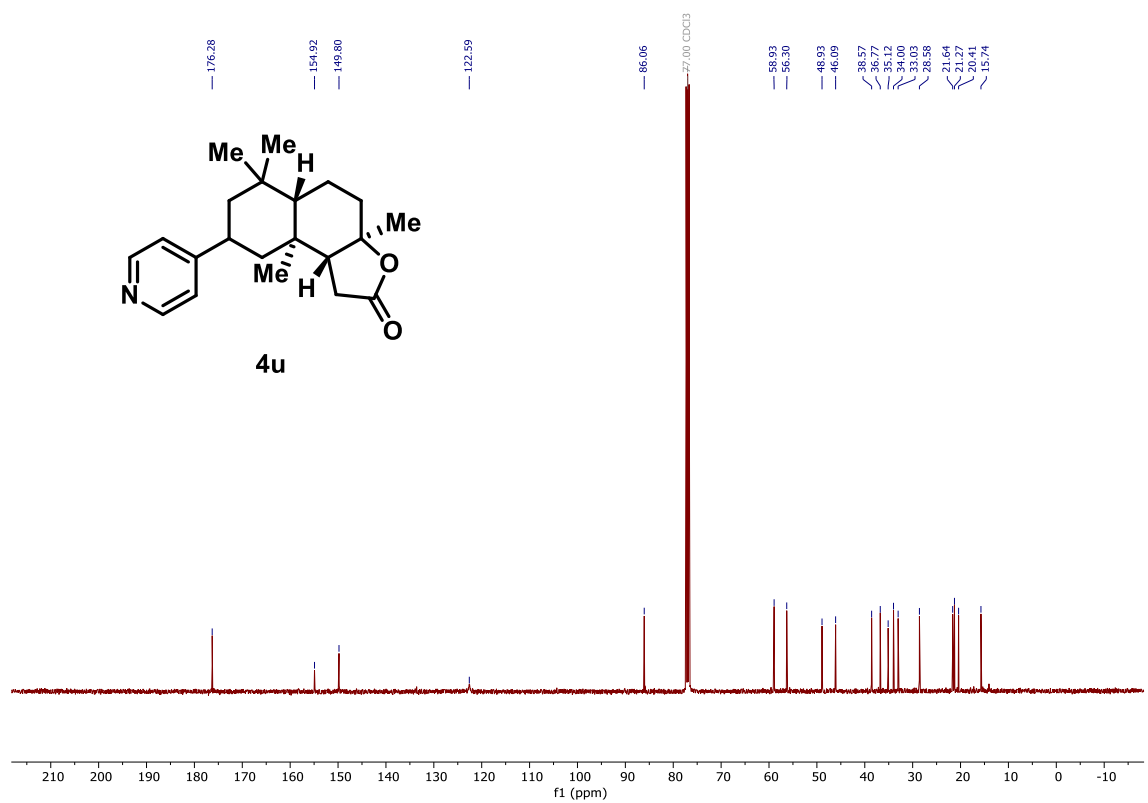

$^1\text{H}$  NMR (400 MHz,  $\text{CDCl}_3$ ) – **4v**

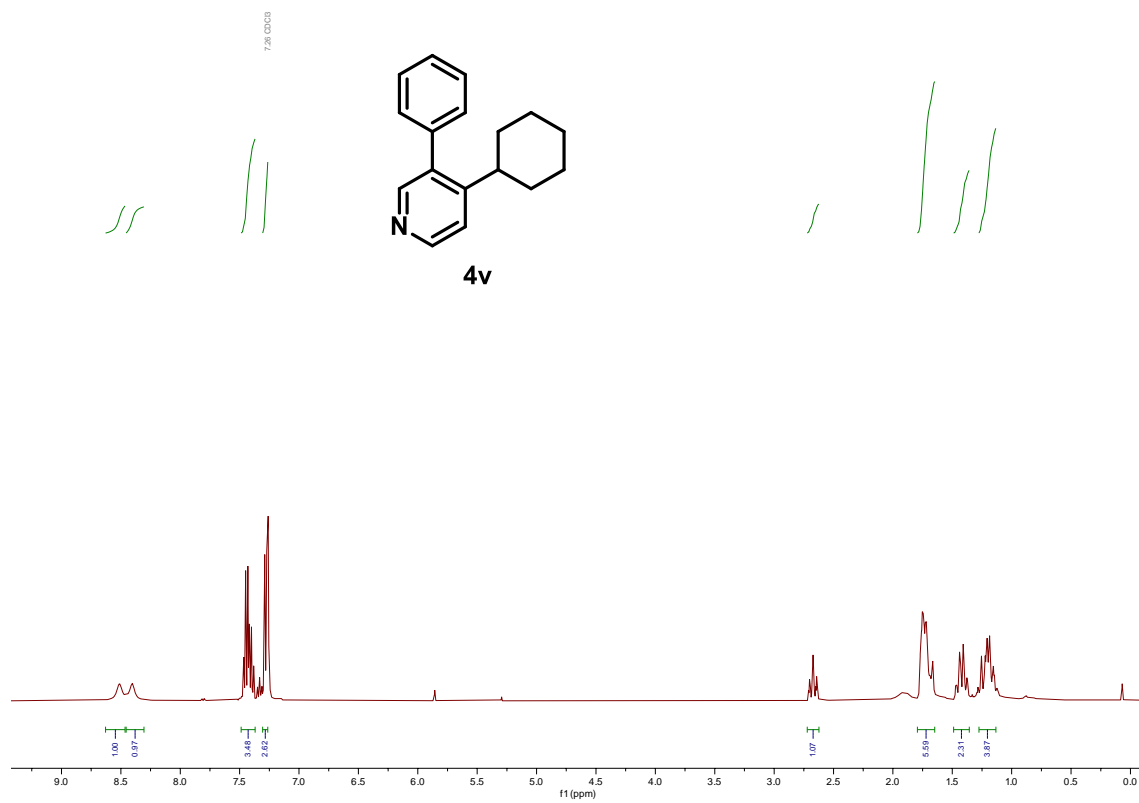

$^{13}\text{C}$  NMR (101 MHz,  $\text{CDCl}_3$ ) – **4v**

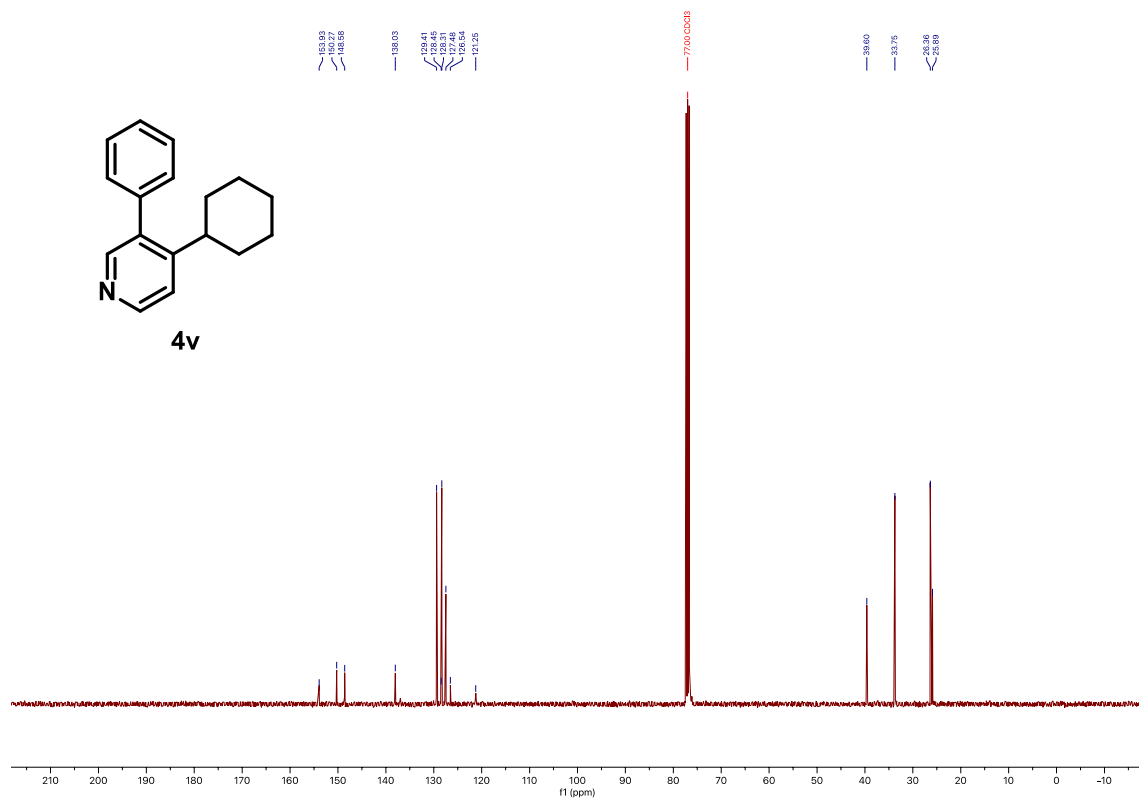

$^1\text{H}$  NMR (400 MHz,  $\text{CDCl}_3$ ) – **4w**

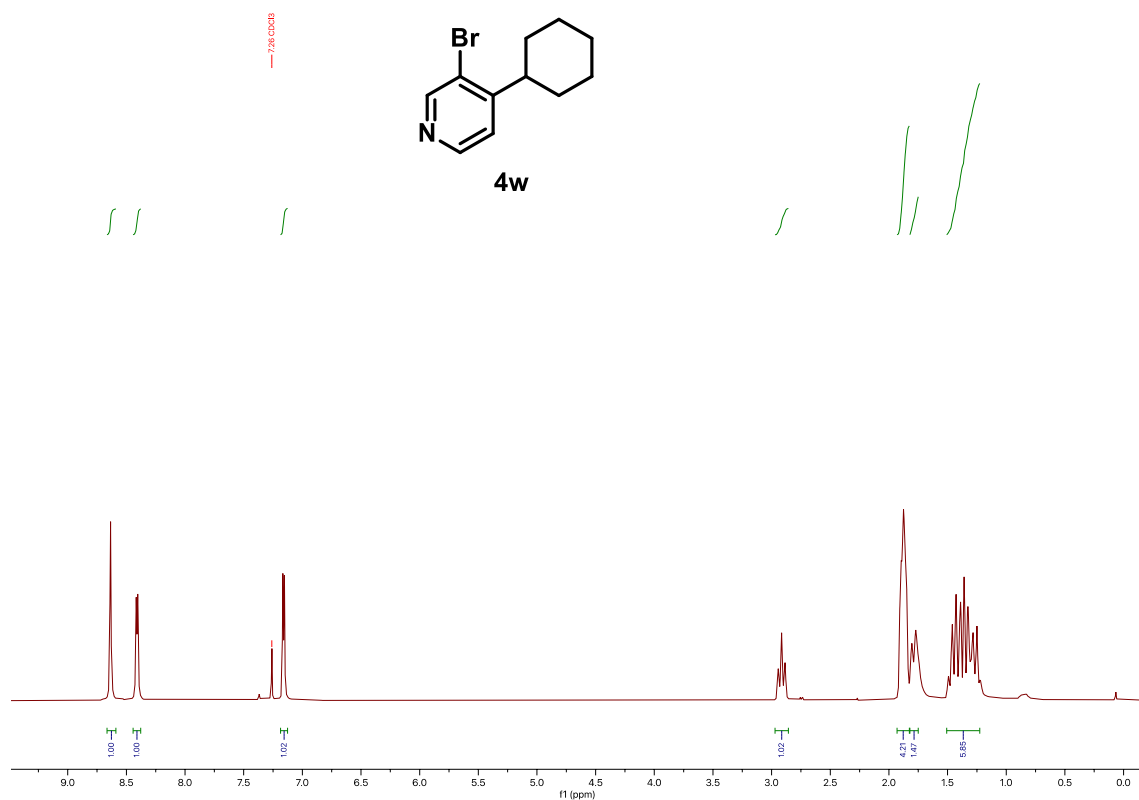

$^{13}\text{C}$  NMR (101 MHz,  $\text{CDCl}_3$ ) – **4w**

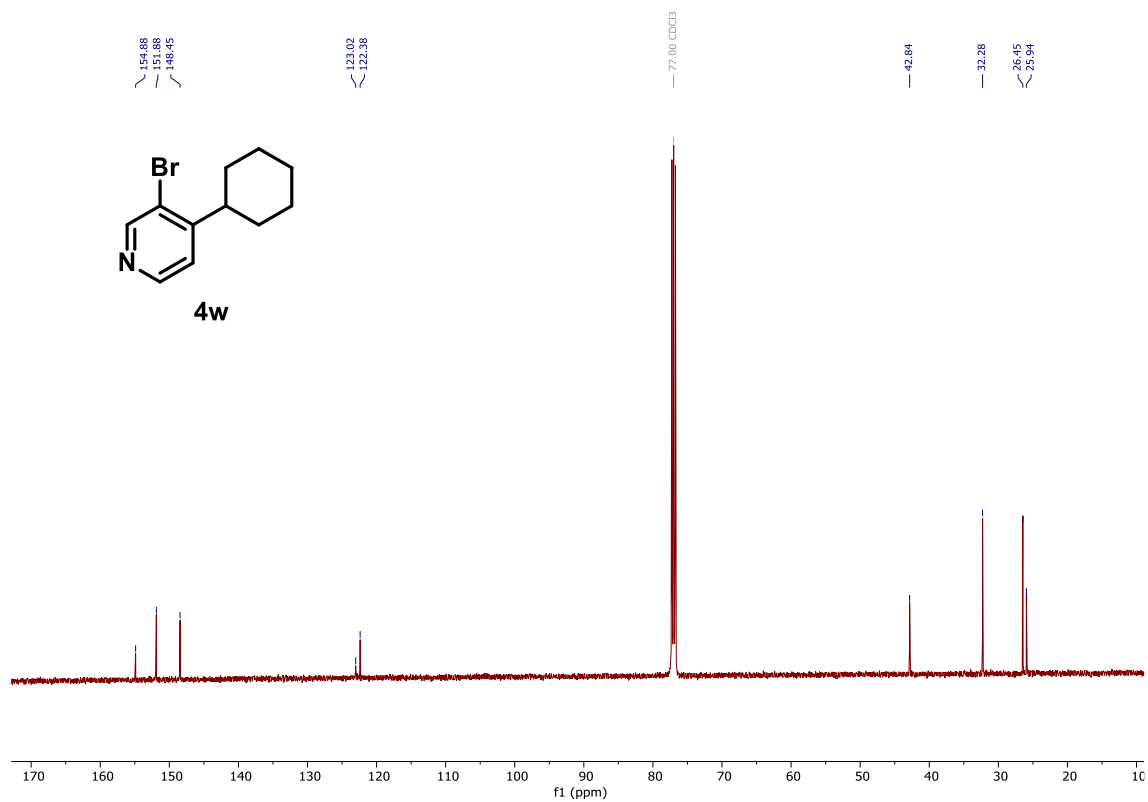

$^1\text{H}$  NMR (400 MHz,  $\text{CDCl}_3$ ) – **4x**

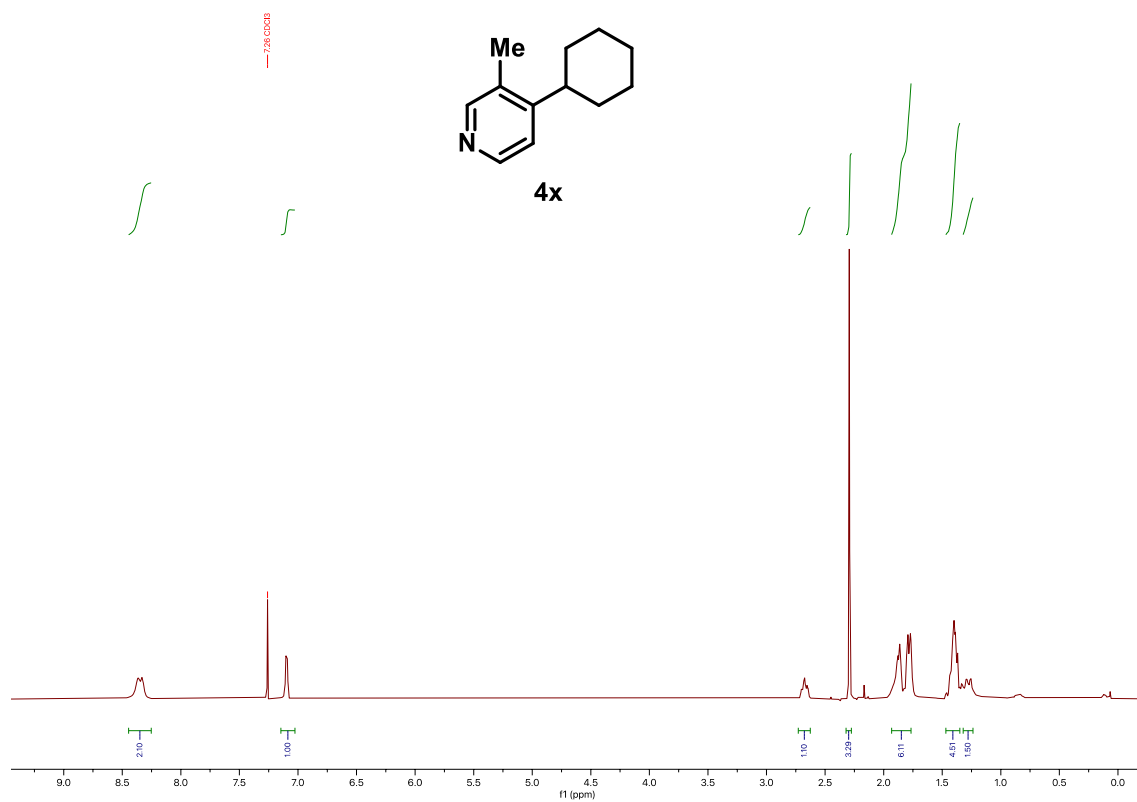

$^{13}\text{C}$  NMR (101 MHz,  $\text{CDCl}_3$ ) – **4x**

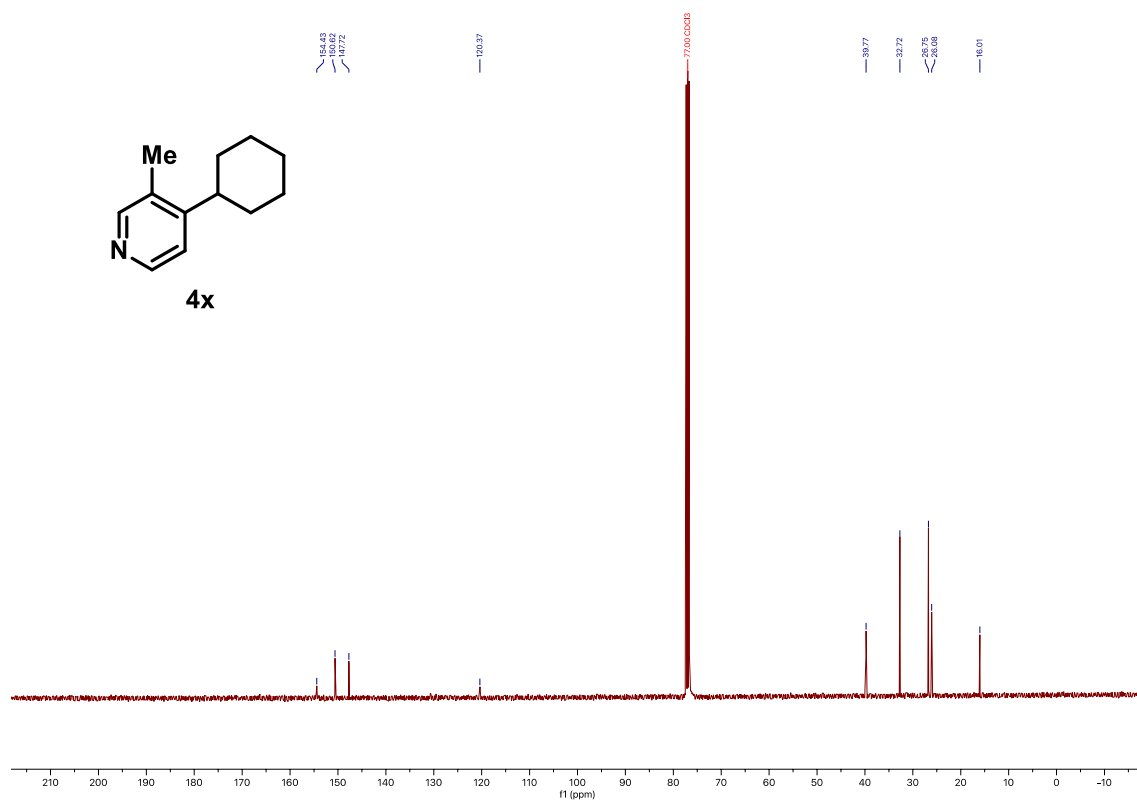

## 10 REFERENCES

- 1 J. Choi, G. Laudadio, E. Godineau and P. S. Baran, *J. Am. Chem. Soc.*, **2021**, *143*, 11927–11933.
- 2 Q. Chen, T. León and P. Knochel, *Angew. Chem., Int. Ed.*, **2014**, *53*, 8746–8750.
- 3 G. A. Molander, O. A. Argintaru, I. Aron and S. D. Dreher, *Org. Lett.*, **2010**, *12*, 5783–5785.
- 4 T. Hoshikawa and M. Inoue, *Chem. Sci.*, **2013**, *4*, 3118.
- 5 J. A. Bristol and R. Brambilla, *J. Org. Chem.*, **1979**, *44*, 1889–1891.
- 6 L. Gao, G. Wang, J. Cao, H. Chen, Y. Gu, X. Liu, X. Cheng, J. Ma and S. Li, *ACS Catal.*, **2019**, *9*, 10142–10151.
- 7 S. Ohmiya, M. Tsuji, K. Higashiyama, T. Yamauchi and H. Kubo, *Heterocycles*, **2001**, *54*, 1027.
- 8 K. Matsumoto, M. Nakajima, T. Nemoto, *J. Org. Chem.* **2020**, *85*, 11802–11811.
- 9 L. Zhang, B. Pfund, O. S. Wenger, X. Hu, *Angew. Chem.* **2022**, *134*, e202202649; *Angew. Chem. Int. Ed.* **2022**, *61*, e202202649.
- 10 Gaussian 16, Revision B.01, M. J. Frisch, G. W. Trucks, H. B. Schlegel, G. E. Scuseria, M. A. Robb, J. R. Cheeseman, G. Scalmani, V. Barone, G. A. Petersson, H. Nakatsuji, X. Li, M. Caricato, A. V. Marenich, J. Bloino, B. G. Janesko, R. Gomperts, B. Mennucci, H. P. Hratchian, J. V. Ortiz, A. F. Izmaylov, J. L. Sonnenberg, D. Williams-Young, F. Ding, F. Lipparini, F. Egidi, J. Goings, B. Peng, A. Petrone, T. Henderson, D. Ranasinghe, V. G. Zakrzewski, J. Gao, N. Rega, G. Zheng, W. Liang, M. Hada, M. Ehara, K. Toyota, R. Fukuda, J. Hasegawa, M. Ishida, T. Nakajima, Y. Honda, O. Kitao, H. Nakai, T. Vreven, K. Throssell, J. A. Montgomery, Jr., J. E. Peralta, F. Ogliaro, M. J. Bearpark, J. J. Heyd, E. N. Brothers, K. N. Kudin, V. N. Staroverov, T. A. Keith, R. Kobayashi, J. Normand, K. Raghavachari, A. P. Rendell, J. C. Burant, S. S. Iyengar, J. Tomasi, M. Cossi, J. M. Millam, M. Klene, C. Adamo, R. Cammi, J. W. Ochterski, R. L. Martin, K. Morokuma, O. Farkas, J. B. Foresman, and D. J. Fox, Gaussian, Inc., Wallingford CT, 2016.
- 11 J.-D. Chai, M. Head-Gordon, *Phys. Chem. Chem. Phys.* **2008**, *10*, 6615–6620.
- 12 P. C. Hariharan, J. A. Pople, *Theor. Chim. Acta* **1973**, *28*, 213–222.
- 13 M. Cossi, N. Rega, G. Scalmani, V. Barone, *J. Comput. Chem.* **2003**, *24*, 669–681.
- 14 H. Fuse, Y. Irie, M. Fuki, Y. Kobori, K. Kato, A. Yamakata, M. Higashi, H. Mitsunuma, M. Kanai, *J. Am. Chem. Soc.* **2022**, *144*, 6566–6574.
- 15 M. Álvarez-Moreno, C. de Graaf, N. López, F. Maseras, J. M. Poblet, C. Bo, *J. Chem. Inf. Model.* **2015**, *55*, 95–103.
